# Supplementary material for: Reactions of [(dmpe)2MnH(C2H4)]: synthesis and characterization of manganese(i) borohydride and hydride complexes
Source: Royal Society of Chemistry journal article supplement (doi:10.1039/d0dt01726d), 2020-01-01
Supplement: d0dt01726d2.pdf [file d0dt01726d2.pdf]

Electronic Supporting Information

**Reactions of [(dmpe)<sub>2</sub>MnH(C<sub>2</sub>H<sub>4</sub>)]: synthesis and characterization of manganese(I) borohydride and hydride complexes**

Jeffrey S. Price,<sup>a</sup> Declan M. DeJordy,<sup>a</sup> David J. H. Emslie,<sup>\*a</sup> and James F. Britten<sup>b</sup>

a. Department of Chemistry, McMaster University, 1280 Main Street West, Hamilton, Ontario, L8S 4M1, Canada. Fax: (905)-522-2509; Tel: (905)-525-9140 x23307

b. McMaster Analytical X-ray Diffraction Facility (MAX), McMaster University, 1280 Main Street West, Hamilton, Ontario, L8S 4M1.

E-mail: [emslie@mcmaster.ca](mailto:emslie@mcmaster.ca)

Website: <https://emsliegroupp.mcmaster.ca/>

The supplemental file *Cartesian\_coordinates\_for\_calculated\_structures.xyz* contains the computed Cartesian coordinates of all of the molecules reported in this study. The file may be opened as a text file to read the coordinates, or opened directly by a structure visualization program such as Mercury (version 3.3 or later, <http://www.ccdc.cam.ac.uk/pages/Home.aspx>).

| <b>Contents</b>                                                                                                                                                                                 | <b>Pages</b> |
|-------------------------------------------------------------------------------------------------------------------------------------------------------------------------------------------------|--------------|
| Computational Methods.....                                                                                                                                                                      | S2           |
| Figures Showing Calculated Structures with AIM Bond Paths and Critical Points.....                                                                                                              | S3           |
| Figures Showing Superimposed Calculated and X-ray Structures.....                                                                                                                               | S3           |
| Tables of Selected Calculated and Crystallographically Determined Bond Lengths and Angles, Mayer Bond Orders, and AIM Properties.....                                                           | S4-S5        |
| Tables of Crystal Data and Crystal Structure Refinement.....                                                                                                                                    | S6-S12       |
| Selected NMR Spectra for Complexes <b>3-8</b> .....                                                                                                                                             | S13-S48      |
| Selected NMR Spectra for Deuteration of [(dmpe) <sub>2</sub> Mn(μ-H) <sub>2</sub> BH <sub>2</sub> ] ( <b>3</b> ).....                                                                           | S49-S50      |
| Experimental Details and Selected NMR Spectra of Intermediates in the Reactions of [(dmpe) <sub>2</sub> MnH(C <sub>2</sub> H <sub>4</sub> )] ( <b>1</b> ) with 9-BBN or HBMe <sub>2</sub> ..... | S51          |
| Experimental Details and Selected NMR Spectra of Solutions Generated by Hydroboration of Ethylene by HBR <sub>2</sub> .....                                                                     | S52-S58      |
| Selected NMR Spectra for Determining the Mechanism of the Reaction of [(dmpe) <sub>2</sub> MnH(C <sub>2</sub> H <sub>4</sub> )] ( <b>1</b> ) with HBMe <sub>2</sub> .....                       | S59          |
| References.....                                                                                                                                                                                 | S60          |

**Selected Abbreviations:**

dmpe = 1,2-bis(dimethylphosphino)ethane

9-BBN = 9-borabicyclo(3.3.1)nonane (HBC<sub>8</sub>H<sub>14</sub>)

Mes = Mesityl (2,4,6-trimethylphenyl)

AIM = Atoms in Molecules

## Computational Methods

Geometry optimization calculations were conducted with the ADF DFT package (SCM, version 2017.207).<sup>1</sup> Calculations were performed in the gas phase within the generalized gradient approximation using the 1996 Perdew-Burke-Ernzerhof exchange and correlation functional (PBE),<sup>2</sup> using the scalar zeroth-order approximation (ZORA)<sup>3</sup> for relativistic effects, and Grimme's DFT-D3-BJ dispersion correction.<sup>4</sup> Preliminary geometry optimizations were conducted with frozen cores corresponding to the configuration of the preceding noble gas (core = medium) using double- $\zeta$  basis sets with one polarization function (DZP), a Voronoi grid with an integration value of 5, and default convergence criteria for energy and gradients. These structures were further refined using all-electron triple- $\zeta$  basis sets with two polarization functions (TZ2P) and fine integration grids (Becke<sup>5</sup> verygood-quality). Analytical frequency calculations<sup>6</sup> were conducted to ensure that the geometry optimization led to an energy minimum. For **3** and **4**, slightly negative frequencies (frequency range from  $-11$  to  $-42$   $\text{cm}^{-1}$ ) were observed but were shown to be spurious imaginary frequencies using the SCANFREQ command.<sup>7</sup> Atoms in Molecules (AIM)<sup>8</sup> properties were obtained using the QTAIM keyword in SCM version 2019.301<sup>1</sup> with an analysis level of Full.<sup>9</sup>

### Figures Showing Calculated Structures with AIM Bond Paths and Critical Points

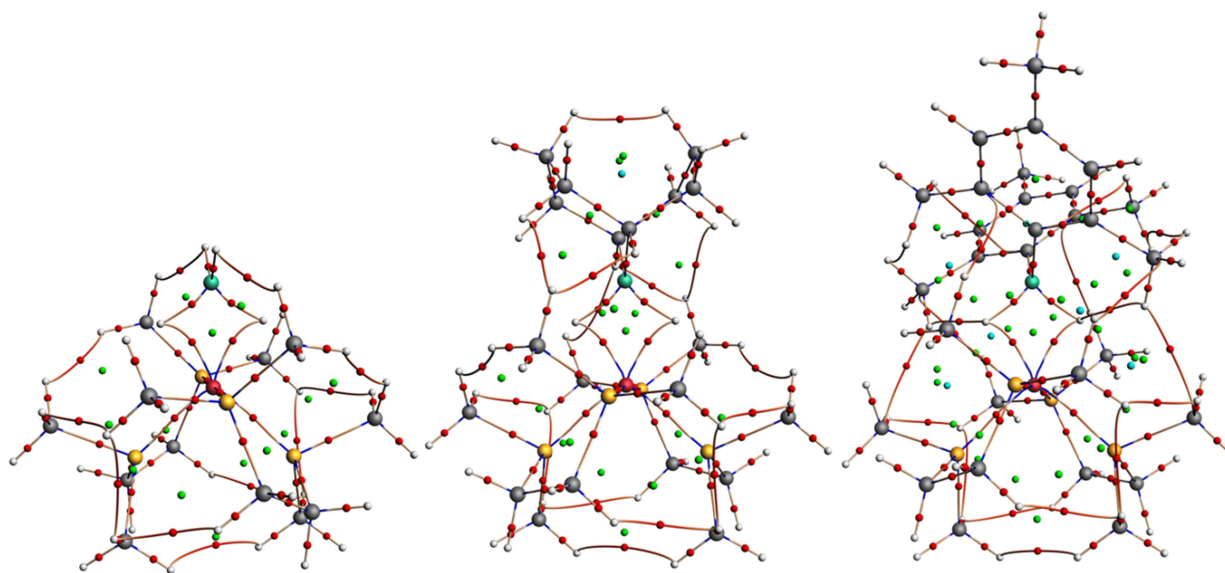

**Figure S1.** Calculated structures of, from left to right,  $[(\text{dmpe})_2\text{Mn}(\mu\text{-H})_2\text{BH}_2]$  (**3**),  $[(\text{dmpe})_2\text{Mn}(\mu\text{-H})_2\text{BC}_8\text{H}_{14}]$  (**4**), and  $[(\text{dmpe})_2\text{Mn}(\mu\text{-H})_2\text{BMes}_2]$  (**5**), with AIM bond paths, bond critical points (small red spheres), ring critical points (small green spheres), cage critical points (small blue spheres). Atoms labelled by colour; Mn = red, B = turquoise, C = grey, H = white.

### Figures Showing Superimposed Calculated and X-ray Structures

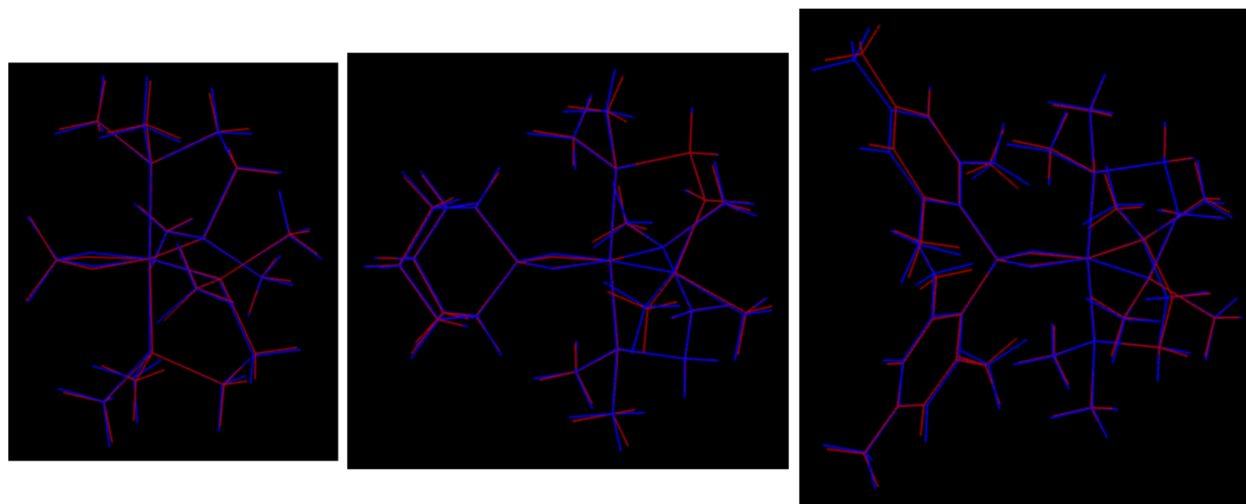

**Figure S2.** Superposition of calculated (blue) and X-ray (red) structures of, from left to right,  $[(\text{dmpe})_2\text{Mn}(\mu\text{-H})_2\text{BH}_2]$  (**3**),  $[(\text{dmpe})_2\text{Mn}(\mu\text{-H})_2\text{BC}_8\text{H}_{14}]$  (**4**), and  $[(\text{dmpe})_2\text{Mn}(\mu\text{-H})_2\text{BMes}_2]$  (**5**).

**Tables of Selected Calculated and Crystallographically Determined Bond Lengths and Angles, Mayer Bond Orders, and AIM Properties**

**Table S1.** Selected calculated and crystallographically determined bond lengths (Å), Mayer bond orders, and AIM properties for borohydride complexes [(dmpe)<sub>2</sub>Mn(μ-H)<sub>2</sub>BH<sub>2</sub>] (**3**), [(dmpe)<sub>2</sub>Mn(μ-H)<sub>2</sub>BC<sub>8</sub>H<sub>14</sub>] (**4**), and [(dmpe)<sub>2</sub>Mn(μ-H)<sub>2</sub>BMes<sub>2</sub>] (**5**). b.o. = bond order, δ = bond delocalization index, bpl = bond path length, ρ = electron density, ∇<sup>2</sup>ρ = Laplacian of the electron density, G = gradient kinetic energy density, V = potential energy density, H = total energy density of Cremer and Kraka, ε = ellipticity. H<sub>b</sub> refers to the MnH<sub>2</sub>B environments.

|                         |                                |                  | <b>3</b>         | <b>4</b>         | <b>5</b>         |
|-------------------------|--------------------------------|------------------|------------------|------------------|------------------|
| Mn-H <sub>b</sub>       |                                | d(XRD)           | 1.76(4), 1.78(4) | 1.66(3), 1.71(2) | 1.69(4), 1.72(4) |
|                         |                                | d(DFT)           | 1.69, 1.70       | 1.68, 1.68       | 1.71, 1.71       |
|                         |                                | Mayer b.o.       | 0.48, 0.48       | 0.54, 0.54       | 0.45, 0.45       |
|                         | bond critical point properties | δ                | 0.476, 0.477     | 0.494, 0.496     | 0.452, 0.453     |
|                         |                                | bpl              | 1.81, 1.81       | 1.75, 1.76       | 1.78, 1.78       |
|                         |                                | ρ                | 0.0833, 0.0836   | 0.0842, 0.0834   | 0.0782, 0.0782   |
|                         |                                | ∇ <sup>2</sup> ρ | 0.225, 0.228     | 0.242, 0.248     | 0.237, 0.237     |
|                         |                                | G (au)           | 0.0831, 0.0839   | 0.0860, 0.0878   | 0.0806, 0.0806   |
|                         |                                | V (au)           | -0.110, -0.111   | -0.112, -0.114   | -0.102, -0.102   |
|                         |                                | H (au)           | -0.0268, -0.0269 | -0.0256, -0.0257 | -0.0213, -0.0213 |
| ε                       | 1.00, 1.01                     | 0.578, 0.584     | 0.482, 0.482     |                  |                  |
| B-H <sub>b</sub>        |                                | d(XRD)           | 1.31(4), 1.34(4) | 1.25(2), 1.31(2) | 1.19(4), 1.24(3) |
|                         |                                | d(DFT)           | 1.32, 1.32       | 1.34, 1.34       | 1.32, 1.32       |
|                         |                                | Mayer            | 0.55, 0.55       | 0.44, 0.44       | 0.48, 0.48       |
|                         | bond critical point properties | δ                | 0.418, 0.419     | 0.389, 0.393     | 0.396, 0.396     |
|                         |                                | bpl              | 1.34, 1.34       | 1.36, 1.36       | 1.33, 1.33       |
|                         |                                | ρ                | 0.127, 0.127     | 0.122, 0.122     | 0.126, 0.126     |
|                         |                                | ∇ <sup>2</sup> ρ | -0.152, -0.152   | -0.151, -0.153   | -0.156, -0.156   |
|                         |                                | G (au)           | 0.0664, 0.0665   | 0.0603, 0.0607   | 0.0655, 0.0655   |
|                         |                                | V (au)           | -0.171, -0.171   | -0.159, -0.159   | -0.170, -0.170   |
|                         |                                | H (au)           | -0.104, -0.105   | -0.0985, -0.0986 | -0.104, -0.104   |
| ε                       | 0.121, 0.121                   | 0.121, 0.124     | 0.123, 0.123     |                  |                  |
| B-H <sub>terminal</sub> |                                | d(XRD)           | 1.18(4), 1.19(5) | -                | -                |
|                         |                                | d(DFT)           | 1.21, 1.22       | -                | -                |
|                         |                                | Mayer            | 0.81, 0.81       | -                | -                |
|                         | bond critical point properties | δ                | 0.592, 0.593     | -                | -                |
|                         |                                | bpl              | 1.21, 1.22       | -                | -                |
|                         |                                | ρ                | 0.169, 0.169     | -                | -                |
|                         |                                | ∇ <sup>2</sup> ρ | -0.336, -0.337   | -                | -                |
|                         |                                | G (au)           | 0.0923, 0.0923   | -                | -                |
|                         |                                | V (au)           | -0.269, -0.269   | -                | -                |
|                         |                                | H (au)           | -0.176, -0.177   | -                | -                |
| ε                       | 0.0940, 0.0948                 | -                | -                |                  |                  |
| Mn-B                    |                                | d(XRD)           | 2.170(4)         | 2.206(2)         | 2.245(3)         |
|                         |                                | d(DFT)           | 2.13             | 2.17             | 2.22             |
|                         |                                | Mayer            | 0.43             | 0.43             | 0.35             |
|                         |                                | δ                | 0.230            | 0.213            | 0.188            |
| Mn(μ-H) <sub>2</sub> B  | ring critical point properties | ρ                | 0.0789           | 0.0752           | 0.0702           |
|                         |                                | ∇ <sup>2</sup> ρ | 0.134            | 0.138            | 0.147            |
|                         |                                | G (au)           | 0.0640           | 0.0614           | 0.0587           |
|                         |                                | V (au)           | -0.0945          | -0.0884          | -0.0808          |
|                         |                                | H (au)           | -0.0305          | -0.0270          | -0.0221          |
|                         |                                | ε                | -4.27            | -3.09            | -2.65            |



**Table S2.** Selected calculated and crystallographically determined angles (°). cent.BR<sub>2</sub> = centroid between the two terminal substituents on boron.

|        |                                                                                        |     | <b>3</b>       | <b>4</b>           | <b>5</b>           |
|--------|----------------------------------------------------------------------------------------|-----|----------------|--------------------|--------------------|
| Angles | H <sub>b</sub> -Mn-H <sub>b</sub>                                                      | XRD | 75(2)          | 70(1)              | 65(2)              |
|        |                                                                                        | DFT | 76.4           | 76.5               | 73.0               |
|        | H <sub>b</sub> -B-H <sub>b</sub>                                                       | XRD | 109(2)         | 99(1)              | 97(2)              |
|        |                                                                                        | DFT | 105.3          | 101.7              | 100.3              |
|        | Mn-B-R                                                                                 | XRD | 120(2), 127(2) | 126.9(1), 128.2(1) | 123.2(2), 124.1(2) |
|        |                                                                                        | DFT | 124.0, 124.4   | 127.1, 127.6       | 123.6, 123.6       |
|        | Mn-B-(cent.BR <sub>2</sub> )                                                           | XRD | 173.6          | 178.7              | 179.4              |
|        |                                                                                        | DFT | 179.7          | 179.3              | 180.0              |
|        | plane(H <sub>b</sub> -Mn-H <sub>b</sub> )/<br>plane(H <sub>b</sub> -B-H <sub>b</sub> ) | XRD | 8.3            | 3.5                | 0.2                |
|        |                                                                                        | DFT | 0.5            | 0.4                | 0.0                |

### Tables of Crystal Data and Crystal Structure Refinement

**Table S3.** Crystal and structure refinement data for [(dmpe)<sub>2</sub>Mn(μ-H)<sub>2</sub>BH<sub>2</sub>] (**3**).

|                                             |                                                               |
|---------------------------------------------|---------------------------------------------------------------|
| Identification code                         | MnBH4                                                         |
| Empirical formula                           | C <sub>12</sub> H <sub>36</sub> BMnP <sub>4</sub>             |
| Formula weight                              | 370.04                                                        |
| Temperature/K                               | 100                                                           |
| Crystal system                              | orthorhombic                                                  |
| Space group                                 | Pbca                                                          |
| a/Å                                         | 11.8683(5)                                                    |
| b/Å                                         | 11.8704(5)                                                    |
| c/Å                                         | 28.4192(14)                                                   |
| α/°                                         | 90                                                            |
| β/°                                         | 90                                                            |
| γ/°                                         | 90                                                            |
| Volume/Å <sup>3</sup>                       | 4003.7(3)                                                     |
| Z                                           | 8                                                             |
| ρ <sub>calc</sub> /cm <sup>3</sup>          | 1.228                                                         |
| μ/mm <sup>-1</sup>                          | 0.965                                                         |
| F(000)                                      | 1584.0                                                        |
| Crystal size/mm <sup>3</sup>                | 0.47 × 0.383 × 0.144                                          |
| Radiation                                   | MoKα (λ = 0.71073)                                            |
| 2θ range for data collection/°              | 3.432 to 60.978                                               |
| Index ranges                                | -16 ≤ h ≤ 15, -16 ≤ k ≤ 16, -40 ≤ l ≤ 35                      |
| Reflections collected                       | 35368                                                         |
| Independent reflections                     | 6389 [R <sub>int</sub> = 0.0507, R <sub>sigma</sub> = 0.0424] |
| Data/restraints/parameters                  | 6389/2/184                                                    |
| Goodness-of-fit on F <sup>2</sup>           | 1.201                                                         |
| Final R indexes [I ≥ 2σ (I)]                | R <sub>1</sub> = 0.0557, wR <sub>2</sub> = 0.1282             |
| Final R indexes [all data]                  | R <sub>1</sub> = 0.0596, wR <sub>2</sub> = 0.1299             |
| Largest diff. peak/hole / e Å <sup>-3</sup> | 1.29/-0.56                                                    |

**Table S4.** Crystal and structure refinement data for [(dmpe)<sub>2</sub>Mn(μ-H)<sub>2</sub>BC<sub>8</sub>H<sub>14</sub>] (**4**).

|                                             |                                                          |
|---------------------------------------------|----------------------------------------------------------|
| Identification code                         | MnH_9BBN                                                 |
| Empirical formula                           | C <sub>20</sub> H <sub>48</sub> BMnP <sub>4</sub>        |
| Formula weight                              | 478.21                                                   |
| Temperature/K                               | 100                                                      |
| Crystal system                              | monoclinic                                               |
| Space group                                 | P2 <sub>1</sub> /n                                       |
| a/Å                                         | 11.3252(7)                                               |
| b/Å                                         | 14.1954(9)                                               |
| c/Å                                         | 16.8724(10)                                              |
| α/°                                         | 90                                                       |
| β/°                                         | 103.169(3)                                               |
| γ/°                                         | 90                                                       |
| Volume/Å <sup>3</sup>                       | 2641.2(3)                                                |
| Z                                           | 4                                                        |
| ρ <sub>calc</sub> /g/cm <sup>3</sup>        | 1.203                                                    |
| μ/mm <sup>-1</sup>                          | 0.746                                                    |
| F(000)                                      | 1032.0                                                   |
| Crystal size/mm <sup>3</sup>                | 0.456 × 0.372 × 0.22                                     |
| Radiation                                   | MoKα (λ = 0.71073)                                       |
| 2θ range for data collection/°              | 5.74 to 65.55                                            |
| Index ranges                                | -17 ≤ h ≤ 16, 0 ≤ k ≤ 21, 0 ≤ l ≤ 25                     |
| Reflections collected                       | 9679                                                     |
| Independent reflections                     | 9679 [R <sub>int</sub> = ?, R <sub>sigma</sub> = 0.0401] |
| Data/restraints/parameters                  | 9679/0/243                                               |
| Goodness-of-fit on F <sup>2</sup>           | 1.047                                                    |
| Final R indexes [I ≥ 2σ (I)]                | R <sub>1</sub> = 0.0337, wR <sub>2</sub> = 0.0713        |
| Final R indexes [all data]                  | R <sub>1</sub> = 0.0490, wR <sub>2</sub> = 0.0775        |
| Largest diff. peak/hole / e Å <sup>-3</sup> | 0.48/-0.38                                               |

**Table S5.** Crystal and structure refinement data for [(dmpe)<sub>2</sub>Mn(μ-H)<sub>2</sub>BMes<sub>2</sub>] (**5**).

|                                             |                                                          |
|---------------------------------------------|----------------------------------------------------------|
| Identification code                         | MnH_BMes2                                                |
| Empirical formula                           | C <sub>30</sub> H <sub>56</sub> BMnP <sub>4</sub>        |
| Formula weight                              | 606.37                                                   |
| Temperature/K                               | 100                                                      |
| Crystal system                              | triclinic                                                |
| Space group                                 | P-1                                                      |
| a/Å                                         | 10.068(3)                                                |
| b/Å                                         | 12.286(3)                                                |
| c/Å                                         | 13.967(3)                                                |
| α/°                                         | 90.611(4)                                                |
| β/°                                         | 101.870(5)                                               |
| γ/°                                         | 104.056(5)                                               |
| Volume/Å <sup>3</sup>                       | 1636.7(7)                                                |
| Z                                           | 2                                                        |
| ρ <sub>calc</sub> /g/cm <sup>3</sup>        | 1.230                                                    |
| μ/mm <sup>-1</sup>                          | 0.617                                                    |
| F(000)                                      | 652.0                                                    |
| Crystal size/mm <sup>3</sup>                | 0.198 × 0.164 × 0.072                                    |
| Radiation                                   | MoKα (λ = 0.71073)                                       |
| 2θ range for data collection/°              | 2.986 to 56.87                                           |
| Index ranges                                | -13 ≤ h ≤ 12, -16 ≤ k ≤ 16, 0 ≤ l ≤ 18                   |
| Reflections collected                       | 7863                                                     |
| Independent reflections                     | 7863 [R <sub>int</sub> = ?, R <sub>sigma</sub> = 0.0562] |
| Data/restraints/parameters                  | 7863/0/348                                               |
| Goodness-of-fit on F <sup>2</sup>           | 1.045                                                    |
| Final R indexes [I ≥ 2σ (I)]                | R <sub>1</sub> = 0.0468, wR <sub>2</sub> = 0.0885        |
| Final R indexes [all data]                  | R <sub>1</sub> = 0.0798, wR <sub>2</sub> = 0.0995        |
| Largest diff. peak/hole / e Å <sup>-3</sup> | 0.55/-0.44                                               |

**Table S6.** Crystal and structure refinement data for *trans,trans*-[ $\{(dmpe)_2MnH\}_2(\mu-dmpe)$ ] (*trans,trans*-6).

|                                             |                                                                 |
|---------------------------------------------|-----------------------------------------------------------------|
| Identification code                         | MnHdmpe_bridging_trans                                          |
| Empirical formula                           | C <sub>30</sub> H <sub>82</sub> Mn <sub>2</sub> P <sub>10</sub> |
| Formula weight                              | 862.53                                                          |
| Temperature/K                               | 100                                                             |
| Crystal system                              | monoclinic                                                      |
| Space group                                 | P2 <sub>1</sub> /c                                              |
| a/Å                                         | 13.8329(9)                                                      |
| b/Å                                         | 14.9650(10)                                                     |
| c/Å                                         | 11.0995(7)                                                      |
| α/°                                         | 90                                                              |
| β/°                                         | 102.760(3)                                                      |
| γ/°                                         | 90                                                              |
| Volume/Å <sup>3</sup>                       | 2241.0(3)                                                       |
| Z                                           | 2                                                               |
| ρ <sub>calc</sub> /cm <sup>3</sup>          | 1.278                                                           |
| μ/mm <sup>-1</sup>                          | 0.940                                                           |
| F(000)                                      | 924.0                                                           |
| Crystal size/mm <sup>3</sup>                | 0.437 × 0.361 × 0.238                                           |
| Radiation                                   | MoKα (λ = 0.71073)                                              |
| 2θ range for data collection/°              | 5.444 to 80.486                                                 |
| Index ranges                                | -25 ≤ h ≤ 25, -27 ≤ k ≤ 27, -20 ≤ l ≤ 20                        |
| Reflections collected                       | 106256                                                          |
| Independent reflections                     | 14051 [R <sub>int</sub> = 0.0441, R <sub>sigma</sub> = 0.0286]  |
| Data/restraints/parameters                  | 14051/0/204                                                     |
| Goodness-of-fit on F <sup>2</sup>           | 1.034                                                           |
| Final R indexes [I ≥ 2σ (I)]                | R <sub>1</sub> = 0.0278, wR <sub>2</sub> = 0.0612               |
| Final R indexes [all data]                  | R <sub>1</sub> = 0.0418, wR <sub>2</sub> = 0.0672               |
| Largest diff. peak/hole / e Å <sup>-3</sup> | 0.61/-0.33                                                      |

**Table S7.** Crystal and structure refinement data for *cis,cis*-[ $\{(dmpe)_2MnH\}_2(\mu-dmpe)$ ] (*cis,cis*-6).

|                                             |                                                                 |
|---------------------------------------------|-----------------------------------------------------------------|
| Identification code                         | MnHdmpe_bridging_cis                                            |
| Empirical formula                           | C <sub>30</sub> H <sub>82</sub> Mn <sub>2</sub> P <sub>10</sub> |
| Formula weight                              | 862.53                                                          |
| Temperature/K                               | 100                                                             |
| Crystal system                              | monoclinic                                                      |
| Space group                                 | P2 <sub>1</sub> /n                                              |
| a/Å                                         | 15.392(2)                                                       |
| b/Å                                         | 10.4309(14)                                                     |
| c/Å                                         | 28.529(4)                                                       |
| α/°                                         | 90                                                              |
| β/°                                         | 98.652(2)                                                       |
| γ/°                                         | 90                                                              |
| Volume/Å <sup>3</sup>                       | 4528.2(10)                                                      |
| Z                                           | 4                                                               |
| ρ <sub>calc</sub> /g/cm <sup>3</sup>        | 1.265                                                           |
| μ/mm <sup>-1</sup>                          | 0.931                                                           |
| F(000)                                      | 1848.0                                                          |
| Crystal size/mm <sup>3</sup>                | 0.27 × 0.143 × 0.125                                            |
| Radiation                                   | MoKα (λ = 0.71073)                                              |
| 2θ range for data collection/°              | 2.676 to 58.4                                                   |
| Index ranges                                | -21 ≤ h ≤ 21, -14 ≤ k ≤ 14, -39 ≤ l ≤ 38                        |
| Reflections collected                       | 56722                                                           |
| Independent reflections                     | 12351 [R <sub>int</sub> = 0.0898, R <sub>sigma</sub> = 0.0918]  |
| Data/restraints/parameters                  | 12351/870/486                                                   |
| Goodness-of-fit on F <sup>2</sup>           | 1.019                                                           |
| Final R indexes [I ≥ 2σ (I)]                | R <sub>1</sub> = 0.1092, wR <sub>2</sub> = 0.2817               |
| Final R indexes [all data]                  | R <sub>1</sub> = 0.1648, wR <sub>2</sub> = 0.3234               |
| Largest diff. peak/hole / e Å <sup>-3</sup> | 2.30/-1.35                                                      |

**Table S8.** Crystal and structure refinement data for *trans*-[(dmpe)<sub>2</sub>MnH( $\kappa_1$ -dmpe)] (***trans*-7**).

|                                             |                                                                |
|---------------------------------------------|----------------------------------------------------------------|
| Identification code                         | MnHdmpe3_trans                                                 |
| Empirical formula                           | C <sub>18</sub> H <sub>49</sub> MnP <sub>6</sub>               |
| Formula weight                              | 506.36                                                         |
| Temperature/K                               | 100                                                            |
| Crystal system                              | monoclinic                                                     |
| Space group                                 | P2 <sub>1</sub>                                                |
| a/Å                                         | 20.562(4)                                                      |
| b/Å                                         | 9.4569(18)                                                     |
| c/Å                                         | 28.035(5)                                                      |
| $\alpha$ /°                                 | 90                                                             |
| $\beta$ /°                                  | 90.843(4)                                                      |
| $\gamma$ /°                                 | 90                                                             |
| Volume/Å <sup>3</sup>                       | 5451.0(18)                                                     |
| Z                                           | 8                                                              |
| $\rho_{\text{calc}}$ /cm <sup>3</sup>       | 1.234                                                          |
| $\mu$ /mm <sup>-1</sup>                     | 0.839                                                          |
| F(000)                                      | 2176.0                                                         |
| Crystal size/mm <sup>3</sup>                | 0.020 × 0.020 × 0.020                                          |
| Radiation                                   | MoK $\alpha$ ( $\lambda$ = 0.71073)                            |
| 2 $\theta$ range for data collection/°      | 3.492 to 56.508                                                |
| Index ranges                                | -27 ≤ h ≤ 27, -12 ≤ k ≤ 12, -37 ≤ l ≤ 37                       |
| Reflections collected                       | 85573                                                          |
| Independent reflections                     | 26856 [R <sub>int</sub> = 0.2398, R <sub>sigma</sub> = 0.5649] |
| Data/restraints/parameters                  | 26856/910/959                                                  |
| Goodness-of-fit on F <sup>2</sup>           | 0.644                                                          |
| Final R indexes [ $ I  \geq 2\sigma(I)$ ]   | R <sub>1</sub> = 0.0888, wR <sub>2</sub> = 0.0771              |
| Final R indexes [all data]                  | R <sub>1</sub> = 0.2458, wR <sub>2</sub> = 0.1006              |
| Largest diff. peak/hole / e Å <sup>-3</sup> | 0.98/-0.78                                                     |
| Flack parameter                             | 0.46(3)                                                        |

**Table S9.** Crystal and structure refinement data for *trans*-[(dmpe)<sub>2</sub>MnH(PMe<sub>3</sub>)] (***trans*-8**).

|                                             |                                                               |
|---------------------------------------------|---------------------------------------------------------------|
| Identification code                         | MnHPMe3_trans                                                 |
| Empirical formula                           | C <sub>15</sub> H <sub>42</sub> MnP <sub>5</sub>              |
| Formula weight                              | 432.27                                                        |
| Temperature/K                               | 100                                                           |
| Crystal system                              | triclinic                                                     |
| Space group                                 | P-1                                                           |
| a/Å                                         | 9.2251(10)                                                    |
| b/Å                                         | 9.4251(10)                                                    |
| c/Å                                         | 15.1932(16)                                                   |
| α/°                                         | 91.032(3)                                                     |
| β/°                                         | 106.889(3)                                                    |
| γ/°                                         | 113.056(3)                                                    |
| Volume/Å <sup>3</sup>                       | 1150.0(2)                                                     |
| Z                                           | 2                                                             |
| ρ <sub>calc</sub> /g/cm <sup>3</sup>        | 1.248                                                         |
| μ/mm <sup>-1</sup>                          | 0.916                                                         |
| F(000)                                      | 464.0                                                         |
| Crystal size/mm <sup>3</sup>                | 0.02 × 0.02 × 0.01                                            |
| Radiation                                   | MoKα (λ = 0.71073)                                            |
| 2θ range for data collection/°              | 2.834 to 52.618                                               |
| Index ranges                                | -11 ≤ h ≤ 11, -11 ≤ k ≤ 11, -18 ≤ l ≤ 18                      |
| Reflections collected                       | 19746                                                         |
| Independent reflections                     | 4659 [R <sub>int</sub> = 0.1174, R <sub>sigma</sub> = 0.1203] |
| Data/restraints/parameters                  | 4659/0/205                                                    |
| Goodness-of-fit on F <sup>2</sup>           | 1.034                                                         |
| Final R indexes [I ≥ 2σ (I)]                | R <sub>1</sub> = 0.0674, wR <sub>2</sub> = 0.1023             |
| Final R indexes [all data]                  | R <sub>1</sub> = 0.1237, wR <sub>2</sub> = 0.1159             |
| Largest diff. peak/hole / e Å <sup>-3</sup> | 0.85/-0.75                                                    |



### Selected NMR Spectra for Complexes 3-8

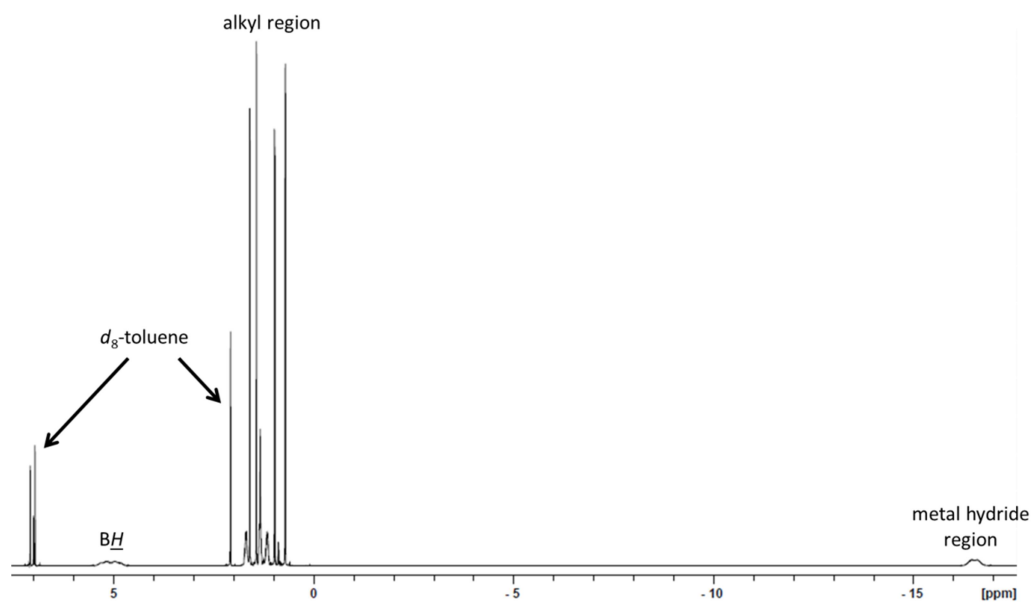

Figure S3.  $^1\text{H}$  NMR spectrum of  $[(\text{dmpe})_2\text{Mn}(\mu\text{-H})_2\text{BH}_2]$  (**3**) in  $d_8$ -toluene (600 MHz, 298 K).

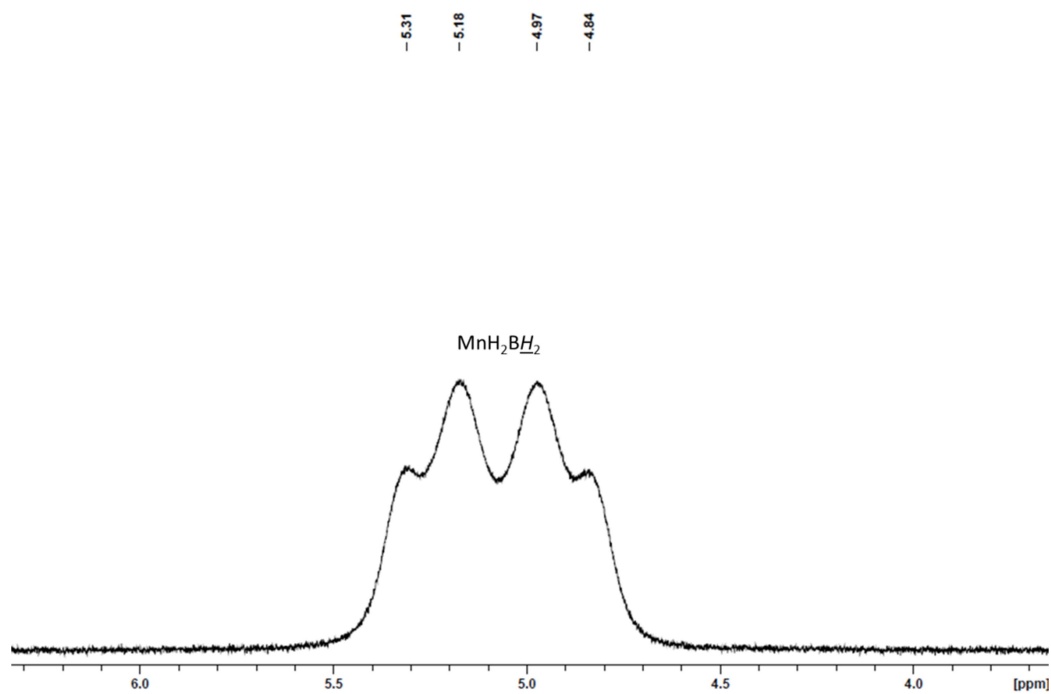

Figure S4. Expanded BH region of the  $^1\text{H}$  NMR spectrum of  $[(\text{dmpe})_2\text{Mn}(\mu\text{-H})_2\text{BH}_2]$  (**3**) in  $d_8$ -toluene (600 MHz, 298 K).

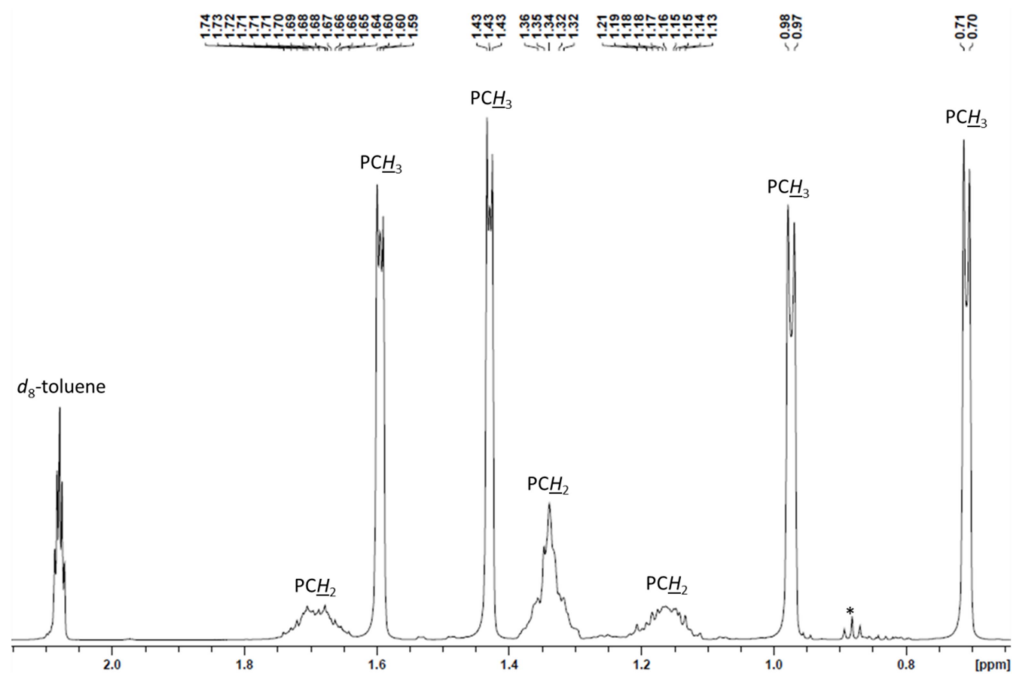

**Figure S5.** Expanded alkyl region of the  $^1\text{H}$  NMR spectrum of  $[(\text{dmpe})_2\text{Mn}(\mu\text{-H})_2\text{BH}_2]$  (**3**) in  $d_8$ -toluene (600 MHz, 298 K). \* indicates a peak from  $n$ -hexane.

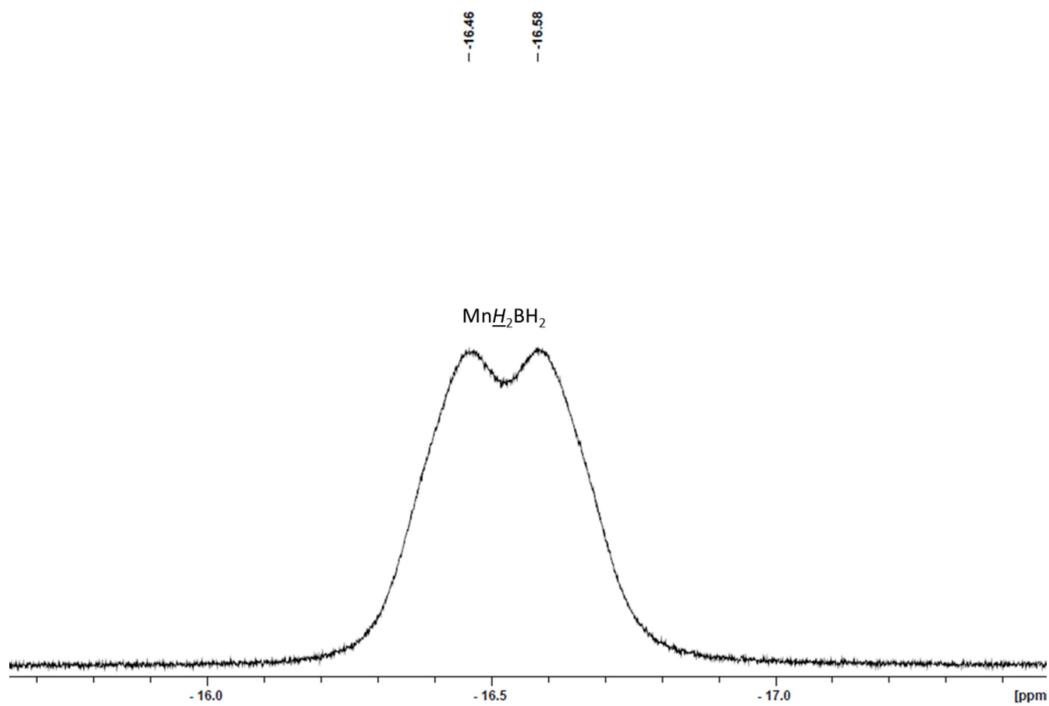

**Figure S6.** Expanded  $\text{MnH}$  region of the  $^1\text{H}$  NMR spectrum of  $[(\text{dmpe})_2\text{Mn}(\mu\text{-H})_2\text{BH}_2]$  (**3**) in  $d_8$ -toluene (600 MHz, 298 K).

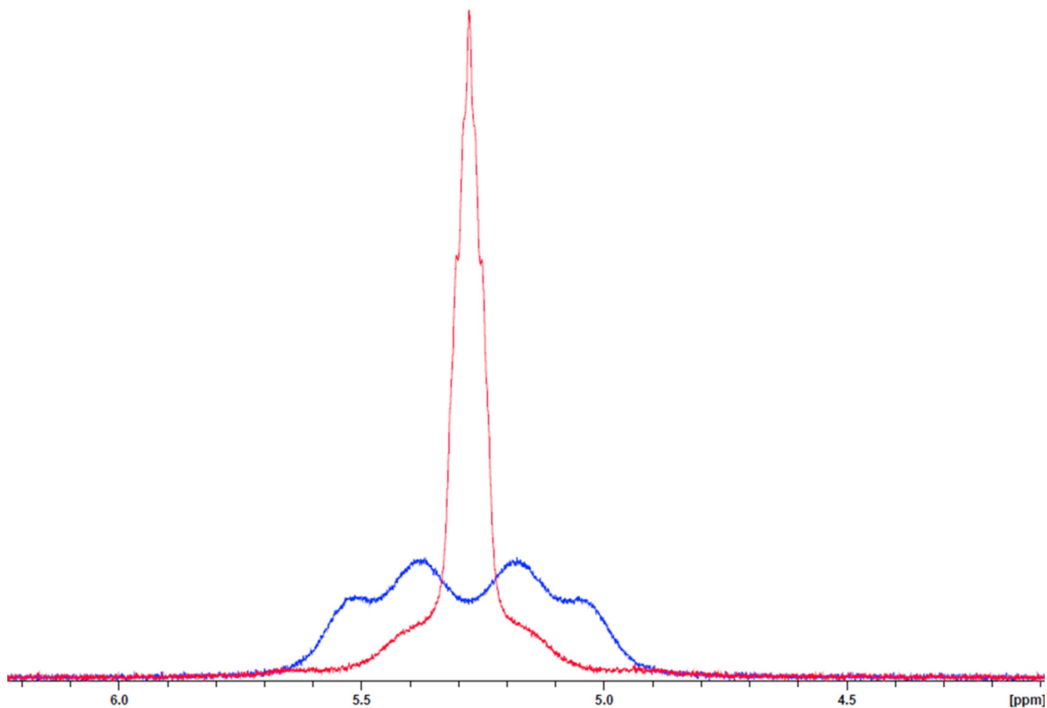

**Figure S7.** Expanded  $BH$  region of an overlay of the  $^1H$  (blue) and  $^1H\{^{11}B\}$  (red) NMR spectra of  $[(dmpe)_2Mn(\mu-H)_2BH_2]$  (**3**) in  $C_6D_6$  (600 MHz, 298 K).

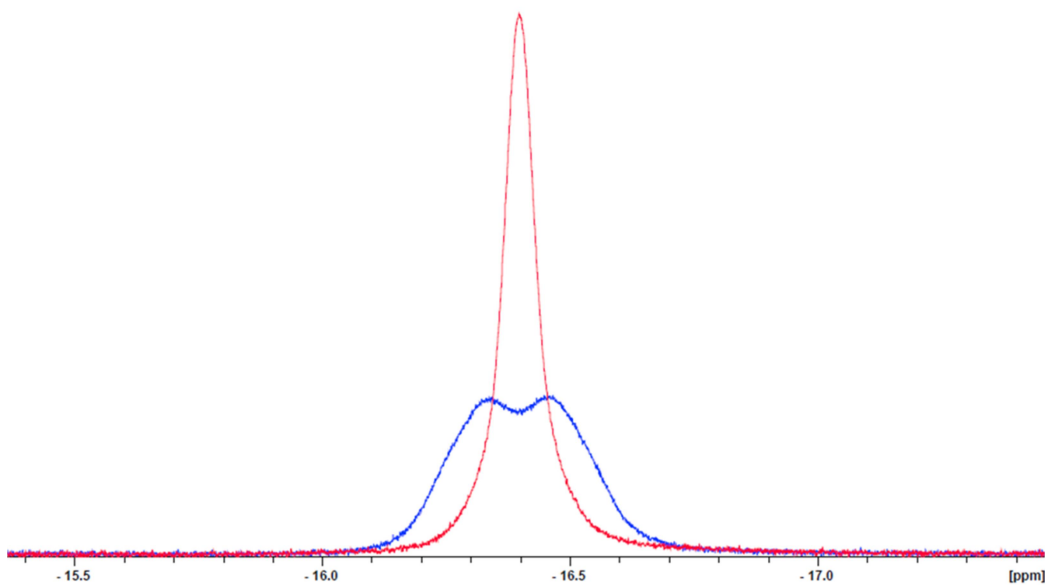

**Figure S8.** Expanded  $MnH$  region of an overlay of the  $^1H$  (blue) and  $^1H\{^{11}B\}$  (red) NMR spectra of  $[(dmpe)_2Mn(\mu-H)_2BH_2]$  (**3**) in  $C_6D_6$  (600 MHz, 298 K).

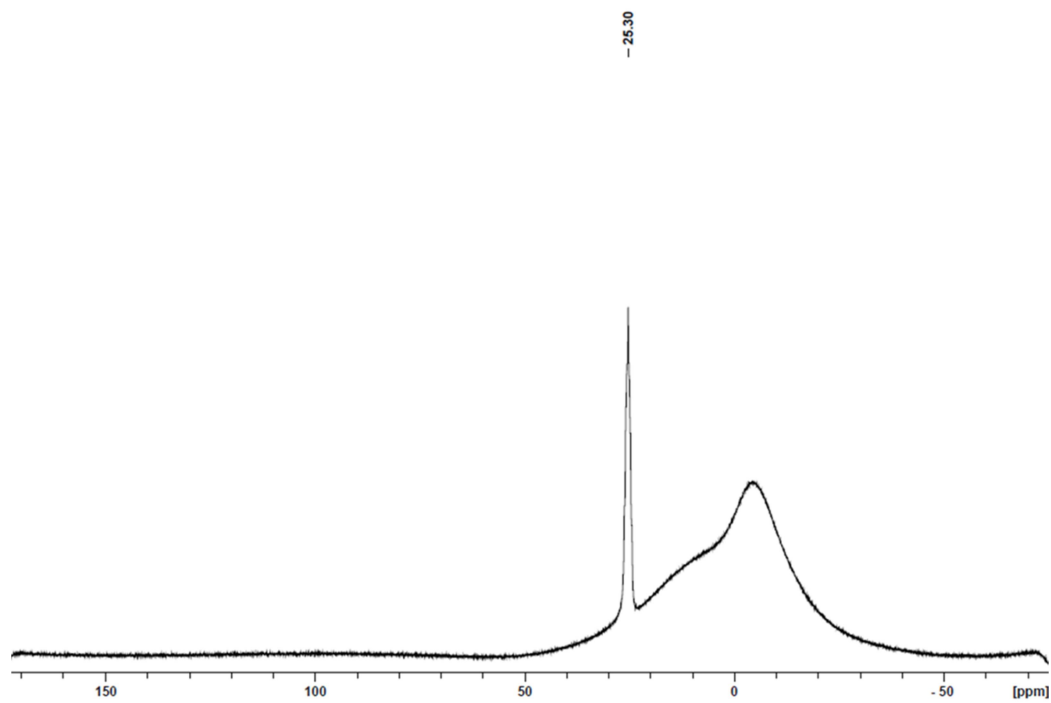

**Figure S9.**  $^{11}\text{B}\{^1\text{H}\}$  NMR spectrum of  $[(\text{dmpe})_2\text{Mn}(\mu\text{-H})_2\text{BH}_2]$  (**3**) in  $d_8$ -toluene (192 MHz, 298 K).

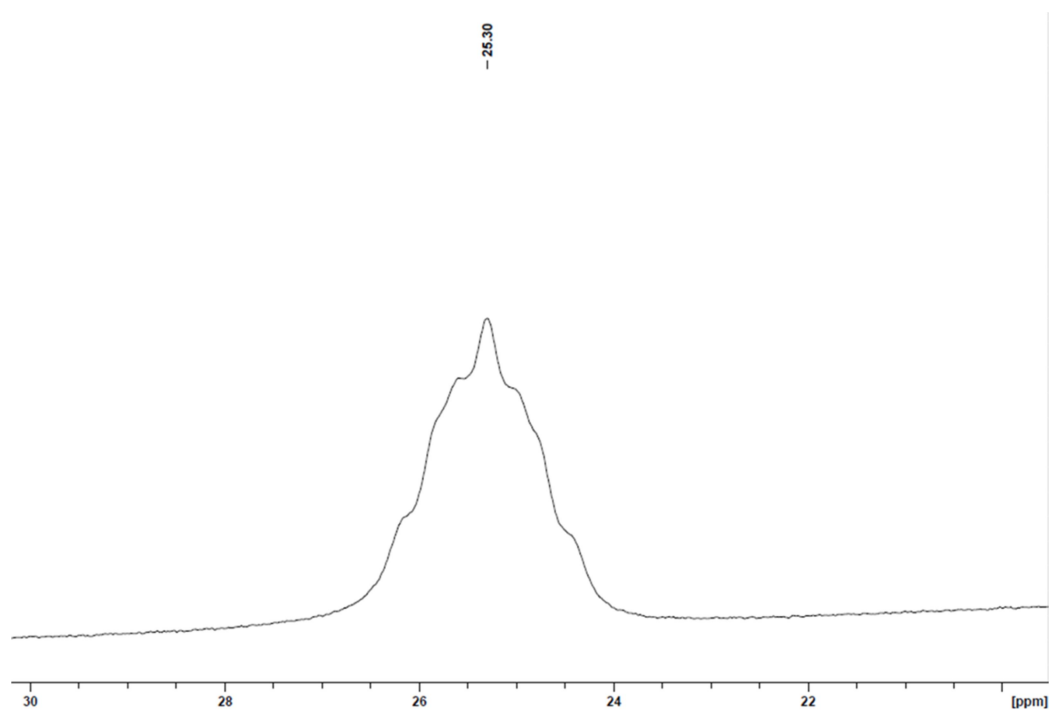

**Figure S10.** Expanded signal-containing region of the  $^{11}\text{B}\{^1\text{H}\}$  NMR spectrum of  $[(\text{dmpe})_2\text{Mn}(\mu\text{-H})_2\text{BH}_2]$  (**3**) in  $d_8$ -toluene (192 MHz, 298 K).

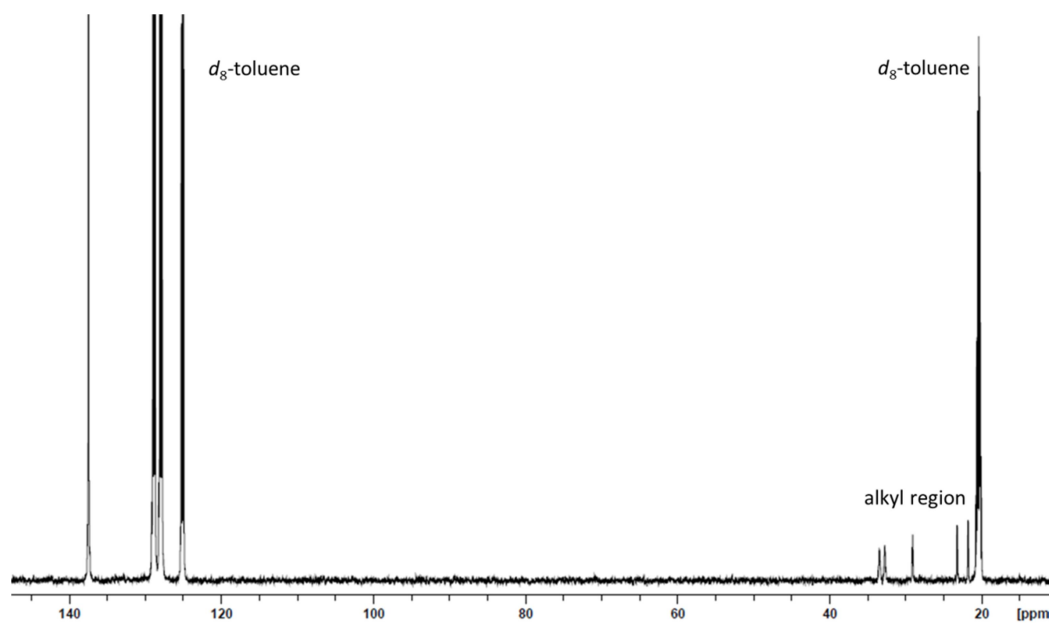

**Figure S11.**  $^{13}\text{C}\{^1\text{H}\}$  NMR spectrum of  $[(\text{dmpe})_2\text{Mn}(\mu\text{-H})_2\text{BH}_2]$  (**3**) in  $d_8$ -toluene (151 MHz, 298 K).

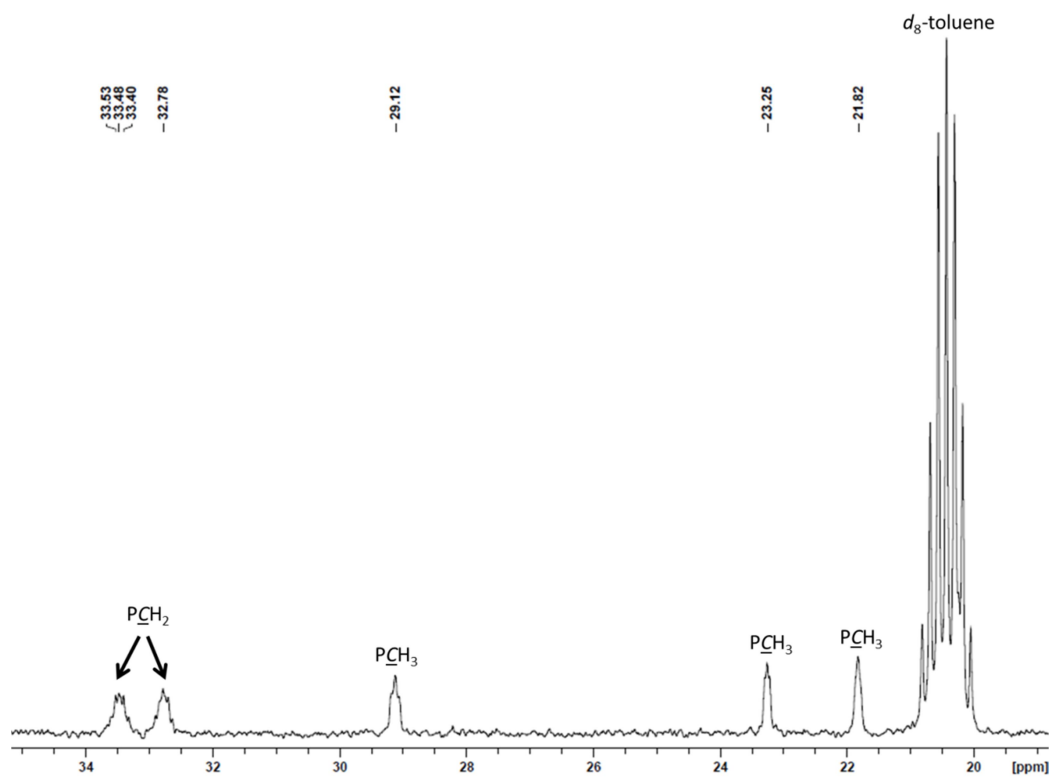

**Figure S12.** Expanded alkyl region of the  $^{13}\text{C}\{^1\text{H}\}$  NMR spectrum of  $[(\text{dmpe})_2\text{Mn}(\mu\text{-H})_2\text{BH}_2]$  (**3**) in  $d_8$ -toluene (151 MHz, 298 K).

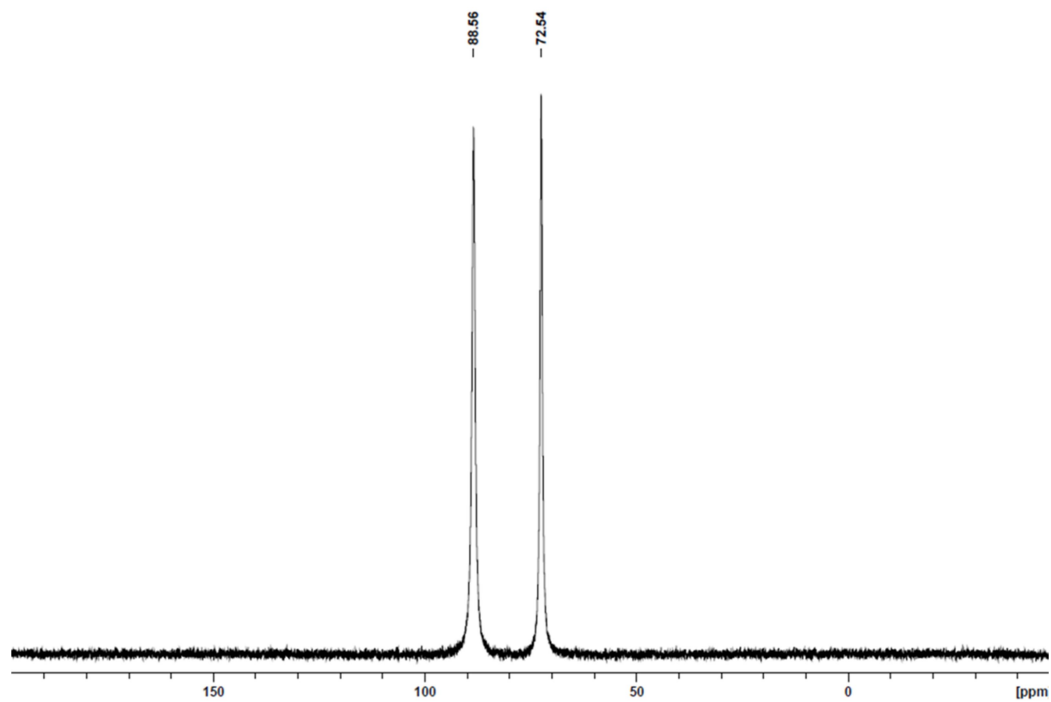

**Figure S13.**  $^{31}\text{P}\{^1\text{H}\}$  NMR spectrum of  $[(\text{dmpe})_2\text{Mn}(\mu\text{-H})_2\text{BH}_2]$  (**3**) in  $d_8$ -toluene (243 MHz, 298 K).

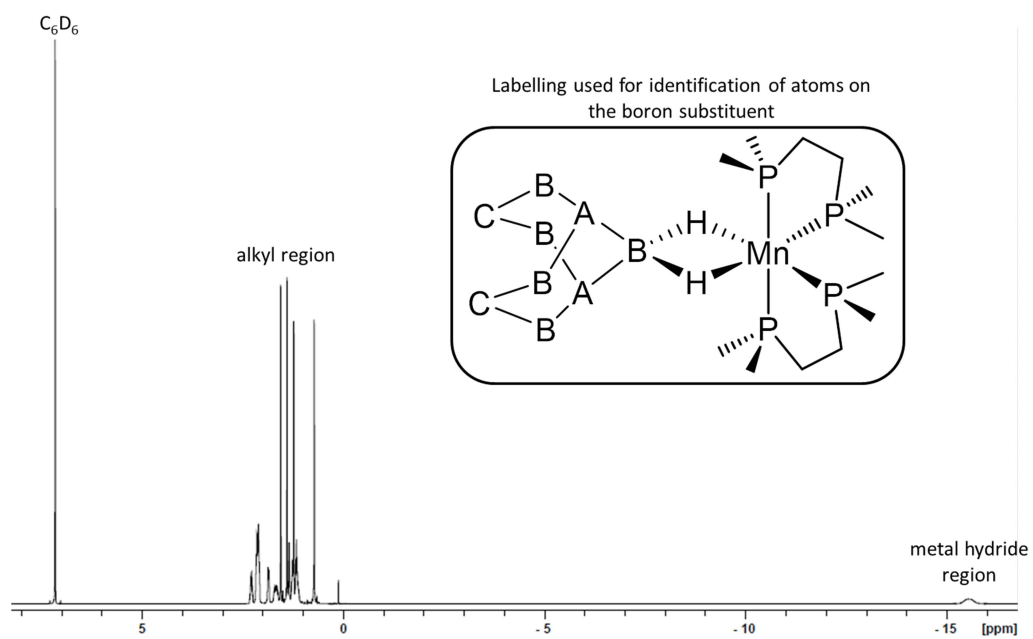

**Figure S14.**  $^1\text{H}$  NMR spectrum of  $[(\text{dmpe})_2\text{Mn}(\mu\text{-H})_2\text{BC}_8\text{H}_{14}]$  (**4**) in  $\text{C}_6\text{D}_6$  (600 MHz, 298 K).

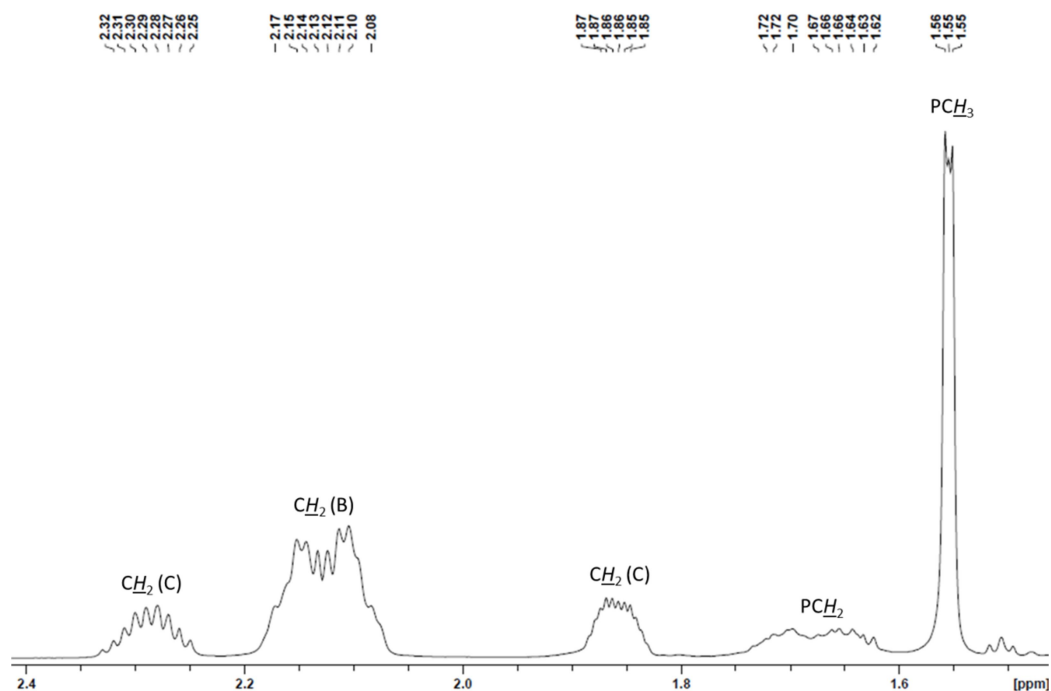

**Figure S15.** Expanded high frequency portion of the alkyl region of the  $^1H$  NMR spectrum of  $[(dmpe)_2Mn(\mu-H)_2BC_8H_{14}]$  (**4**) in  $C_6D_6$  (600 MHz, 298 K).

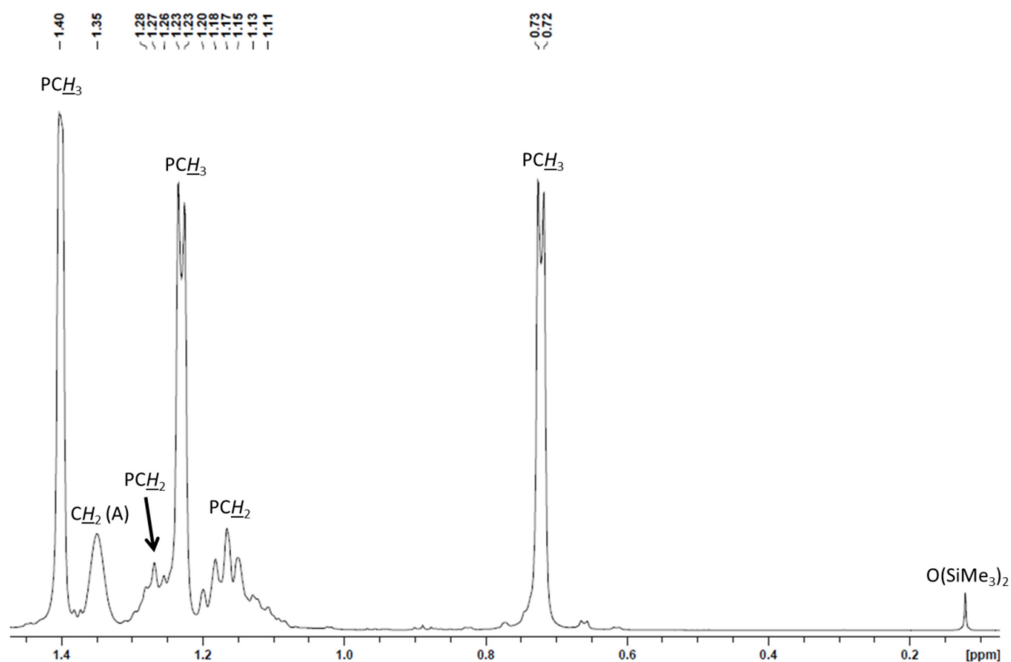

**Figure S16.** Expanded low frequency portion of the alkyl region of the  $^1H$  NMR spectrum of  $[(dmpe)_2Mn(\mu-H)_2BC_8H_{14}]$  (**4**) in  $C_6D_6$  (600 MHz, 298 K).

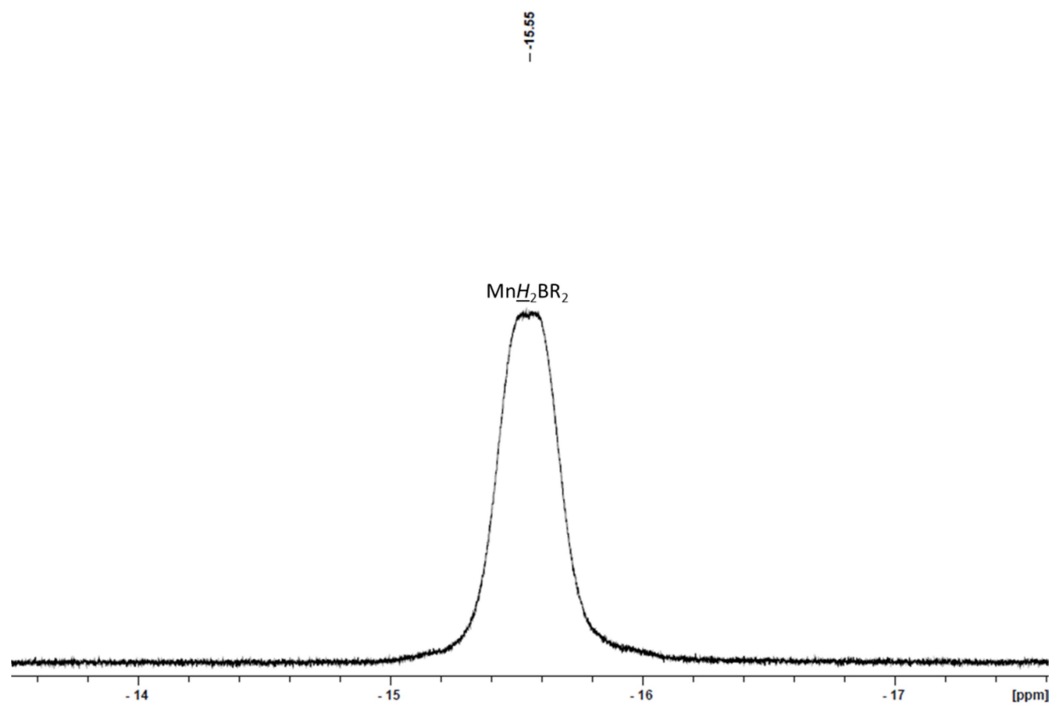

**Figure S17.** Expanded MnH region of the  $^1\text{H}$  NMR spectrum of  $[(\text{dmpe})_2\text{Mn}(\mu\text{-H})_2\text{BC}_8\text{H}_{14}]$  (**4**) in  $\text{C}_6\text{D}_6$  (600 MHz, 298 K).

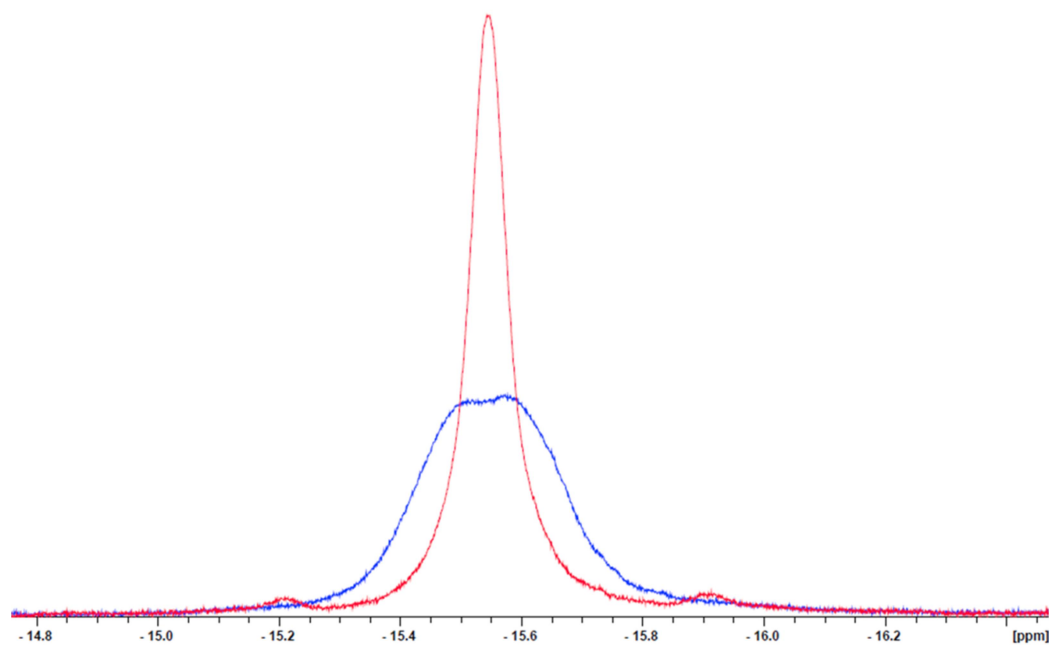

**Figure S18.** Expanded MnH region of an overlay of the  $^1\text{H}$  (blue) and  $^1\text{H}\{^{11}\text{B}\}$  (red) NMR spectra of  $[(\text{dmpe})_2\text{Mn}(\mu\text{-H})_2\text{BC}_8\text{H}_{14}]$  (**4**) in  $\text{C}_6\text{D}_6$  (600 MHz, 298 K).



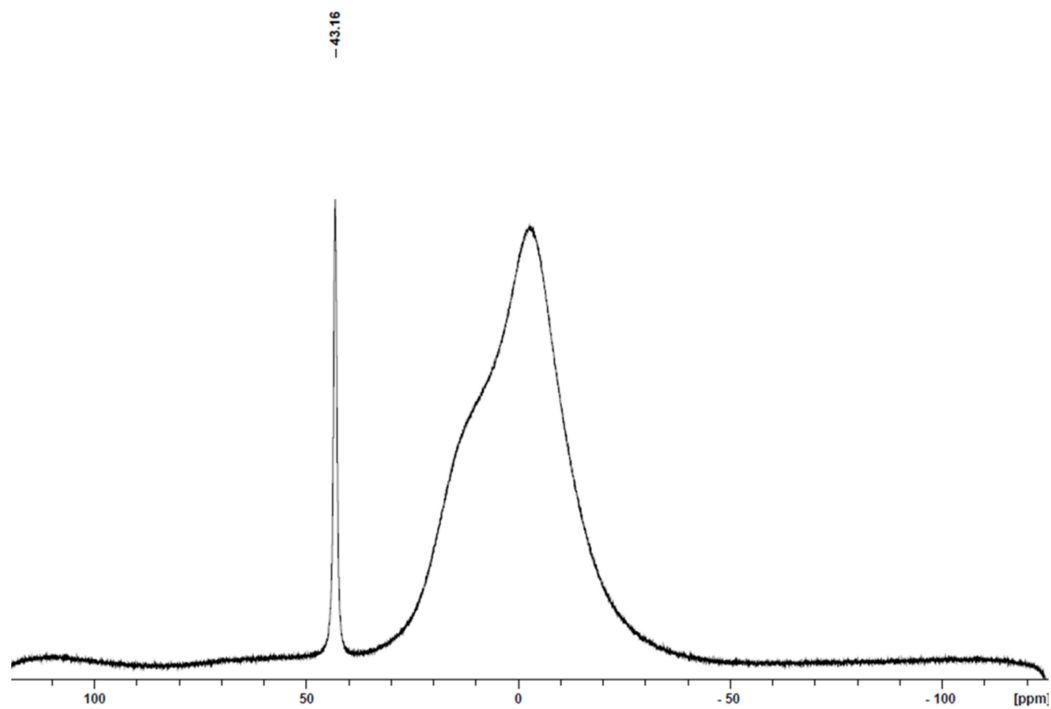

**Figure S19.**  $^{11}\text{B}\{^1\text{H}\}$  NMR spectrum of  $[(\text{dmpe})_2\text{Mn}(\mu\text{-H})_2\text{BC}_8\text{H}_{14}]$  (**4**) in  $\text{C}_6\text{D}_6$  (192 MHz, 298 K).

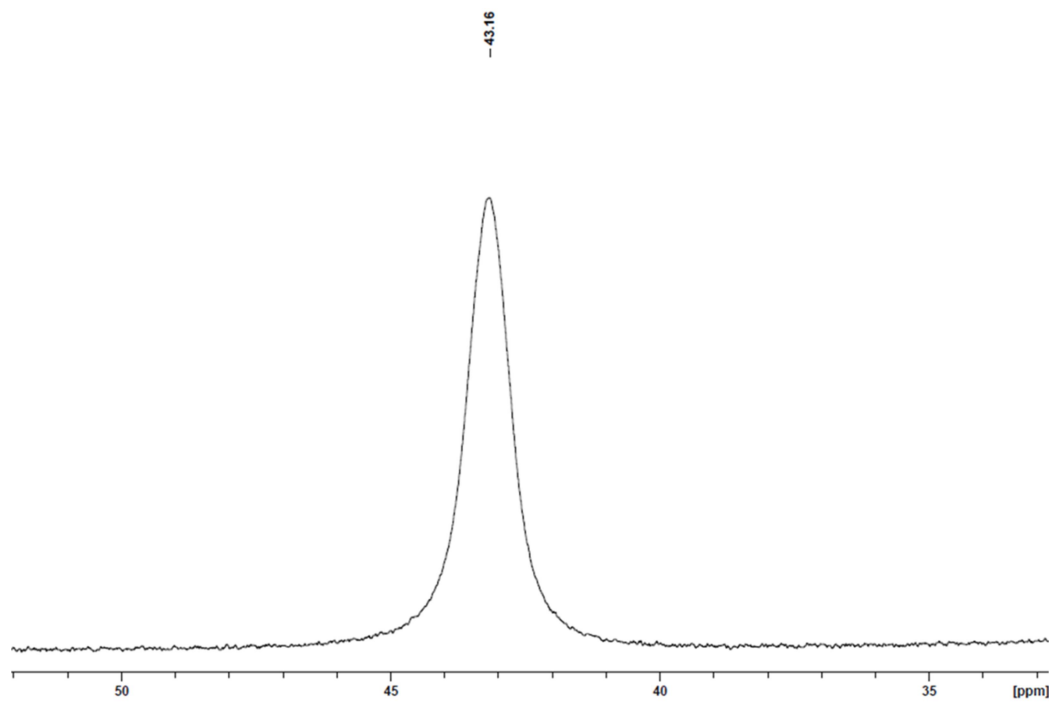

**Figure S20.** Expanded signal-containing region of the  $^{11}\text{B}\{^1\text{H}\}$  NMR spectrum of  $[(\text{dmpe})_2\text{Mn}(\mu\text{-H})_2\text{BC}_8\text{H}_{14}]$  (**4**) in  $\text{C}_6\text{D}_6$  (192 MHz, 298 K).

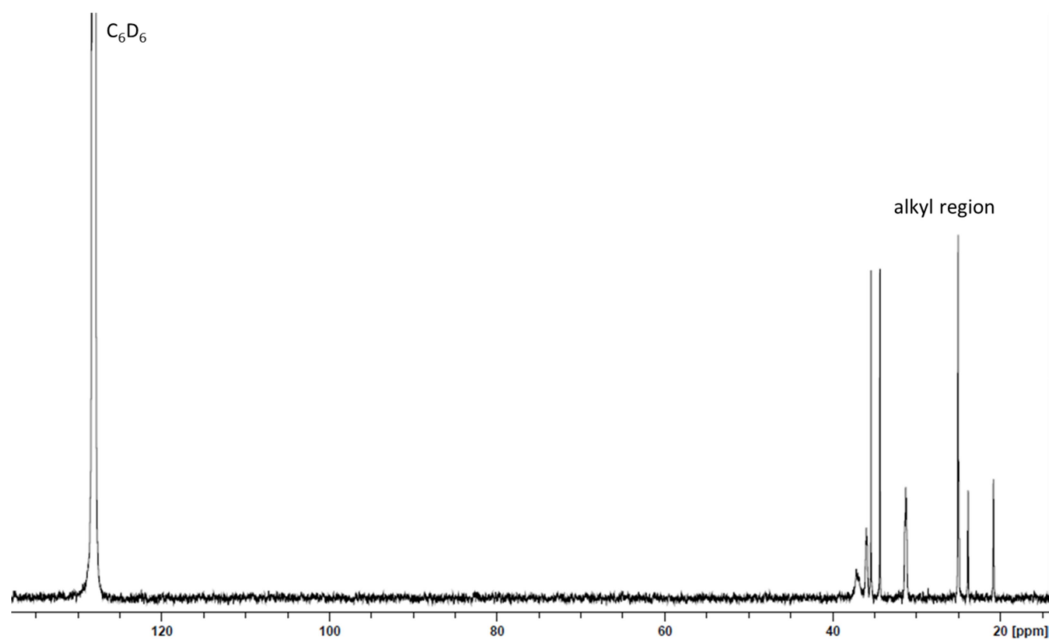

Figure S21.  $^{13}\text{C}\{^1\text{H}\}$  NMR spectrum of  $[(\text{dmpe})_2\text{Mn}(\mu\text{-H})_2\text{BC}_8\text{H}_{14}]$  (**4**) in  $\text{C}_6\text{D}_6$  (151 MHz, 298 K).

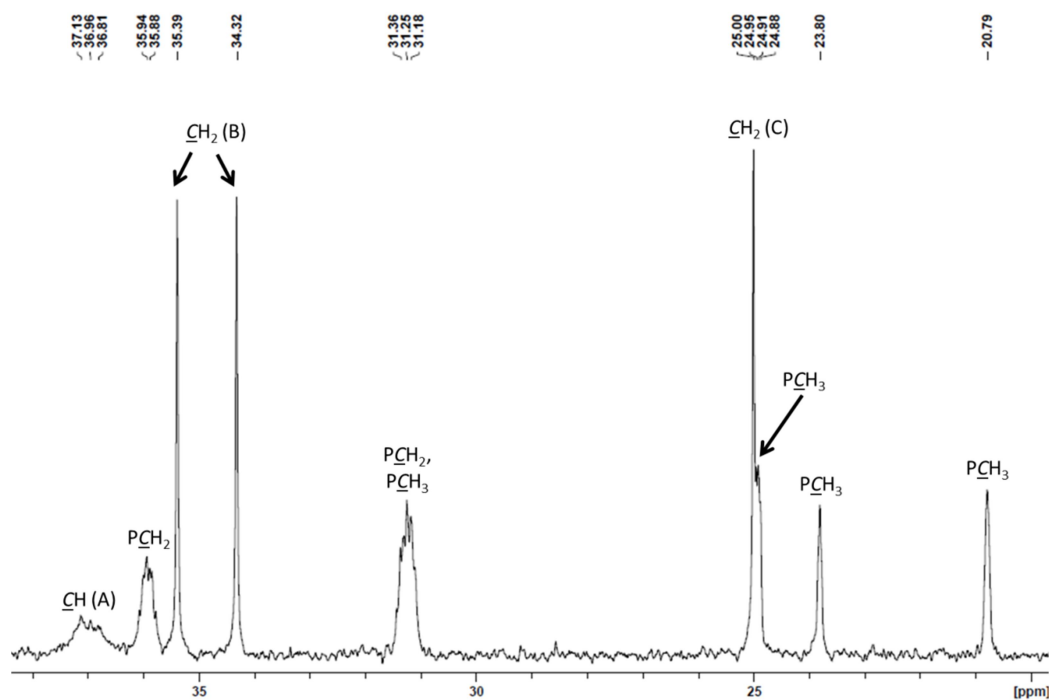

Figure S22. Expanded alkyl region of the  $^{13}\text{C}\{^1\text{H}\}$  NMR spectrum of  $[(\text{dmpe})_2\text{Mn}(\mu\text{-H})_2\text{BC}_8\text{H}_{14}]$  (**4**) in  $\text{C}_6\text{D}_6$  (151 MHz, 298 K).

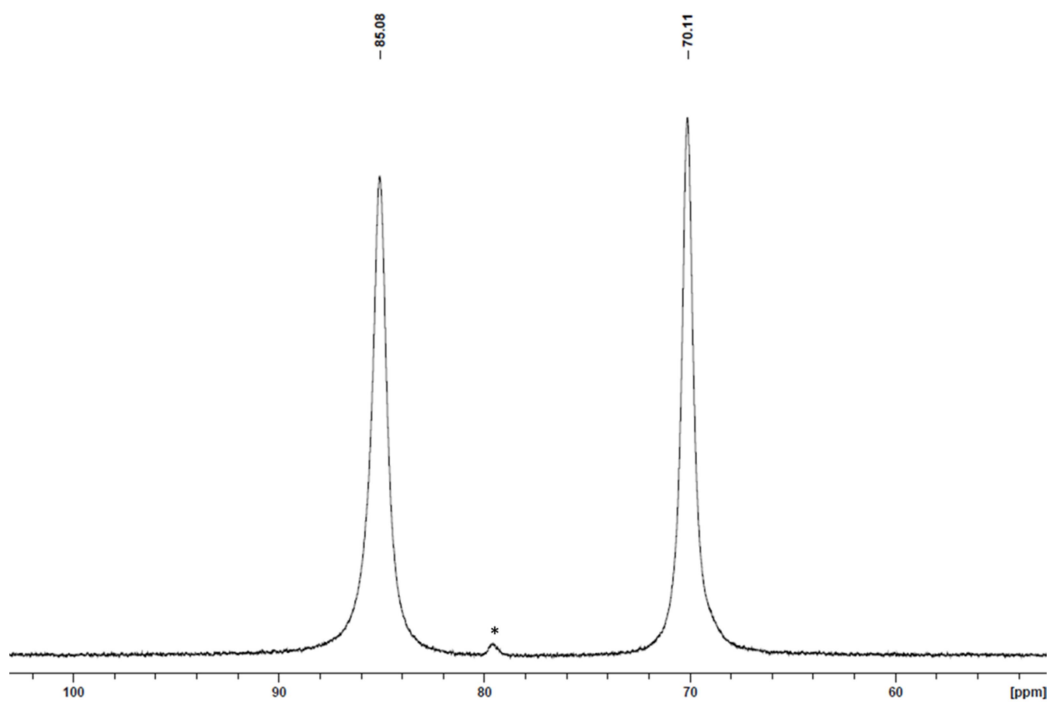

**Figure S23.**  $^{31}\text{P}\{^1\text{H}\}$  NMR spectrum of  $[(\text{dmpe})_2\text{Mn}(\mu\text{-H})_2\text{BC}_8\text{H}_{14}]$  (**4**) in  $\text{C}_6\text{D}_6$  (243 MHz, 298 K). \* indicates a signal from an impurity.

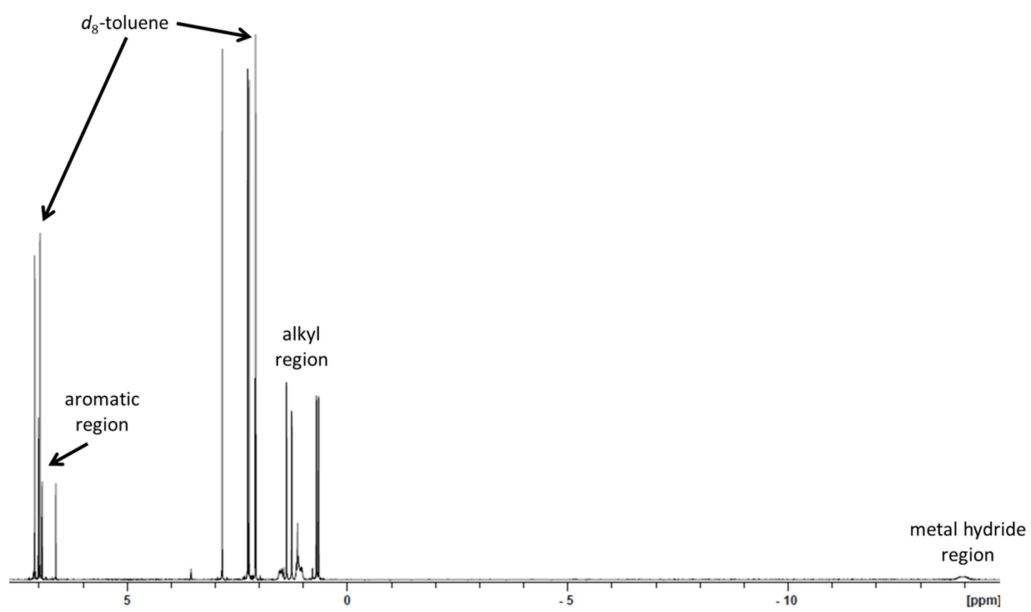

**Figure S24.**  $^1\text{H}$  NMR spectrum of  $[(\text{dmpe})_2\text{Mn}(\mu\text{-H})_2\text{BMe}_2]$  (**5**) in  $d_8$ -toluene (600 MHz, 298 K).

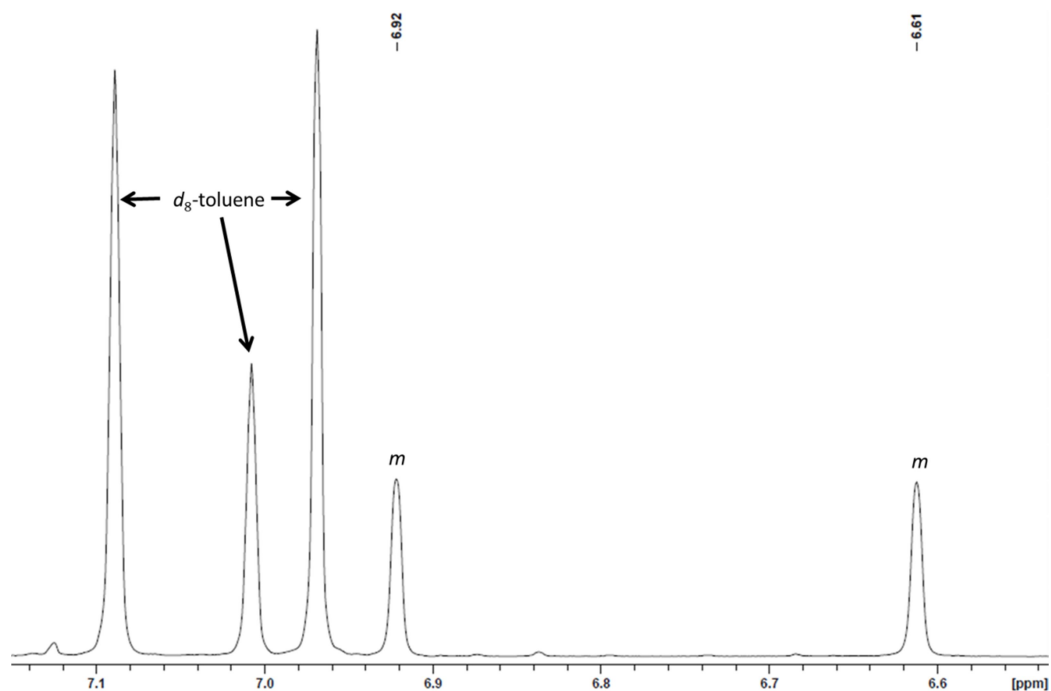

**Figure S25.** Expanded aromatic region of the  $^1\text{H}$  NMR spectrum of  $[(\text{dmpe})_2\text{Mn}(\mu\text{-H})_2\text{BMes}_2]$  (**5**) in  $d_8$ -toluene (600 MHz, 298 K).

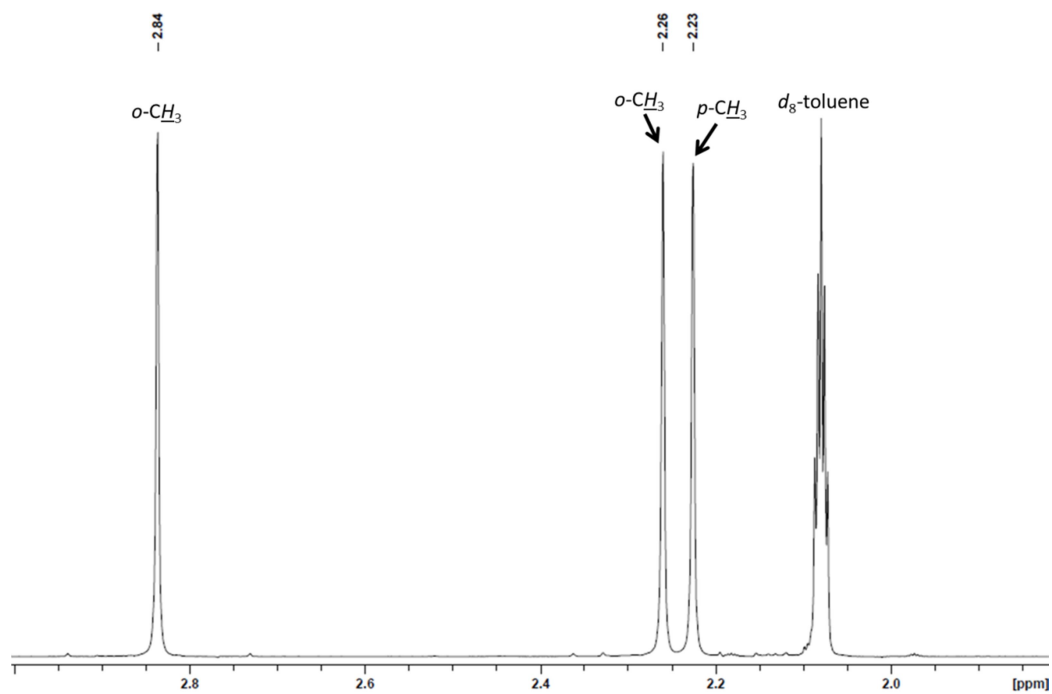

**Figure S26.** Expanded high frequency portion of the alkyl region of the  $^1\text{H}$  NMR spectrum of  $[(\text{dmpe})_2\text{Mn}(\mu\text{-H})_2\text{BMes}_2]$  (**5**) in  $d_8$ -toluene (600 MHz, 298 K).

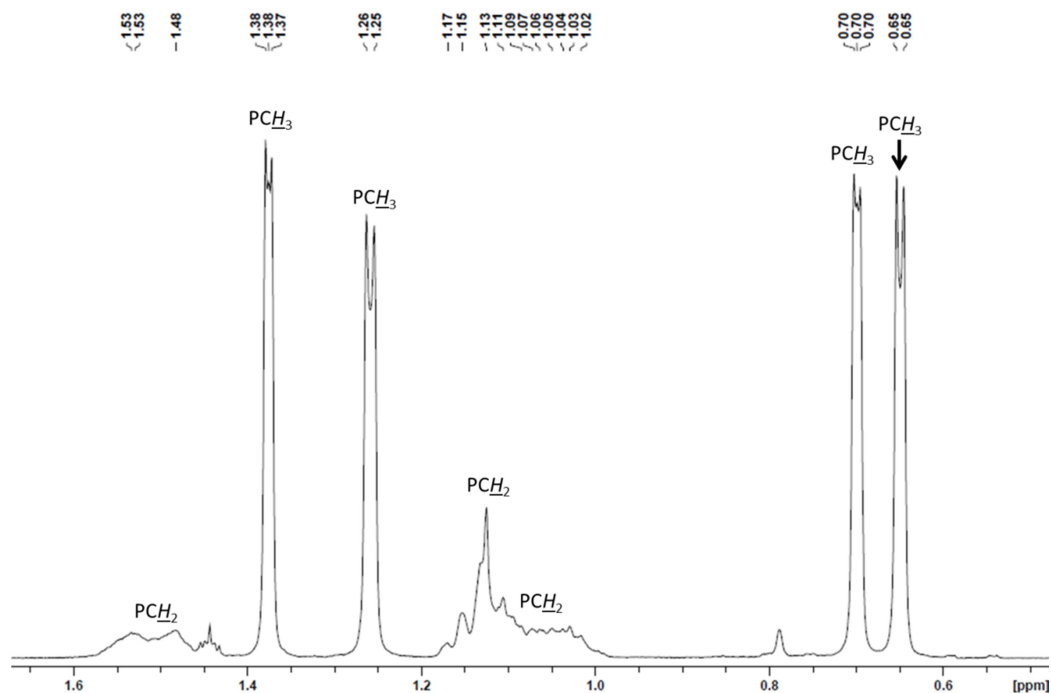

**Figure S27.** Expanded low frequency portion of the alkyl region of the  $^1\text{H}$  NMR spectrum of  $[(\text{dmpe})_2\text{Mn}(\mu\text{-H})_2\text{BMeS}_2]$  (**5**) in  $d_8$ -toluene (600 MHz, 298 K).

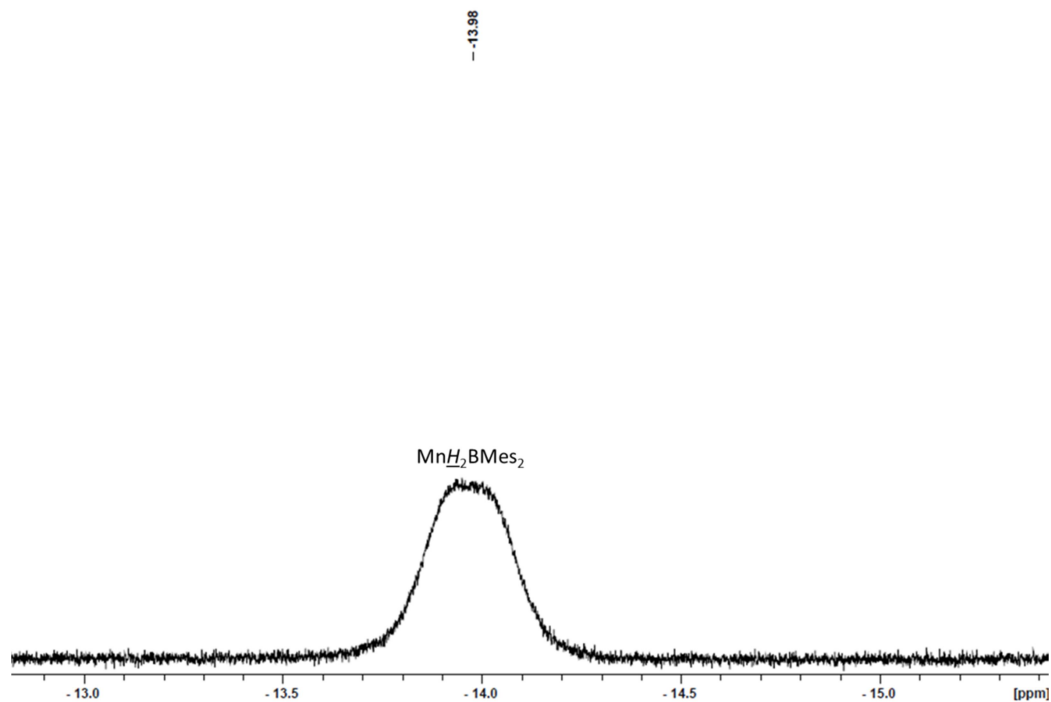

**Figure S28.** Expanded  $\text{MnH}$  region of the  $^1\text{H}$  NMR spectrum of  $[(\text{dmpe})_2\text{Mn}(\mu\text{-H})_2\text{BMeS}_2]$  (**5**) in  $d_8$ -toluene (600 MHz, 298 K).

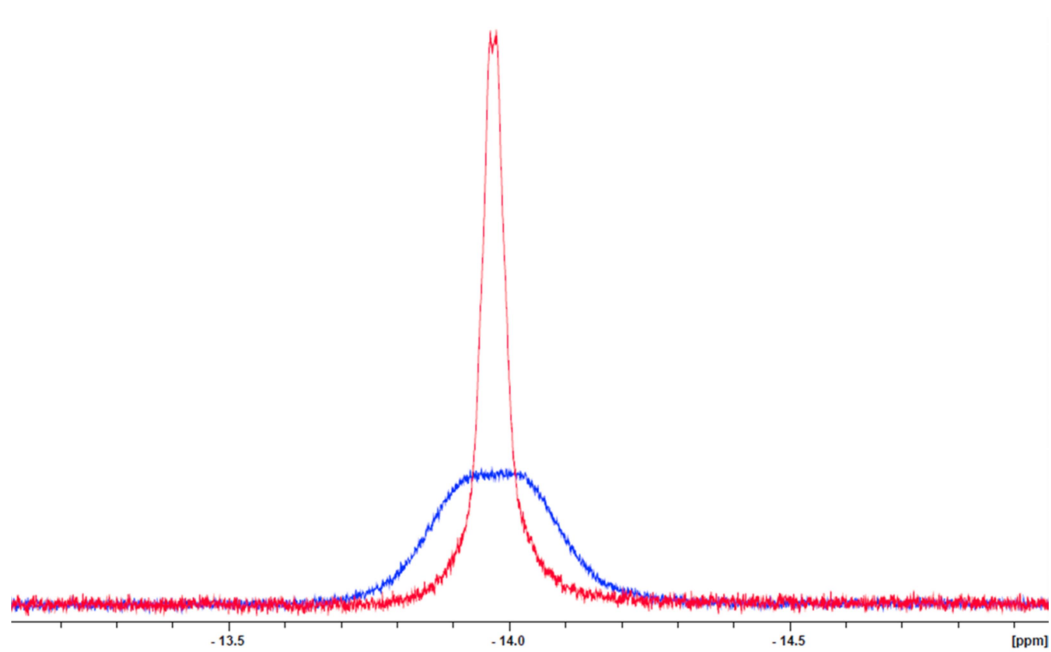

**Figure S29.** Expanded  $\text{MnH}$  region of an overlay of the  $^1\text{H}$  (blue) and  $^1\text{H}\{^{11}\text{B}\}$  (red) NMR spectra of  $[(\text{dmpe})_2\text{Mn}(\mu\text{-H})_2\text{BMes}_2]$  (**5**) in  $d_8$ -toluene (600 MHz, 298 K).

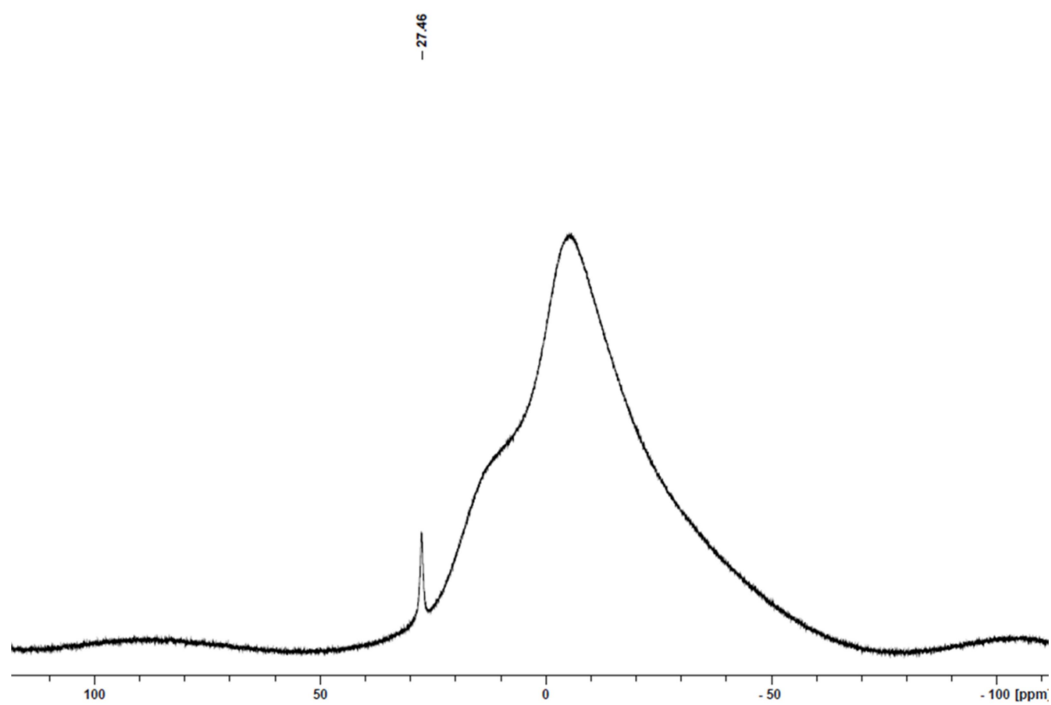

**Figure S30.**  $^{11}\text{B}\{^1\text{H}\}$  NMR spectrum of  $[(\text{dmpe})_2\text{Mn}(\mu\text{-H})_2\text{BMes}_2]$  (**5**) in  $d_8$ -toluene (192 MHz, 298 K).

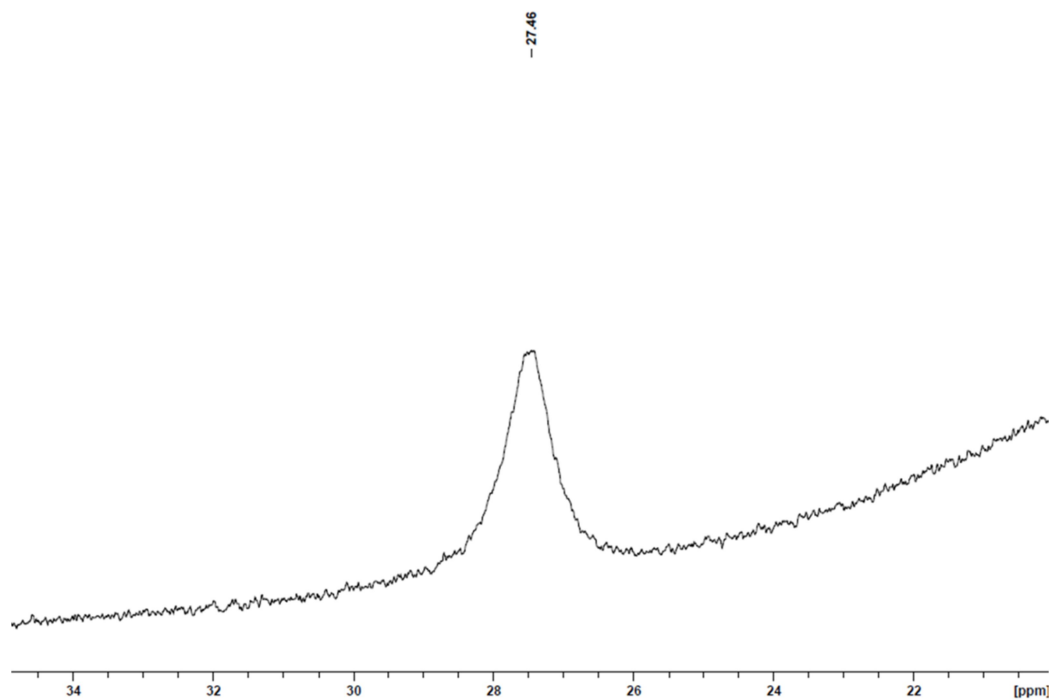

**Figure S31.** Expanded signal-containing region of the  $^{11}\text{B}\{^1\text{H}\}$  NMR spectrum of  $[(\text{dmpe})_2\text{Mn}(\mu\text{-H})_2\text{BMes}_2]$  (**5**) in  $d_8$ -toluene (192 MHz, 298 K).

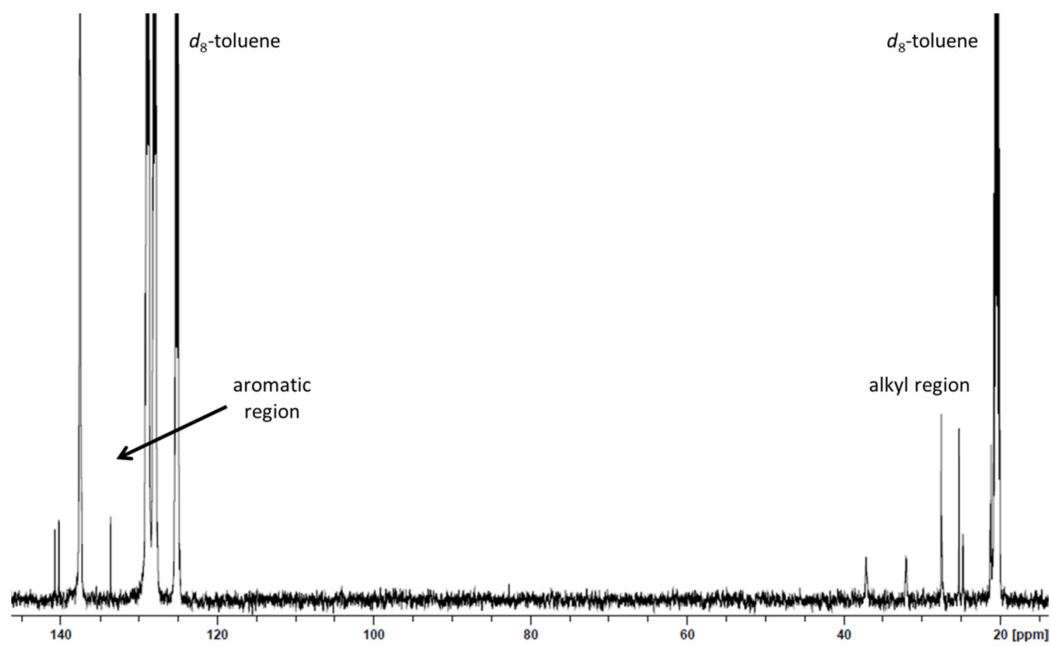

**Figure S32.**  $^{13}\text{C}\{^1\text{H}\}$  NMR spectrum of  $[(\text{dmpe})_2\text{Mn}(\mu\text{-H})_2\text{BMes}_2]$  (**5**) in  $d_8$ -toluene (151 MHz, 298 K).

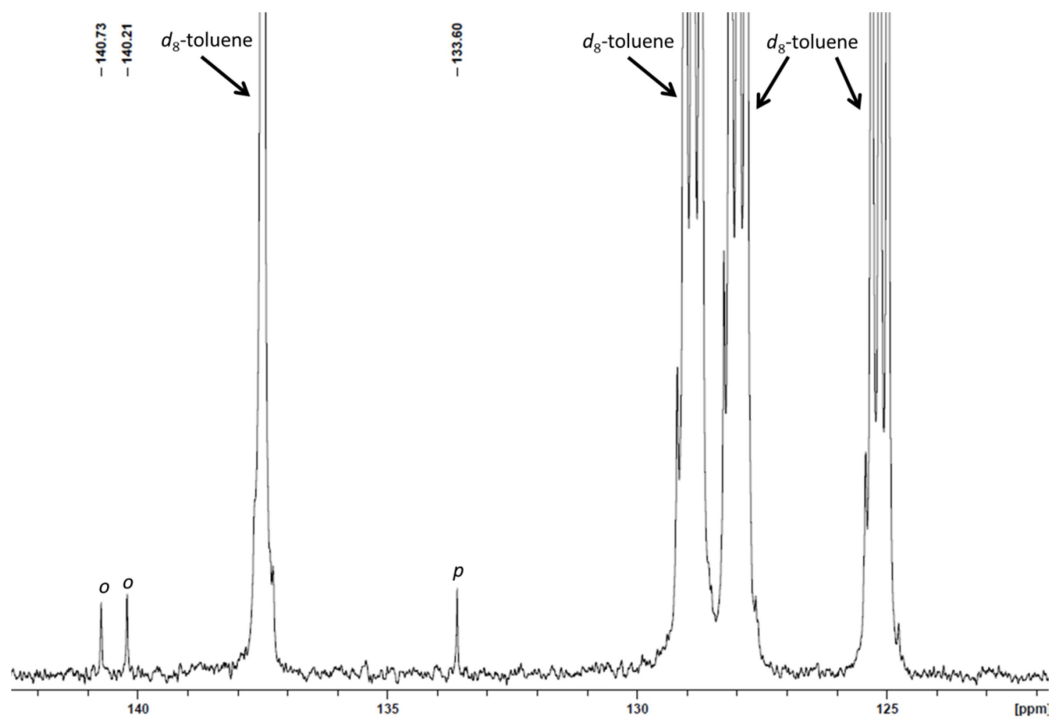

**Figure S33.** Expanded aromatic region of the  $^{13}\text{C}\{^1\text{H}\}$  NMR spectrum of  $[(\text{dmpe})_2\text{Mn}(\mu\text{-H})_2\text{BMes}_2]$  (**5**) in  $d_8$ -toluene (151 MHz, 298 K).

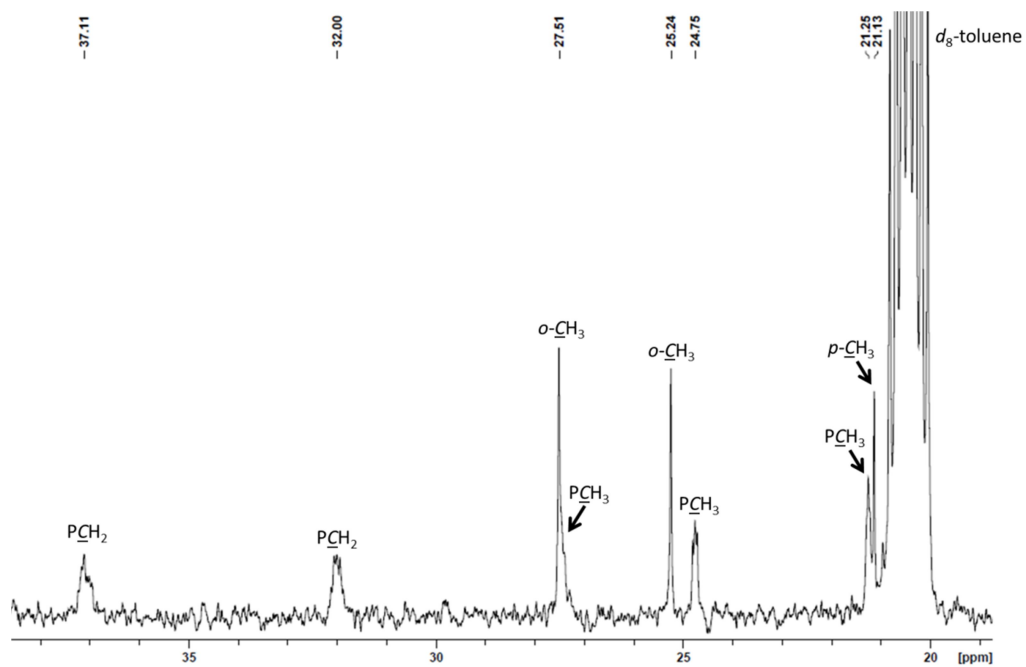

**Figure S34.** Expanded alkyl region of the  $^{13}\text{C}\{^1\text{H}\}$  NMR spectrum of  $[(\text{dmpe})_2\text{Mn}(\mu\text{-H})_2\text{BMes}_2]$  (**5**) in  $d_8$ -toluene (151 MHz, 298 K).



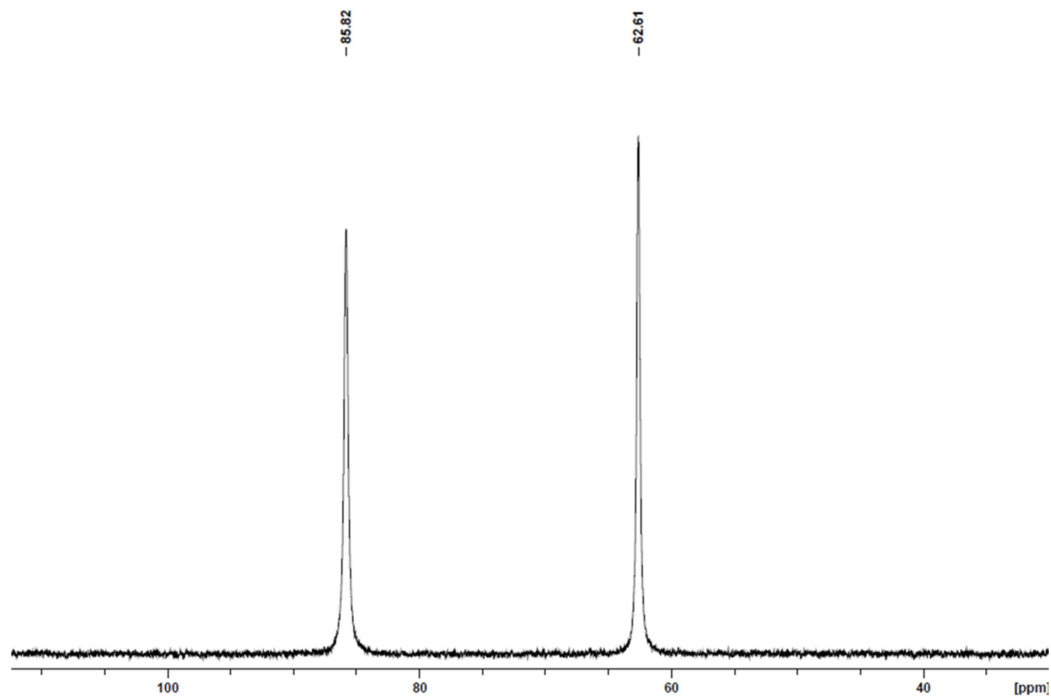

**Figure S35.**  $^{31}\text{P}\{^1\text{H}\}$  NMR spectrum of  $[(\text{dmpe})_2\text{Mn}(\mu\text{-H})_2\text{BMes}_2]$  (**5**) in  $d_8$ -toluene (243 MHz, 298 K).

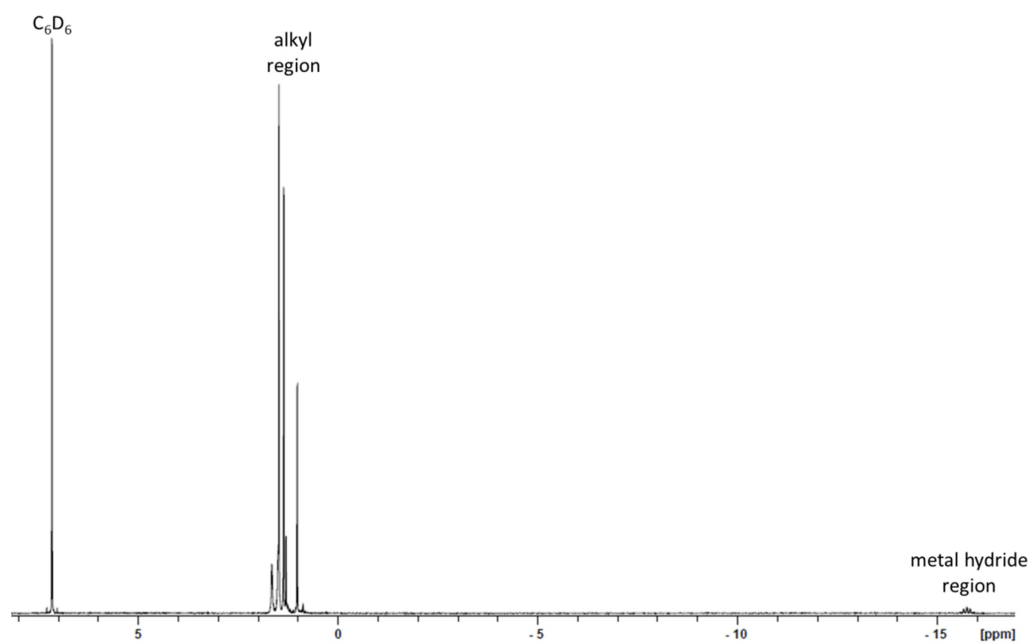

**Figure S36.**  $^1\text{H}$  NMR spectrum of  $\text{trans,trans-}[(\text{dmpe})_2\text{MnH}_2(\mu\text{-dmpe})]$  (**trans,trans-6**) in  $\text{C}_6\text{D}_6$  (600 MHz, 298 K).

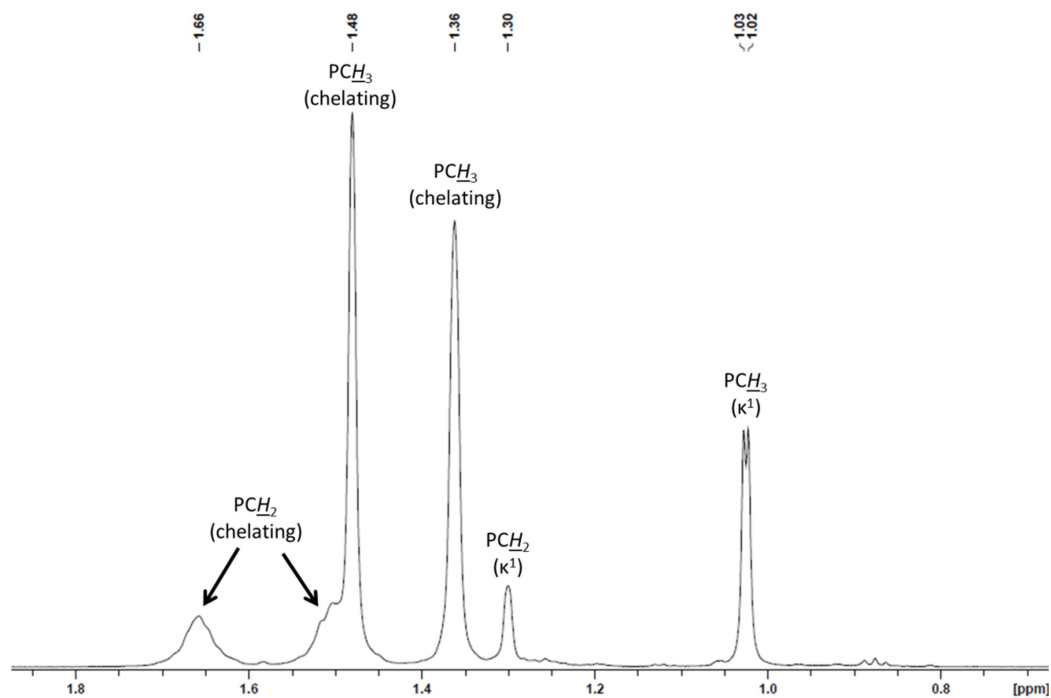

**Figure S37.** Expanded alkyl region of the  $^1\text{H}$  NMR spectrum of *trans,trans*-[ $\{(\text{dmpe})_2\text{MnH}\}_2(\mu\text{-dmpe})$ ] (*trans,trans*-6) in  $\text{C}_6\text{D}_6$  (600 MHz, 298 K).

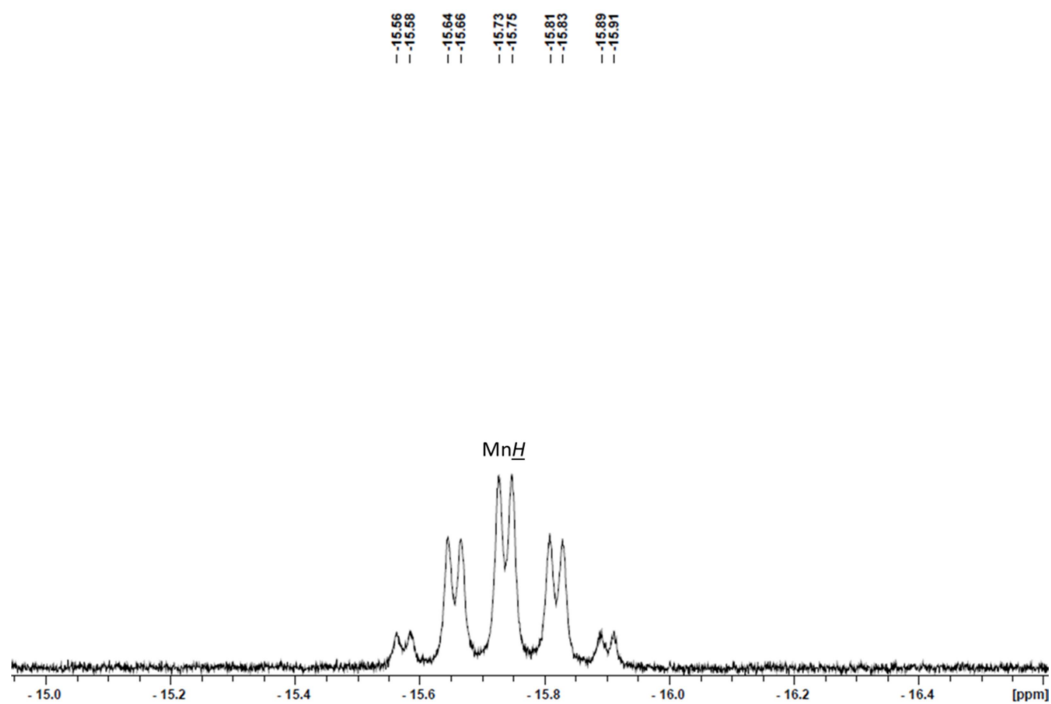

**Figure S38.** Expanded  $\text{MnH}$  region of the  $^1\text{H}$  NMR spectrum of *trans,trans*-[ $\{(\text{dmpe})_2\text{MnH}\}_2(\mu\text{-dmpe})$ ] (*trans,trans*-6) in  $\text{C}_6\text{D}_6$  (600 MHz, 298 K).

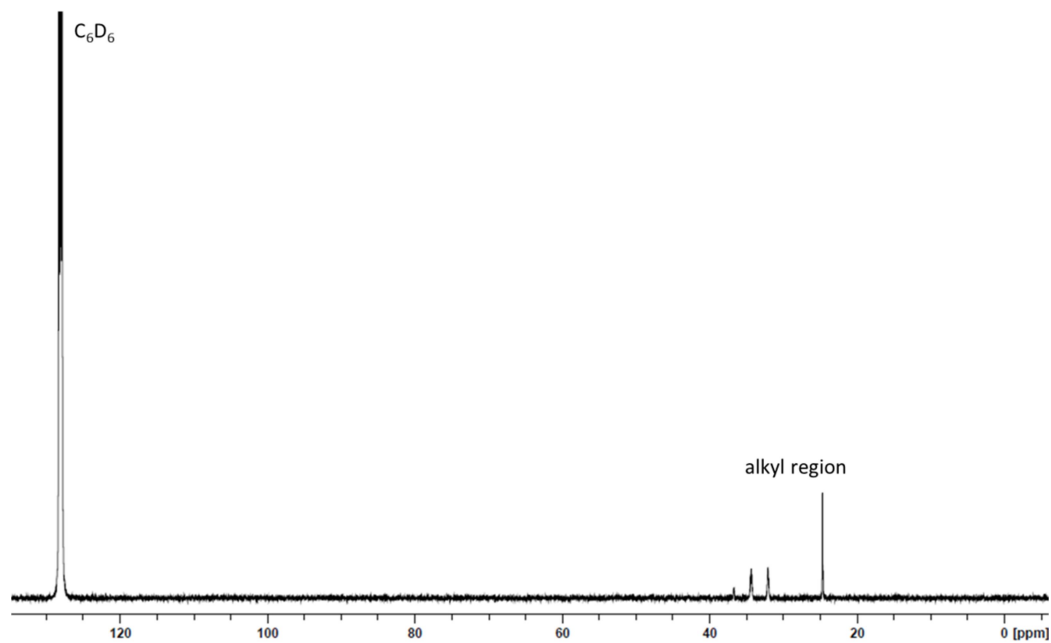

**Figure S39.**  $^{13}\text{C}\{^1\text{H}\}$  NMR spectrum of *trans,trans*-[ $\{(\text{dmpe})_2\text{MnH}\}_2(\mu\text{-dmpe})$ ] (*trans,trans*-**6**) in  $\text{C}_6\text{D}_6$  (126 MHz, 298 K).

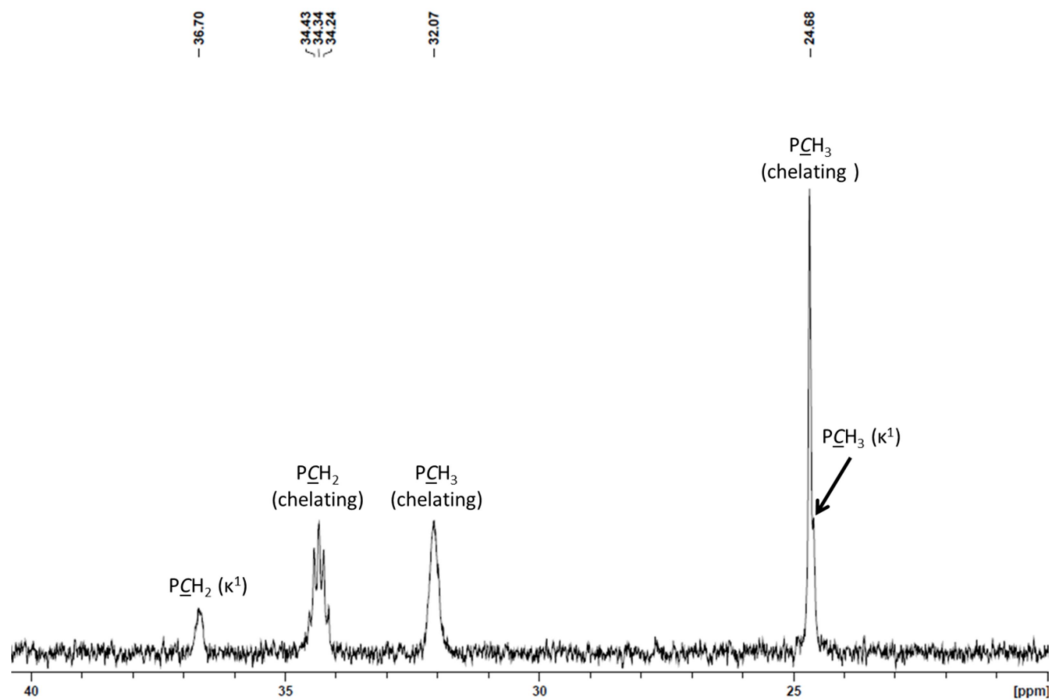

**Figure S40.** Expanded alkyl region of the  $^{13}\text{C}\{^1\text{H}\}$  NMR spectrum of *trans,trans*-[ $\{(\text{dmpe})_2\text{MnH}\}_2(\mu\text{-dmpe})$ ] (*trans,trans*-**6**) in  $\text{C}_6\text{D}_6$  (126 MHz, 298 K).

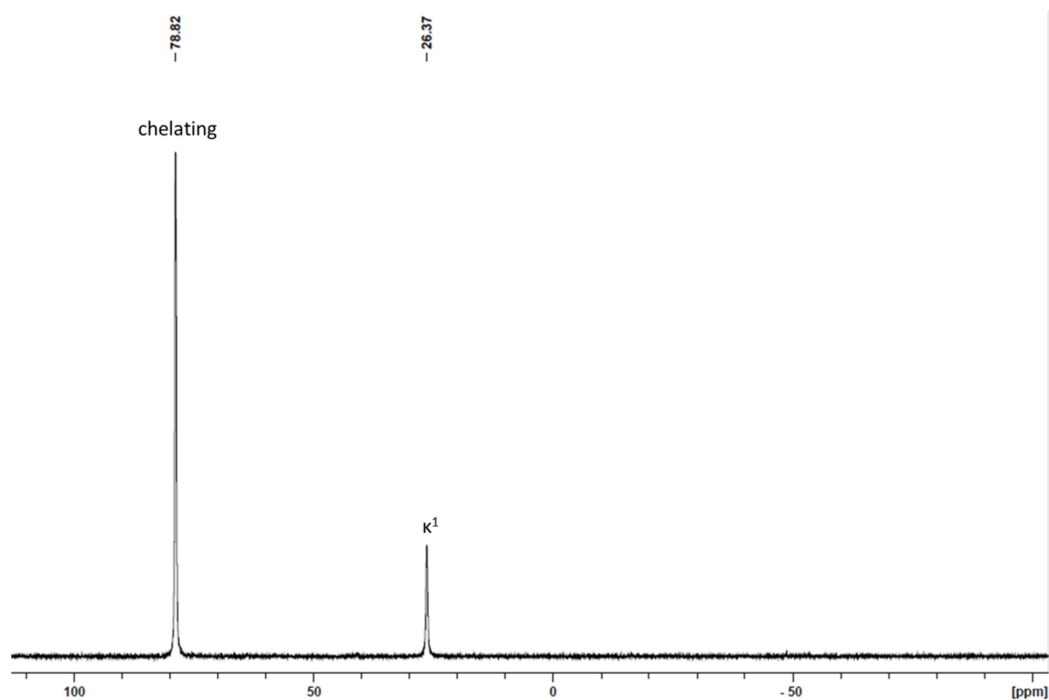

**Figure S41.**  $^{31}\text{P}\{^1\text{H}\}$  NMR spectrum of *trans,trans*- $[\{(\text{dmpe})_2\text{MnH}\}_2(\mu\text{-dmpe})]$  (*trans,trans*-**6**) in  $\text{C}_6\text{D}_6$  (243 MHz, 298 K).

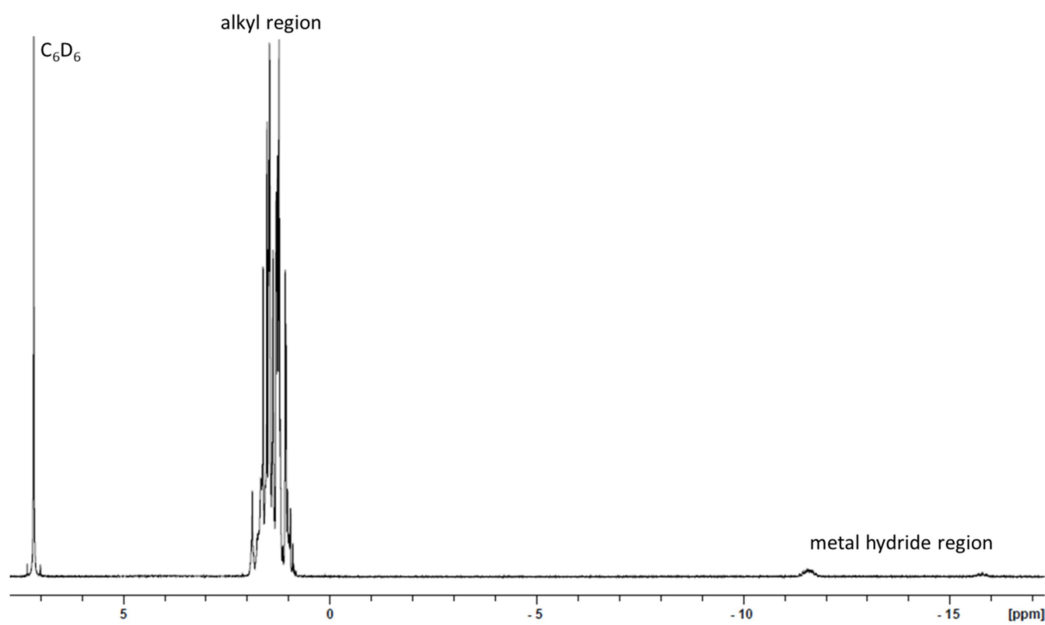

**Figure S42.**  $^1\text{H}$  NMR spectrum of a solution containing *cis*-containing  $[\{(\text{dmpe})_2\text{MnH}\}_2(\mu\text{-dmpe})]$  (*cis*-containing **6**) generated by exposing a solution of *trans,trans*- $[\{(\text{dmpe})_2\text{MnH}\}_2(\mu\text{-dmpe})]$  (*trans,trans*-**6**) in  $\text{C}_6\text{D}_6$  to light at room temperature for 25 hours (500 MHz, 298 K).

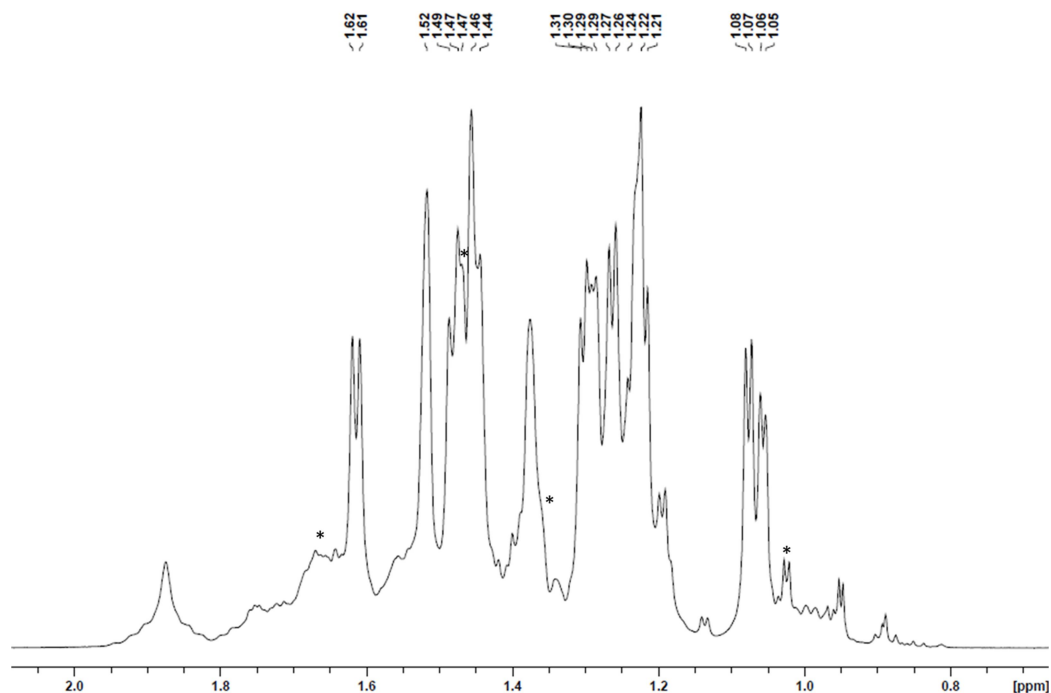

**Figure S43.** Expanded alkyl region of the  $^1\text{H}$  NMR spectrum of a solution containing *cis*-containing  $\{[(\text{dmpe})_2\text{MnH}]_2(\mu\text{-dmpe})\}$  (***cis*-containing 6**) generated by exposing a solution of *trans,trans*- $\{[(\text{dmpe})_2\text{MnH}]_2(\mu\text{-dmpe})\}$  (***trans,trans*-6**) in  $\text{C}_6\text{D}_6$  to light at room temperature for 25 hours (500 MHz, 298 K). \* indicates peaks from ***trans,trans*-6**.

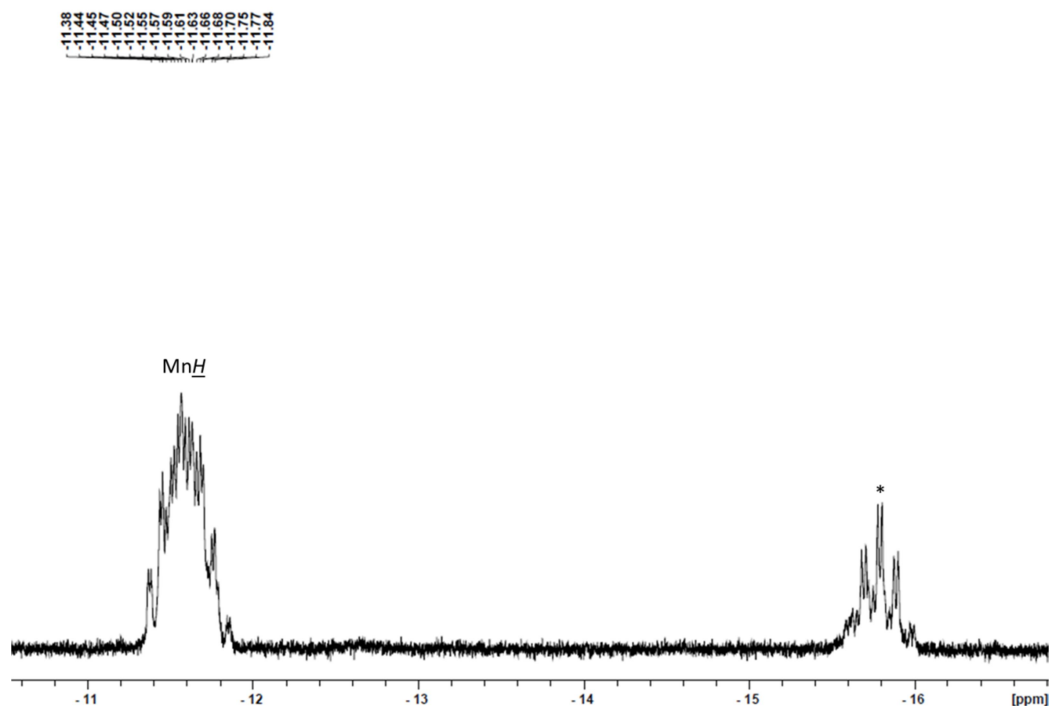

**Figure S44.** Expanded  $\text{MnH}$  region of the  $^1\text{H}$  NMR spectrum of a solution containing *cis*-containing  $\{[(\text{dmpe})_2\text{MnH}]_2(\mu\text{-dmpe})\}$  (***cis*-containing 6**) generated by exposing a solution of *trans,trans*- $\{[(\text{dmpe})_2\text{MnH}]_2(\mu\text{-dmpe})\}$  (***trans,trans*-6**) in  $\text{C}_6\text{D}_6$  to light at room temperature for 25 hours (500 MHz, 298 K).  $\text{MnH}$  indicates a peak from ***cis*-containing 6**, and \* indicates a peak from ***trans,trans*-6**.

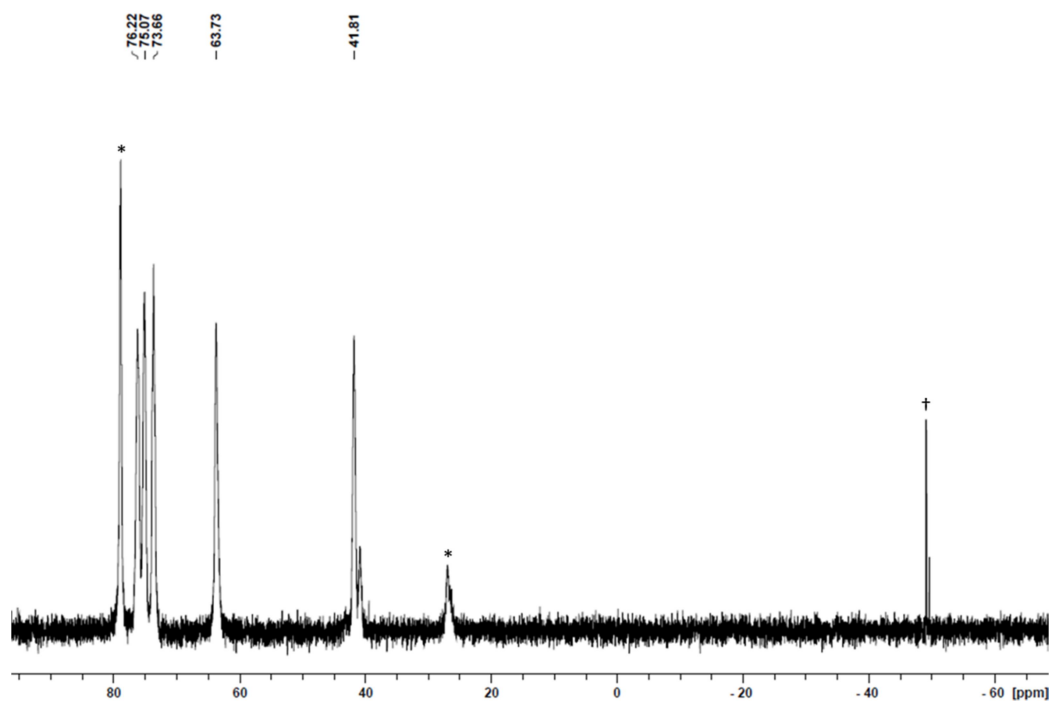

**Figure S45.**  $^{31}\text{P}\{^1\text{H}\}$  NMR spectrum of a solution containing *cis*-containing  $[\{(\text{dmpe})_2\text{MnH}\}_2(\mu\text{-dmpe})]$  (*cis*-containing **6**) generated by exposing a solution of *trans,trans*- $[\{(\text{dmpe})_2\text{MnH}\}_2(\mu\text{-dmpe})]$  (*trans,trans*-**6**) in  $\text{C}_6\text{D}_6$  to light at room temperature for 25 hours (202 MHz, 298 K). \* indicates peaks from *trans,trans*-**6**, and † indicates a peak from an impurity of *trans*-**7**.

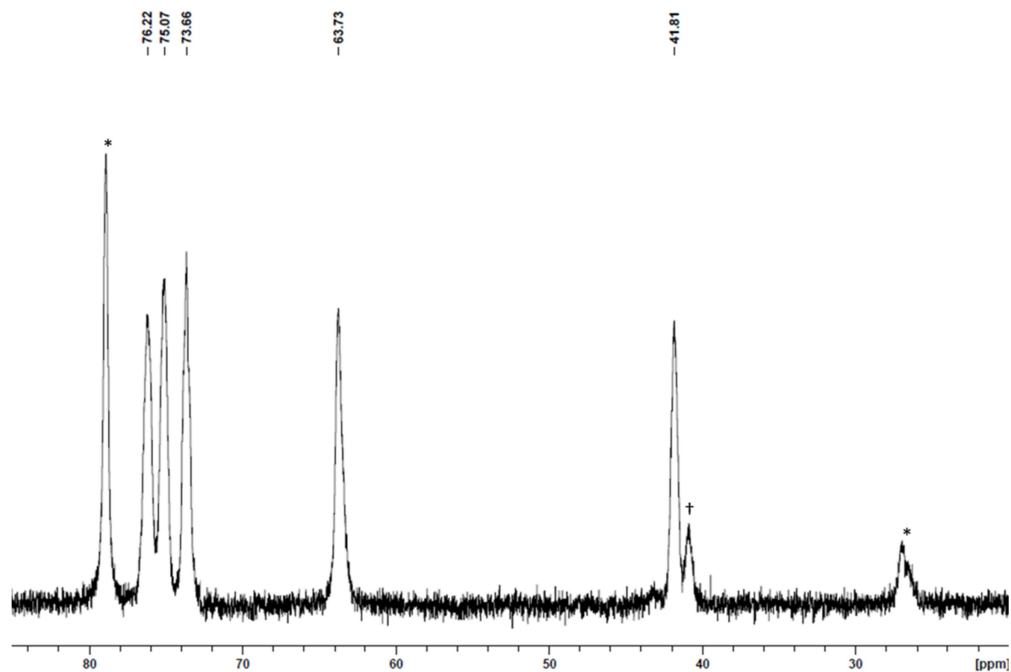

**Figure S46.** Zoomed in  $^{31}\text{P}\{^1\text{H}\}$  NMR spectrum of a solution *cis*-containing  $[\{(\text{dmpe})_2\text{MnH}\}_2(\mu\text{-dmpe})]$  (*cis*-containing **6**) generated by exposing a solution of *trans,trans*- $[\{(\text{dmpe})_2\text{MnH}\}_2(\mu\text{-dmpe})]$  (*trans,trans*-**6**) in  $\text{C}_6\text{D}_6$  to light at room temperature for 25 hours (202 MHz, 298 K). \* indicates peaks from *trans,trans*-**6**, and † indicates a peak from an unidentified impurity.

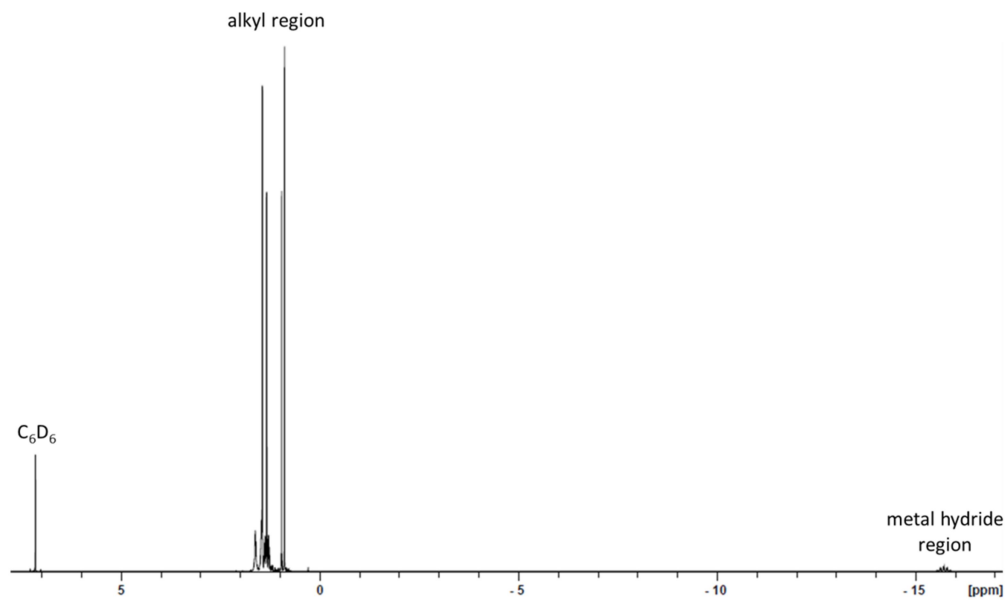

Figure S47.  $^1\text{H}$  NMR spectrum of *trans*-[(dmpe) $_2\text{MnH}(\kappa_1\text{-dmpe})$ ] (**trans-7**) in  $\text{C}_6\text{D}_6$  (600 MHz, 298 K).

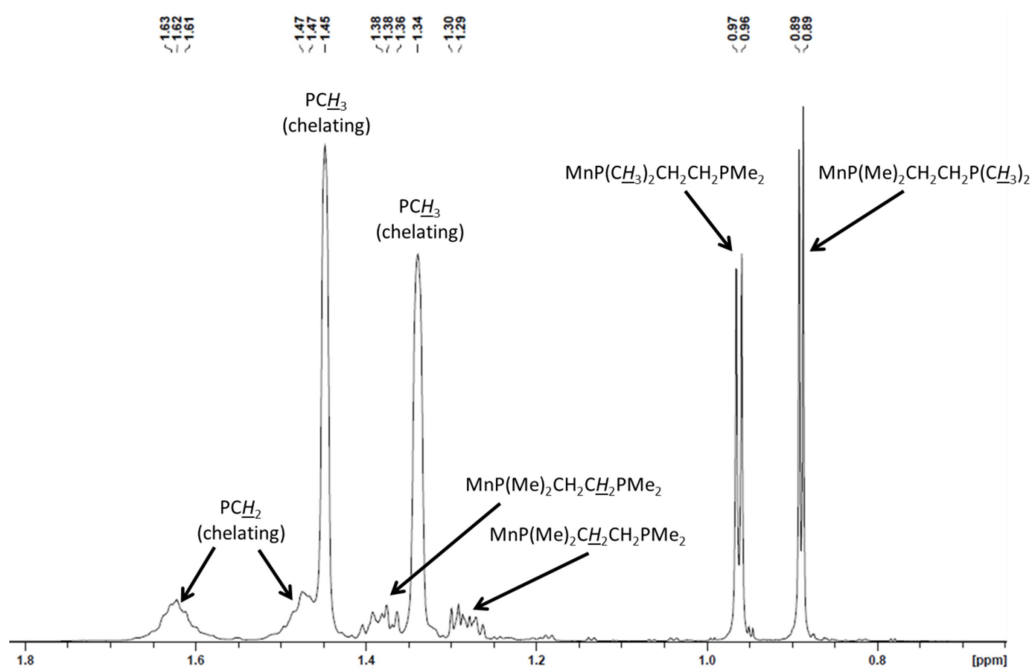

Figure S48. Expanded alkyl region of the  $^1\text{H}$  NMR spectrum of *trans*-[(dmpe) $_2\text{MnH}(\kappa_1\text{-dmpe})$ ] (**trans-7**) in  $\text{C}_6\text{D}_6$  (600 MHz, 298 K).

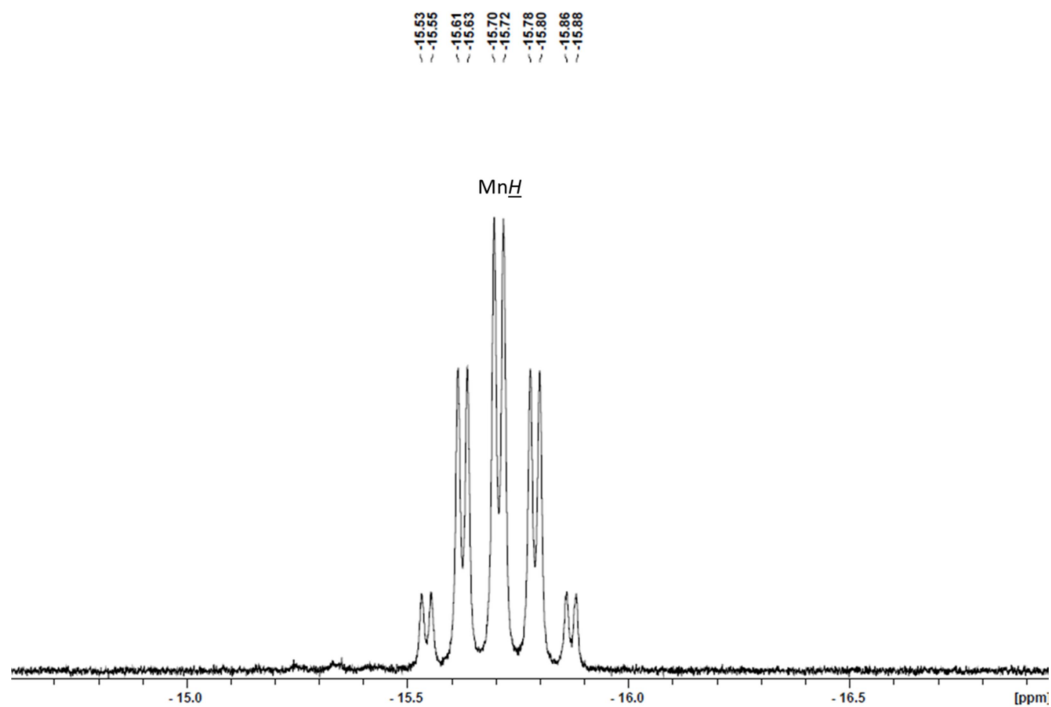

**Figure S49.** Expanded MnH region of the  $^1\text{H}$  NMR spectrum of *trans*-[(dmpe) $_2$ MnH( $\kappa_1$ -dmpe)] (*trans*-7) in  $\text{C}_6\text{D}_6$  (600 MHz, 298 K).

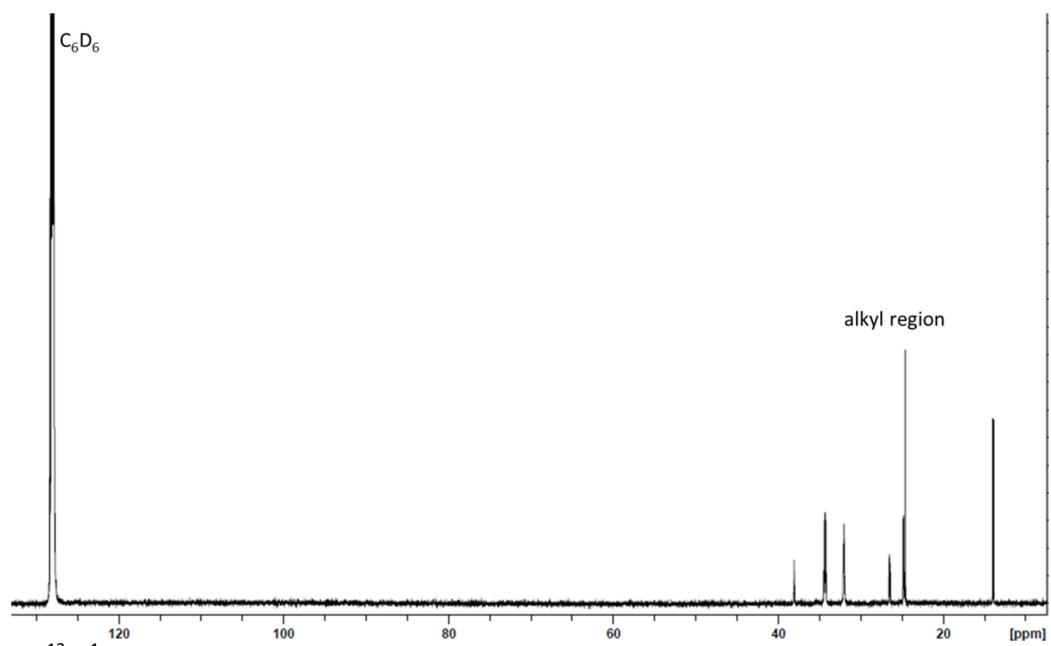

**Figure S50.**  $^{13}\text{C}\{^1\text{H}\}$  NMR spectrum of *trans*-[(dmpe) $_2$ MnH( $\kappa_1$ -dmpe)] (*trans*-7) in  $\text{C}_6\text{D}_6$  (151 MHz, 298 K).



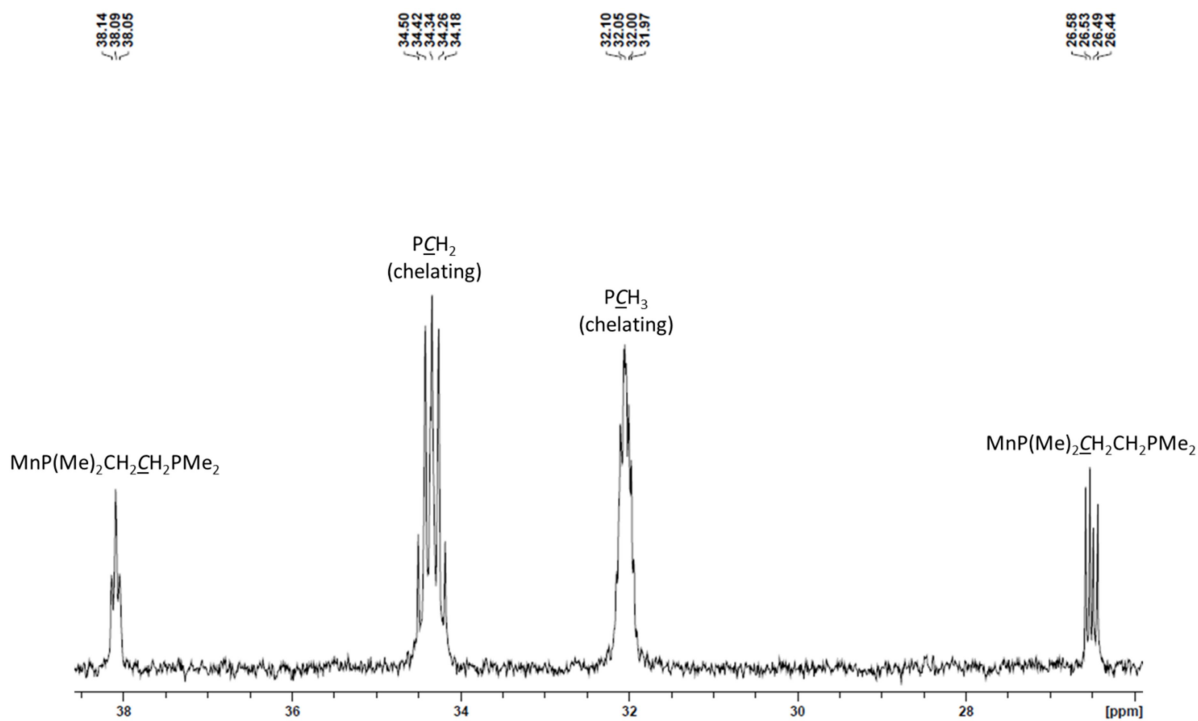

**Figure S51.** Expanded high frequency portion of the alkyl region of the  $^{13}\text{C}\{^1\text{H}\}$  NMR spectrum of *trans*- $[(\text{dmpe})_2\text{MnH}(\kappa_1\text{-dmpe})]$  (***trans-7***) in  $\text{C}_6\text{D}_6$  (151 MHz, 298 K).

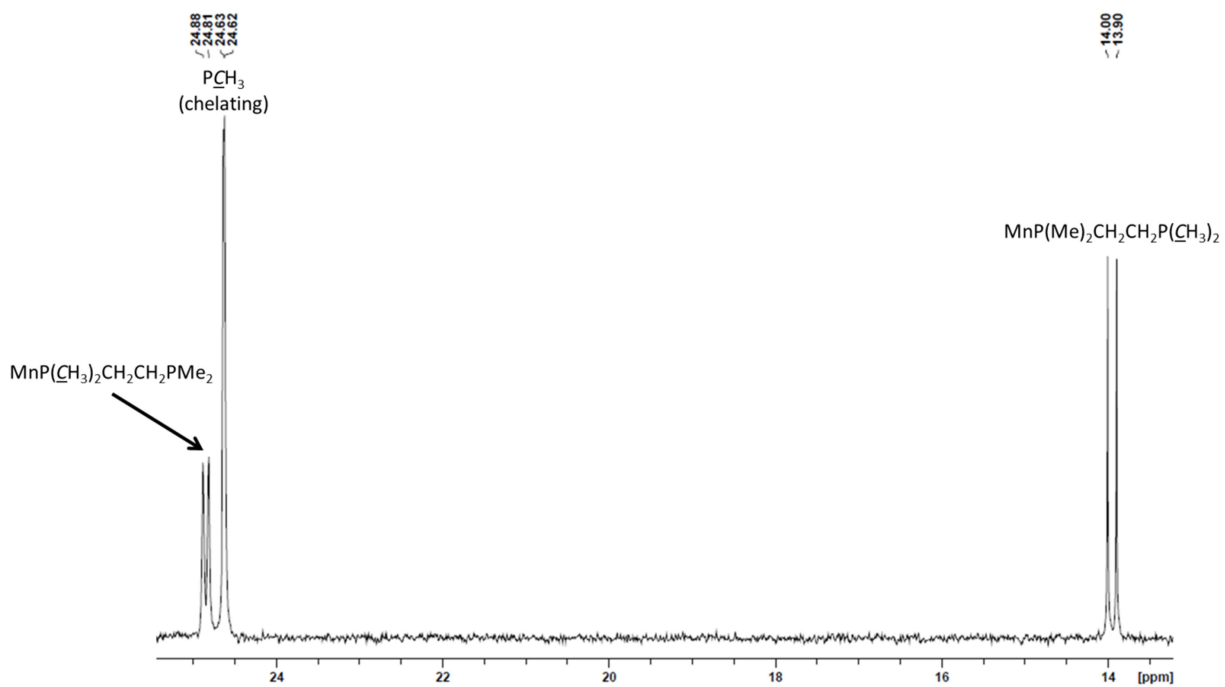

**Figure S52.** Expanded low frequency portion of the alkyl region of the  $^{13}\text{C}\{^1\text{H}\}$  NMR spectrum of *trans*- $[(\text{dmpe})_2\text{MnH}(\kappa_1\text{-dmpe})]$  (***trans-7***) in  $\text{C}_6\text{D}_6$  (151 MHz, 298 K).

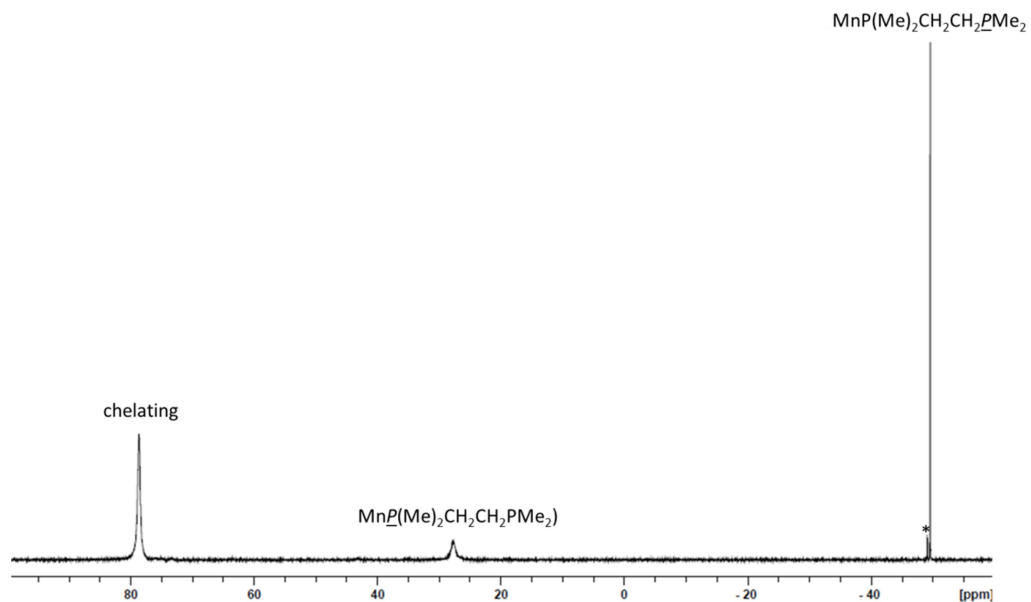

Figure S53.  $^{31}\text{P}\{^1\text{H}\}$  NMR spectrum of *trans*- $[(\text{dmpe})_2\text{MnH}(\kappa_1\text{-dmpe})]$  (*trans*-7) in  $\text{C}_6\text{D}_6$  (243 MHz, 298 K).

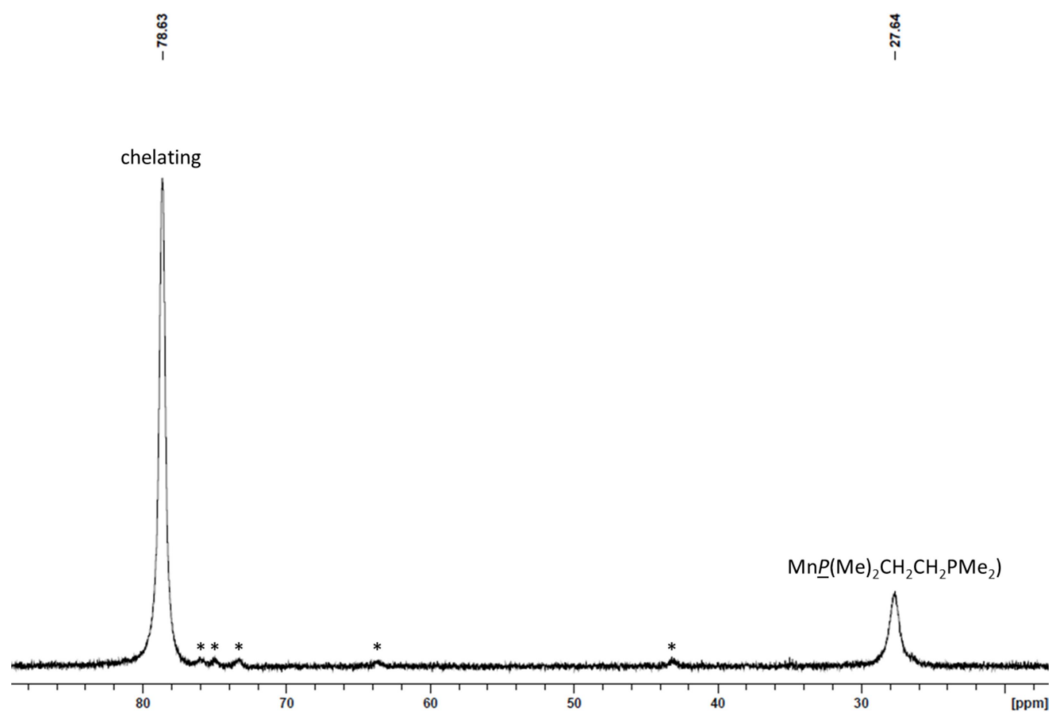

Figure S54. Expanded  $\text{MnP}$  region of the  $^{31}\text{P}\{^1\text{H}\}$  NMR spectrum of *trans*- $[(\text{dmpe})_2\text{MnH}(\kappa_1\text{-dmpe})]$  (*trans*-7) in  $\text{C}_6\text{D}_6$  (243 MHz, 298 K). \* indicates peaks from an impurity of *cis*- $[(\text{dmpe})_2\text{MnH}(\kappa_1\text{-dmpe})]$  (*cis*-7).

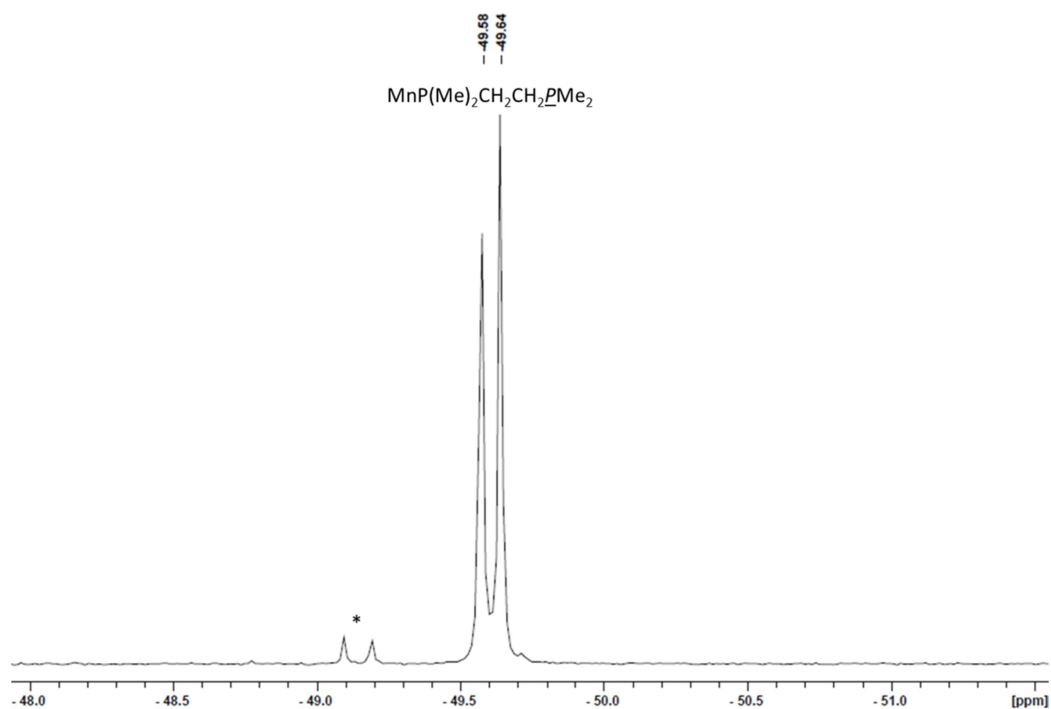

**Figure S55.** Expanded free phosphine region of the  $^{31}\text{P}\{^1\text{H}\}$  NMR spectrum of *trans*- $[(\text{dmpe})_2\text{MnH}(\kappa_1\text{-dmpe})]$  (***trans-7***) in  $\text{C}_6\text{D}_6$  (243 MHz, 298 K). \* indicates a peak from an impurity of *cis*- $[(\text{dmpe})_2\text{MnH}(\kappa_1\text{-dmpe})]$  (***cis-7***).

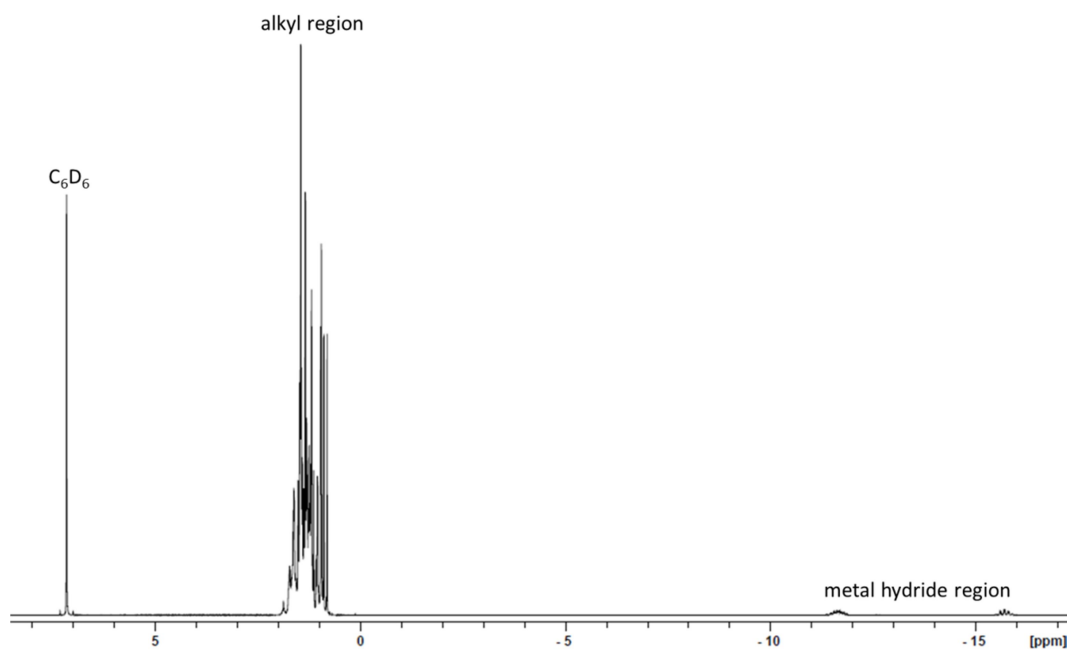

**Figure S56.**  $^1\text{H}$  NMR spectrum of a solution containing *cis*- $[(\text{dmpe})_2\text{MnH}(\kappa_1\text{-dmpe})]$  (***cis-7***) generated by exposing a solution of *trans*- $[(\text{dmpe})_2\text{MnH}(\kappa_1\text{-dmpe})]$  (***trans-7***) in  $\text{C}_6\text{D}_6$  to light at room temperature for 25 hours (500 MHz, 298 K).

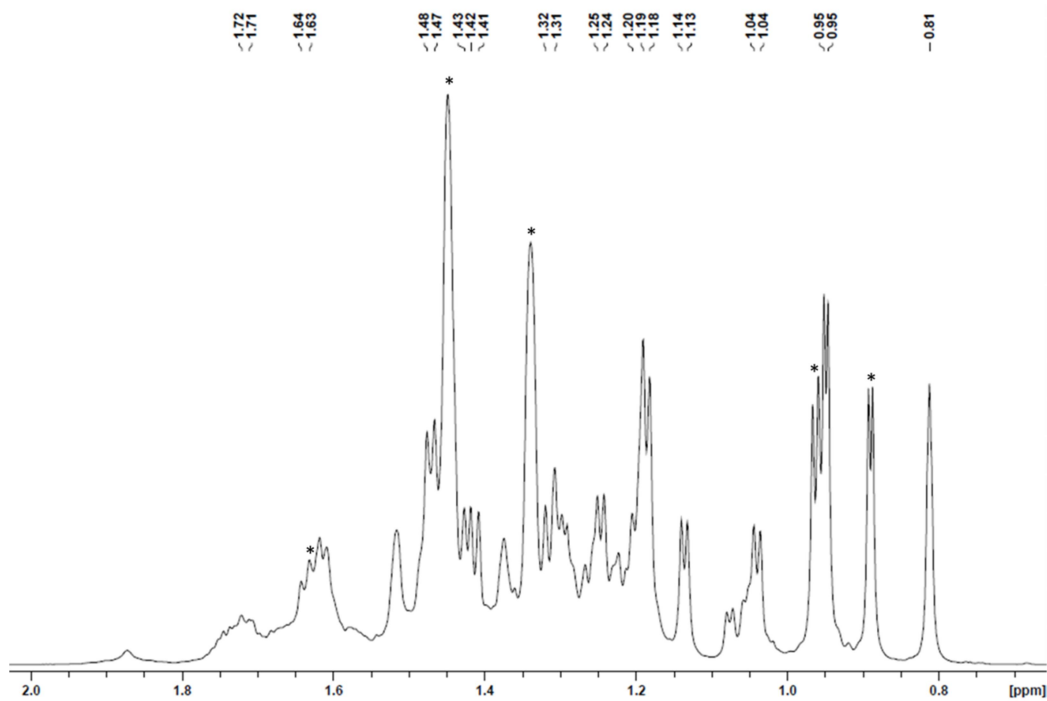

**Figure S57.** Expanded alkyl region of the  $^1\text{H}$  NMR spectrum of a solution containing *cis*- $[(\text{dmpe})_2\text{MnH}(\kappa_1\text{-dmpe})]$  (*cis*-**7**) generated by exposing a solution of *trans*- $[(\text{dmpe})_2\text{MnH}(\kappa_1\text{-dmpe})]$  (*trans*-**7**) in  $\text{C}_6\text{D}_6$  to light at room temperature for 25 hours (500 MHz, 298 K). \* indicates peaks from *trans*-**7**.

11.44  
11.47  
11.49  
11.54  
11.56  
11.61  
11.63  
11.65  
11.68  
11.72  
11.74  
11.77  
11.81  
11.86  
11.88

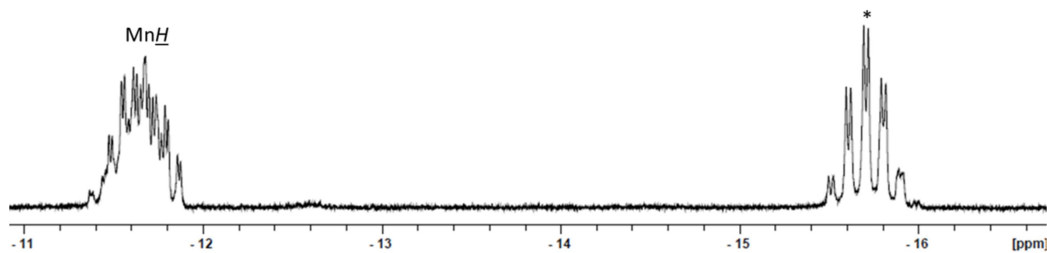

**Figure S58.** Expanded  $\text{MnH}$  region of the  $^1\text{H}$  NMR spectrum of a solution containing *cis*- $[(\text{dmpe})_2\text{MnH}(\kappa_1\text{-dmpe})]$  (*cis*-**7**) generated by exposing a solution of *trans*- $[(\text{dmpe})_2\text{MnH}(\kappa_1\text{-dmpe})]$  (*trans*-**7**) in  $\text{C}_6\text{D}_6$  to light at room temperature for 25 hours (500 MHz, 298 K). \* indicates a peak from *trans*-**7**.

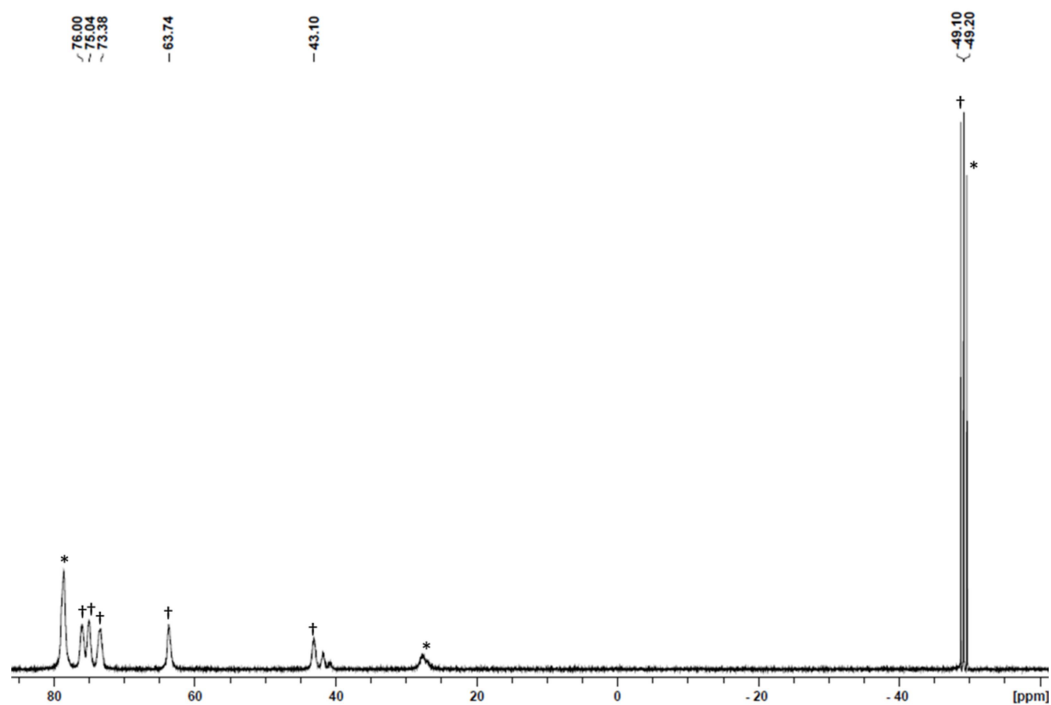

**Figure S59.**  $^{31}\text{P}\{^1\text{H}\}$  NMR spectrum of a solution containing *cis*-[(dmpe) $_2$ MnH( $\kappa_1$ -dmpe)] (***cis*-7**) generated by exposing a solution of *trans*-[(dmpe) $_2$ MnH( $\kappa_1$ -dmpe)] (***trans*-7**) in  $\text{C}_6\text{D}_6$  to light at room temperature for 25 hours (202 MHz, 298 K). † indicates peaks from ***cis*-7**, and \* indicates peaks from ***trans*-7**.

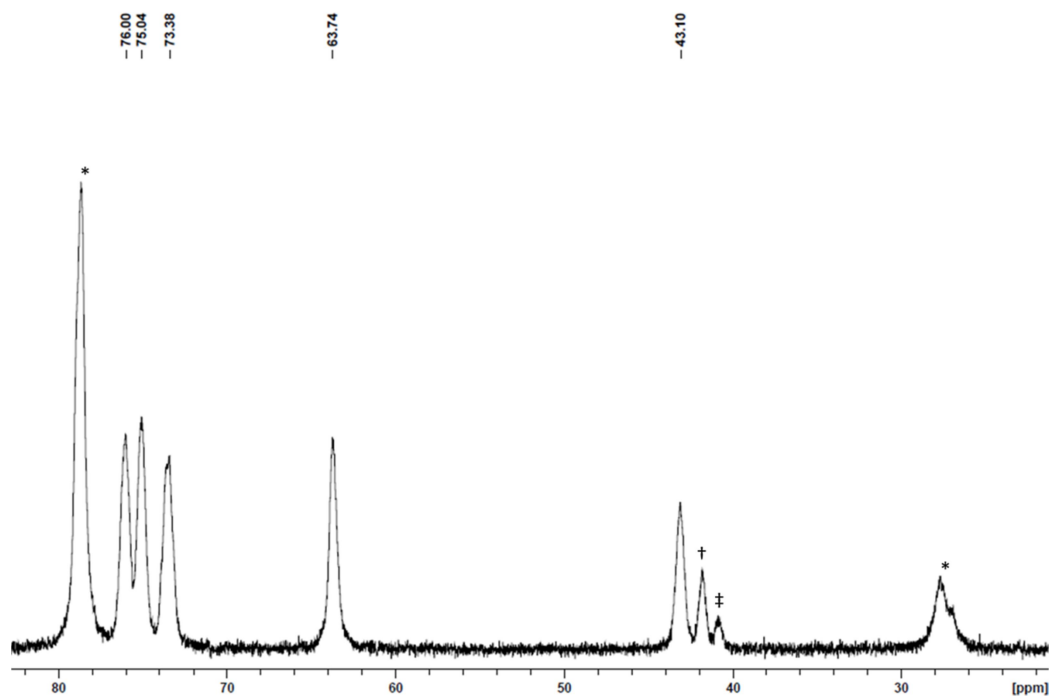

**Figure S60.** Expanded  $\text{MnP}$  region of the  $^{31}\text{P}\{^1\text{H}\}$  NMR spectrum of a solution containing *cis*-[(dmpe) $_2$ MnH( $\kappa_1$ -dmpe)] (***cis*-7**) generated by exposing a solution of *trans*-[(dmpe) $_2$ MnH( $\kappa_1$ -dmpe)] (***trans*-7**) in  $\text{C}_6\text{D}_6$  to light at room temperature for 25 hours (202 MHz, 298 K). \* indicates peaks from ***trans*-7**, † indicates a peak from ***cis*-containing 6**, and ‡ indicates a peak from an unidentified impurity.

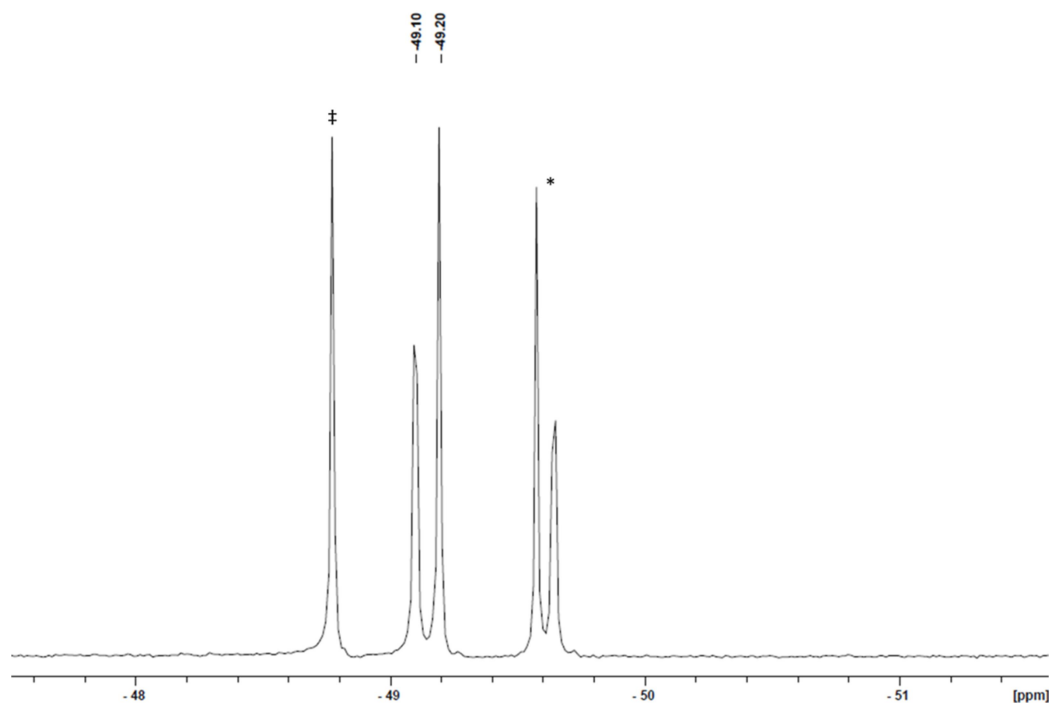

**Figure S61.** Expanded free phosphine region of the  $^{31}\text{P}\{^1\text{H}\}$  NMR spectrum of a solution containing *cis*- $[(\text{dmpe})_2\text{MnH}(\kappa_1\text{-dmpe})]$  (***cis-7***) generated by exposing a solution of *trans*- $[(\text{dmpe})_2\text{MnH}(\kappa_1\text{-dmpe})]$  (***trans-7***) in  $\text{C}_6\text{D}_6$  to light at room temperature for 25 hours (202 MHz, 298 K). \* indicates a peak from ***trans-7*** and ‡ indicates a peak from an unidentified impurity.

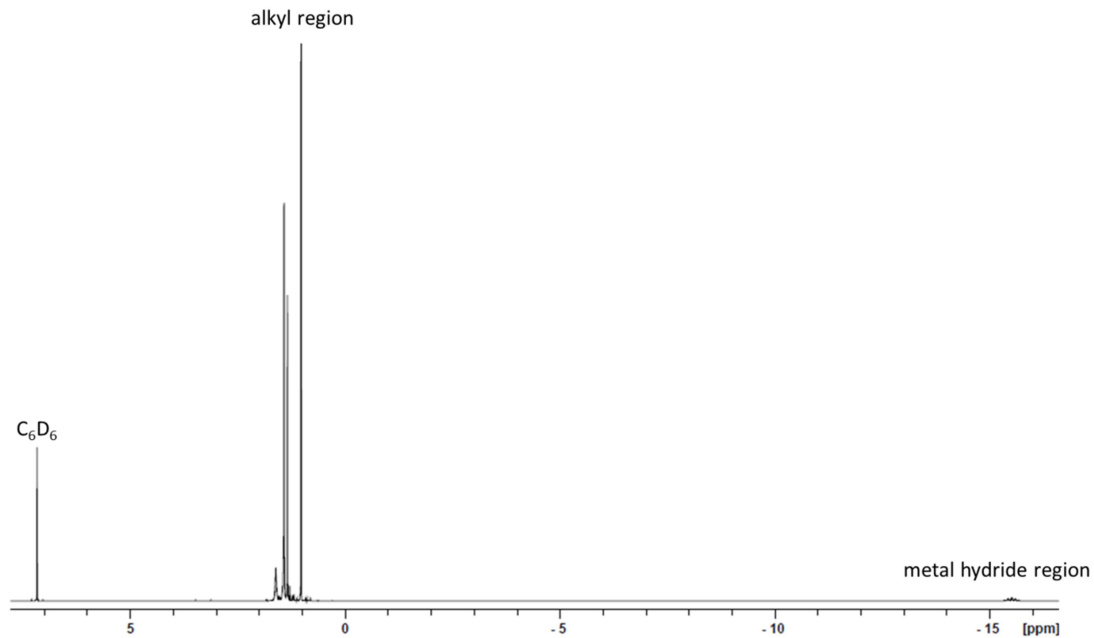

**Figure S62.**  $^1\text{H}$  NMR spectrum of *trans*- $[(\text{dmpe})_2\text{MnH}(\text{PMe}_3)]$  (***trans-8***) in  $\text{C}_6\text{D}_6$  (600 MHz, 298 K).

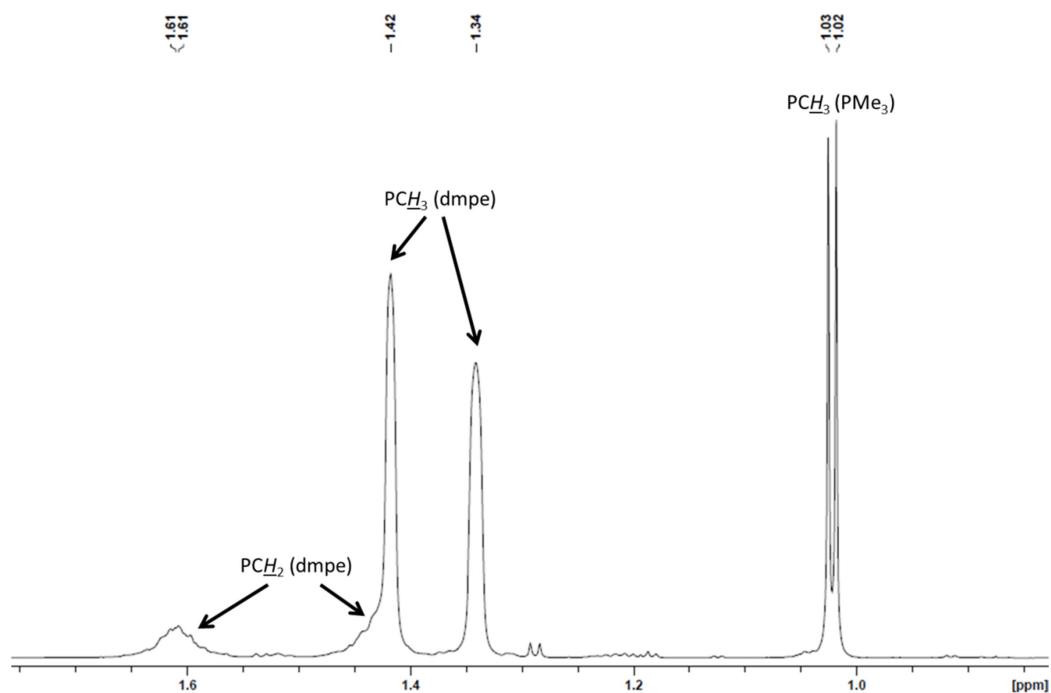

**Figure S63.** Expanded alkyl region of the  $^1\text{H}$  NMR spectrum of *trans*-[(dmpe) $_2$ MnH(PMe $_3$ )] (***trans*-8**) in C $_6$ D $_6$  (600 MHz, 298 K).

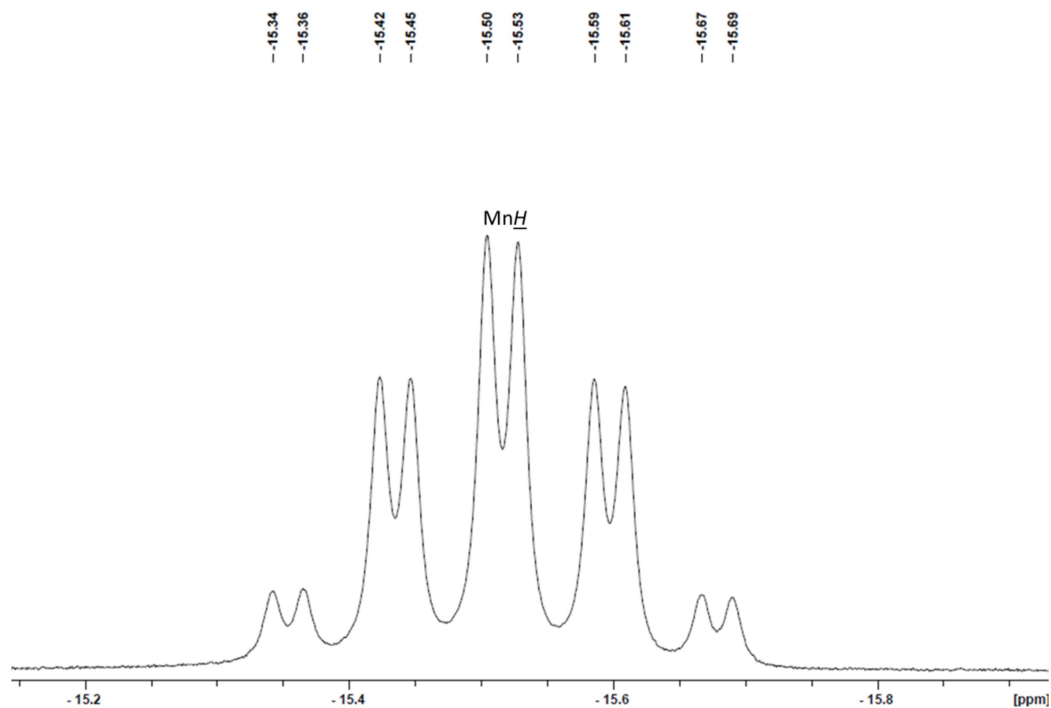

**Figure S64.** Expanded MnH region of the  $^1\text{H}$  NMR spectrum of *trans*-[(dmpe) $_2$ MnH(PMe $_3$ )] (***trans*-8**) in C $_6$ D $_6$  (600 MHz, 298 K).

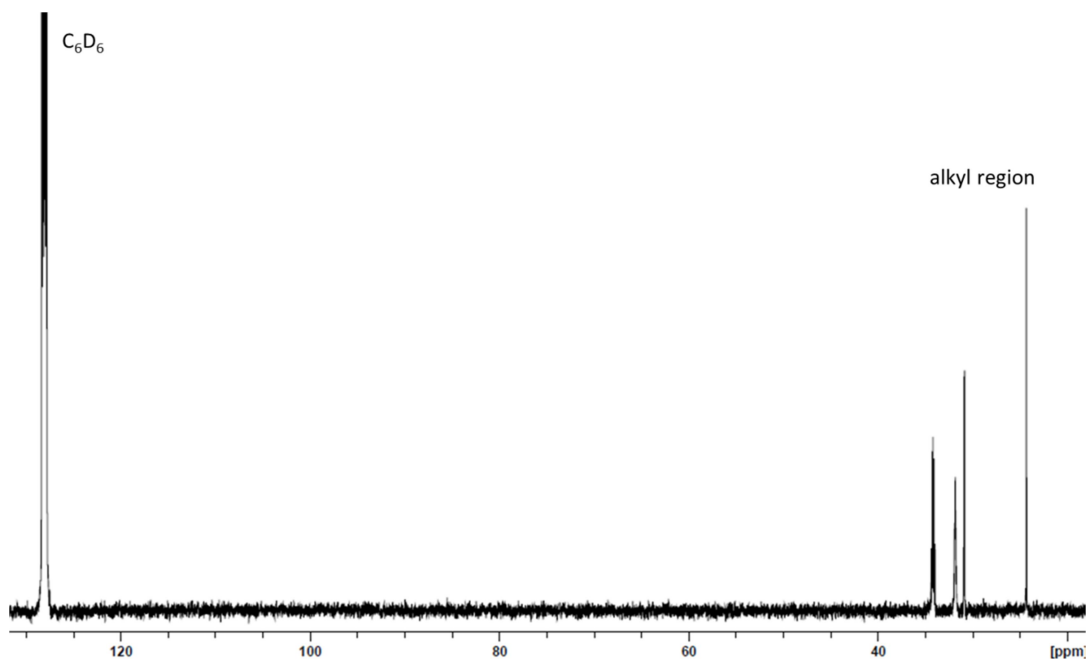

Figure S65.  $^{13}\text{C}\{^1\text{H}\}$  NMR spectrum of *trans*-[(dmpe) $_2$ MnH(PMe $_3$ )] (***trans*-8**) in C $_6$ D $_6$  (126 MHz, 298 K).

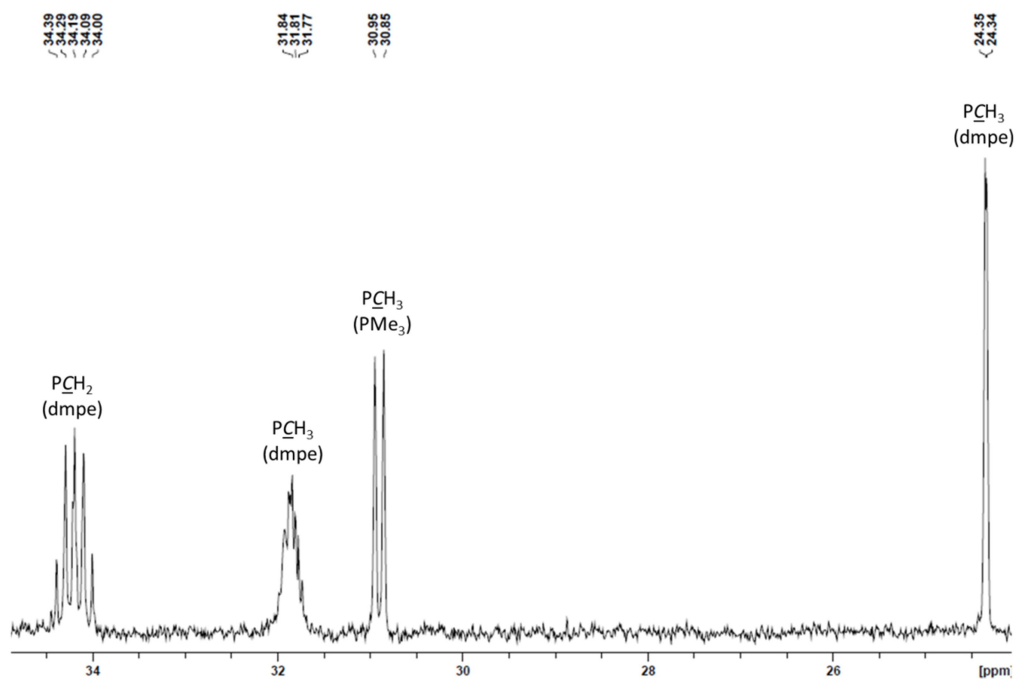

Figure S66. Expanded alkyl region of the  $^{13}\text{C}\{^1\text{H}\}$  NMR spectrum of *trans*-[(dmpe) $_2$ MnH(PMe $_3$ )] (***trans*-8**) in C $_6$ D $_6$  (126 MHz, 298 K).



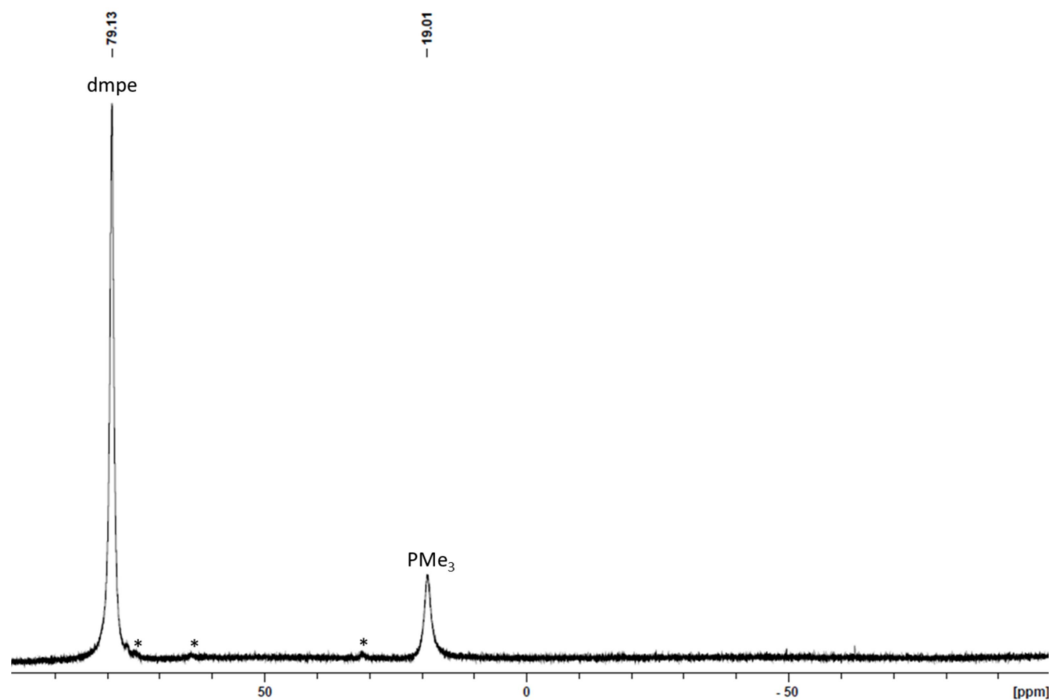

**Figure S67.**  $^{31}\text{P}\{^1\text{H}\}$  NMR spectrum of *trans*-[(dmpe) $_2$ MnH(PMe $_3$ )] (***trans-8***) in C $_6$ D $_6$  (243 MHz, 298 K). \* indicates peaks from an impurity of *cis*-[(dmpe) $_2$ MnH(PMe $_3$ )] (***cis-8***).

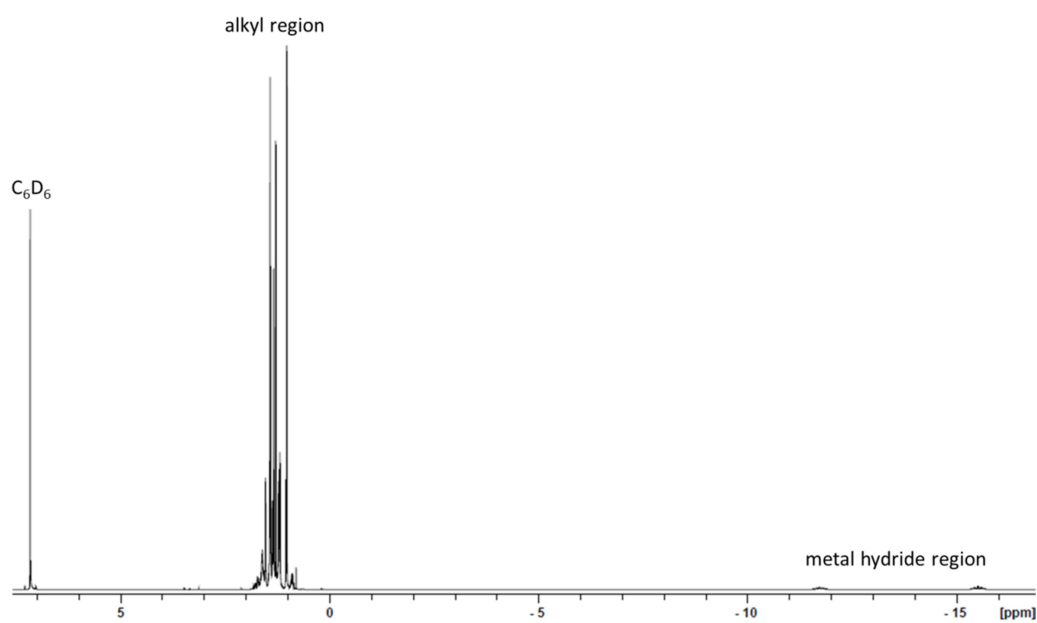

**Figure S68.**  $^1\text{H}$  NMR spectrum of a solution containing *cis*-[(dmpe) $_2$ MnH(PMe $_3$ )] (***cis-8***) generated from leaving a solution of *trans*-[(dmpe) $_2$ MnH(PMe $_3$ )] (***trans-8***) in C $_6$ D $_6$  at room temperature (mix of light and dark) for 11 days (600 MHz, 298 K).

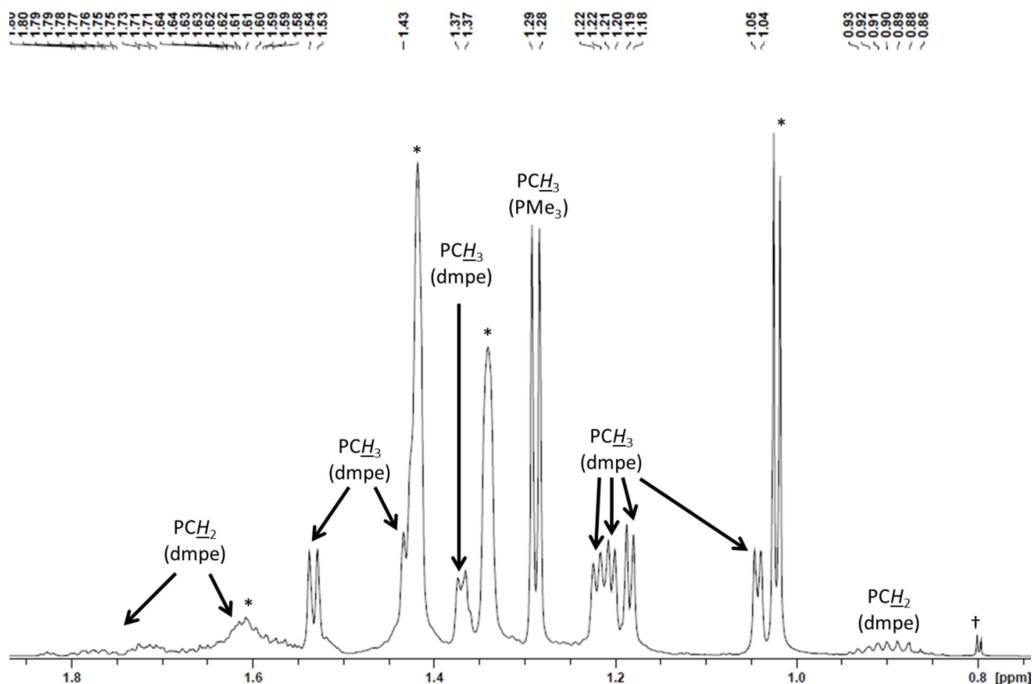

**Figure S69.** Expanded alkyl region of the  $^1\text{H}$  NMR spectrum of a solution containing *cis*- $[(\text{dmpe})_2\text{MnH}(\text{PMe}_3)]$  (***cis-8***) generated from leaving a solution of *trans*- $[(\text{dmpe})_2\text{MnH}(\text{PMe}_3)]$  (***trans-8***) in  $\text{C}_6\text{D}_6$  at room temperature (mix of light and dark) for 11 days (600 MHz, 298 K). \* indicates peaks from ***trans-8*** and  $\dagger$  indicates a peak from  $\text{PMe}_3$ .

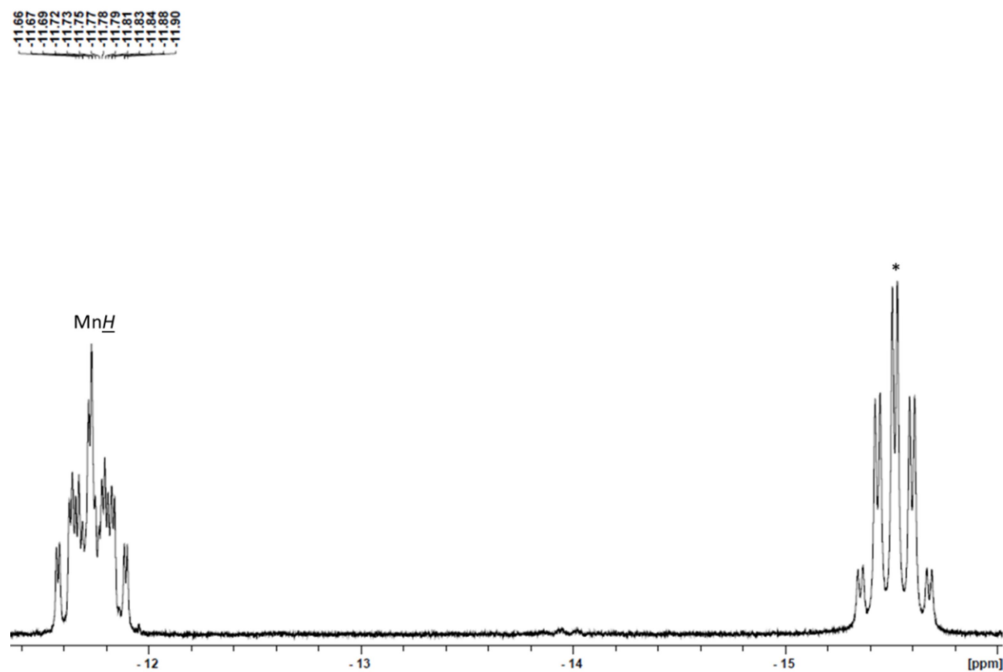

**Figure S70.** Expanded  $\text{MnH}$  region of the  $^1\text{H}$  NMR spectrum of a solution containing *cis*- $[(\text{dmpe})_2\text{MnH}(\text{PMe}_3)]$  (***cis-8***) generated from leaving a solution of *trans*- $[(\text{dmpe})_2\text{MnH}(\text{PMe}_3)]$  (***trans-8***) in  $\text{C}_6\text{D}_6$  at room temperature (mix of light and dark) for 11 days (600 MHz, 298 K). \* indicates a peak from ***trans-8***.

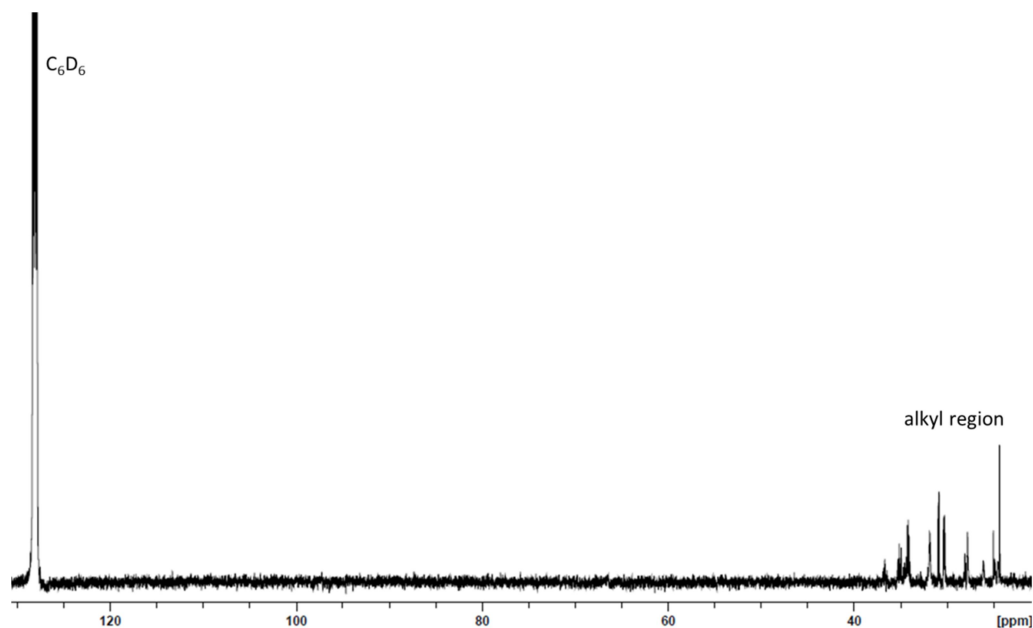

**Figure S71.**  $^{13}\text{C}\{^1\text{H}\}$  NMR spectrum of a solution containing *cis*- $[(\text{dmpe})_2\text{MnH}(\text{PMe}_3)]$  (***cis*-8**) generated from leaving a solution of *trans*- $[(\text{dmpe})_2\text{MnH}(\text{PMe}_3)]$  (***trans*-8**) in  $\text{C}_6\text{D}_6$  at room temperature (mix of light and dark) for 10 days (126 MHz, 298 K).

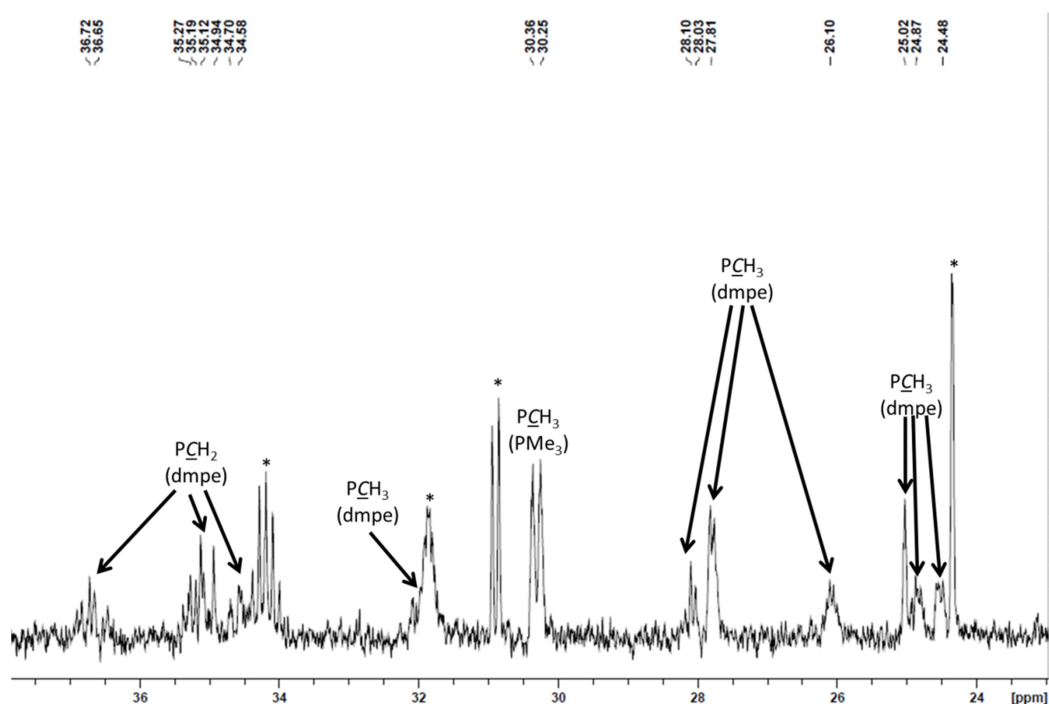

**Figure S72.** Expanded alkyl region of the  $^{13}\text{C}\{^1\text{H}\}$  NMR spectrum of a solution containing *cis*- $[(\text{dmpe})_2\text{MnH}(\text{PMe}_3)]$  (***cis*-8**) generated from leaving a solution of *trans*- $[(\text{dmpe})_2\text{MnH}(\text{PMe}_3)]$  (***trans*-8**) in  $\text{C}_6\text{D}_6$  at room temperature (mix of light and dark) for 10 days (126 MHz, 298 K). \* indicates peaks from ***trans*-8**.

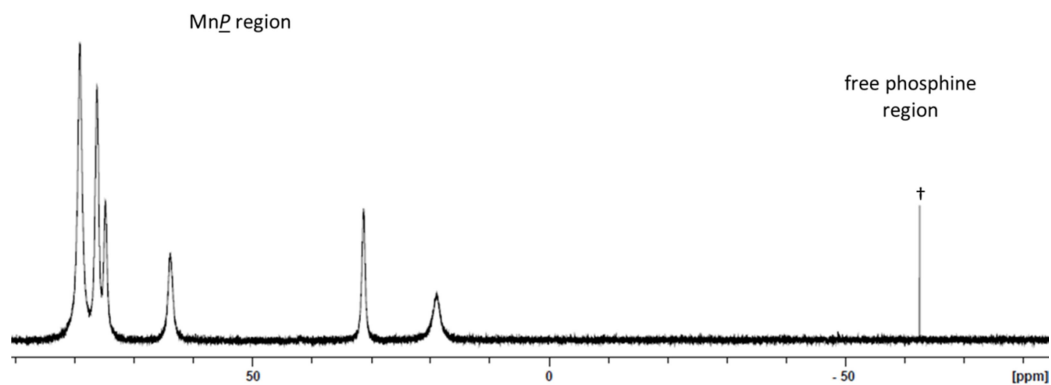

**Figure S73.**  $^{31}\text{P}\{^1\text{H}\}$  NMR spectrum of a solution containing *cis*- $[(\text{dmpe})_2\text{MnH}(\text{PMe}_3)]$  (***cis*-8**) generated from leaving a solution of *trans*- $[(\text{dmpe})_2\text{MnH}(\text{PMe}_3)]$  (***trans*-8**) in  $\text{C}_6\text{D}_6$  at room temperature (mix of light and dark) for 11 days (243 MHz, 298 K). † indicates a peaks from  $\text{PMe}_3$ .

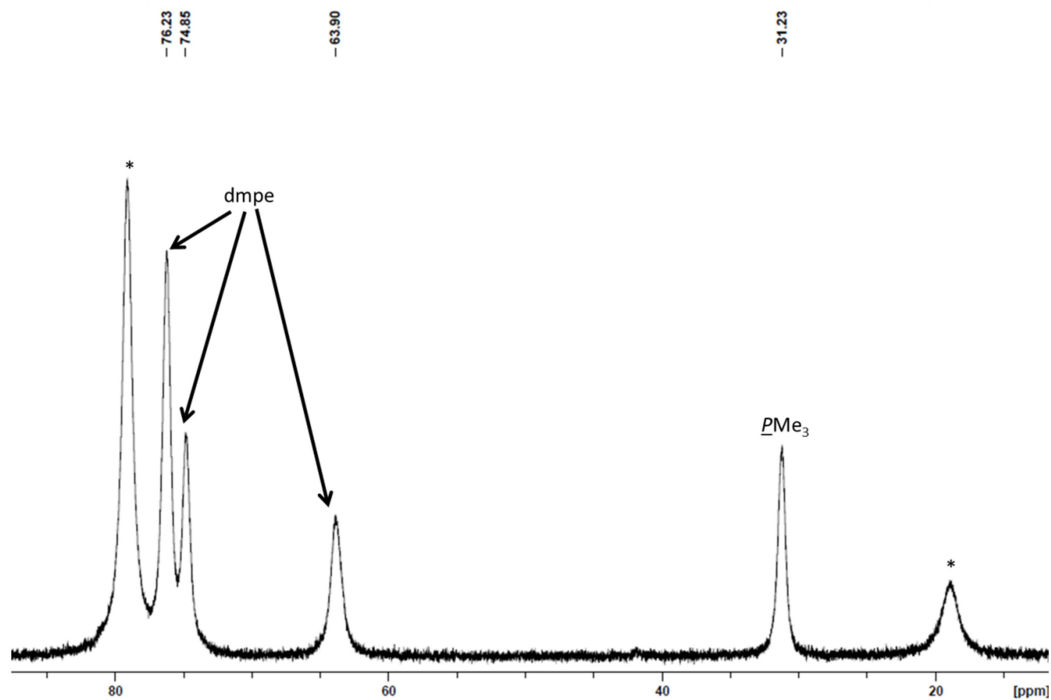

**Figure S74.** Expanded  $\text{MnP}$  region of the  $^{31}\text{P}\{^1\text{H}\}$  NMR spectrum of a solution containing *cis*- $[(\text{dmpe})_2\text{MnH}(\text{PMe}_3)]$  (***cis*-8**) generated from leaving a solution of *trans*- $[(\text{dmpe})_2\text{MnH}(\text{PMe}_3)]$  (***trans*-8**) in  $\text{C}_6\text{D}_6$  at room temperature (mix of light and dark) for 11 days (243 MHz, 298 K). \* indicates peaks from ***trans*-8**.

**Selected NMR Spectra for Deuteration of  $[(dmpe)_2Mn(\mu-H)_2BH_2]$  (**3**)**

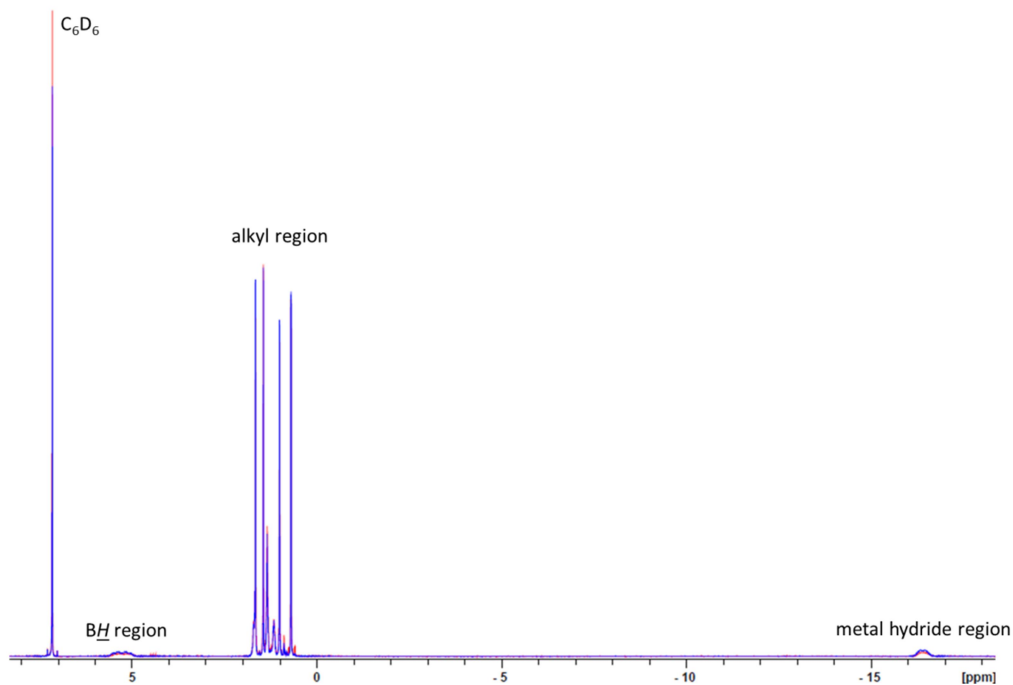

**Figure S75.**  $^1H$  NMR spectrum of a solution containing  $[(dmpe)_2Mn(\mu-H)_2BH_2]$  (**3**) and  $D_2$  immediately (blue) and after 12 h at  $90\text{ }^\circ C$  (red) in  $C_6D_6$  (600 MHz, 298 K).

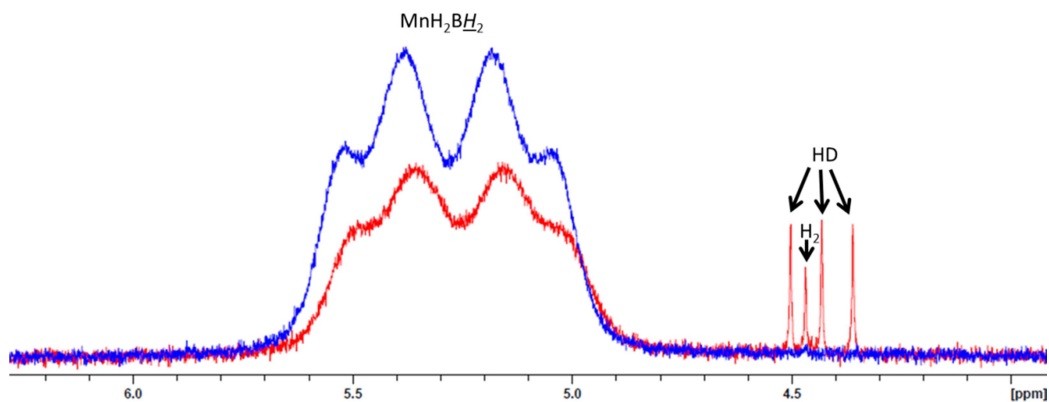

**Figure S76.** Expanded  $BH$  region of the  $^1H$  NMR spectrum of a solution containing  $[(dmpe)_2Mn(\mu-H)_2BH_2]$  (**3**) and  $D_2$  immediately (blue) and after 12 h at  $90\text{ }^\circ C$  (red) in  $C_6D_6$  (600 MHz, 298 K).

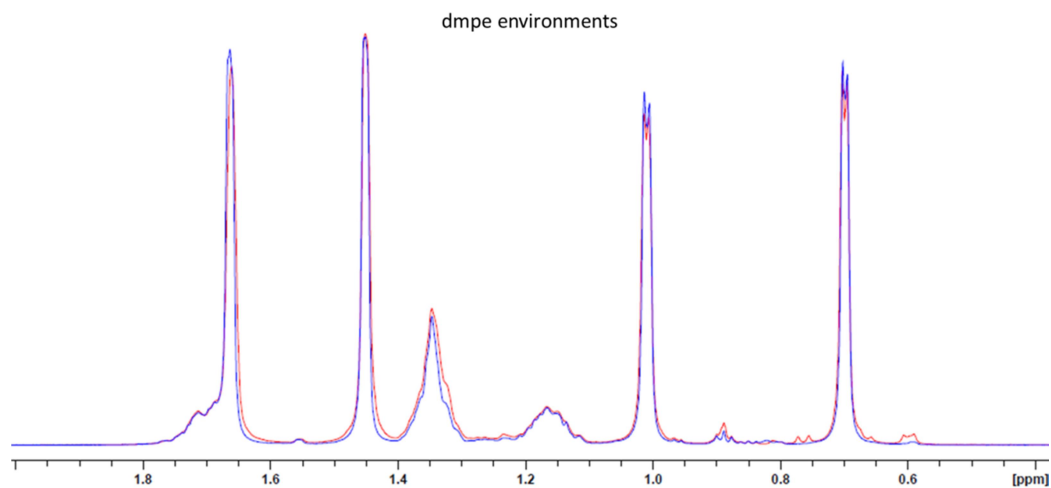

**Figure S77.** Expanded alkyl region of the  $^1\text{H}$  NMR spectrum of a solution containing  $[(\text{dmpe})_2\text{Mn}(\mu\text{-H})_2\text{BH}_2]$  (**3**) and  $\text{D}_2$  immediately (blue) and after 12 h at  $90\text{ }^\circ\text{C}$  (red) in  $\text{C}_6\text{D}_6$  (600 MHz, 298 K).

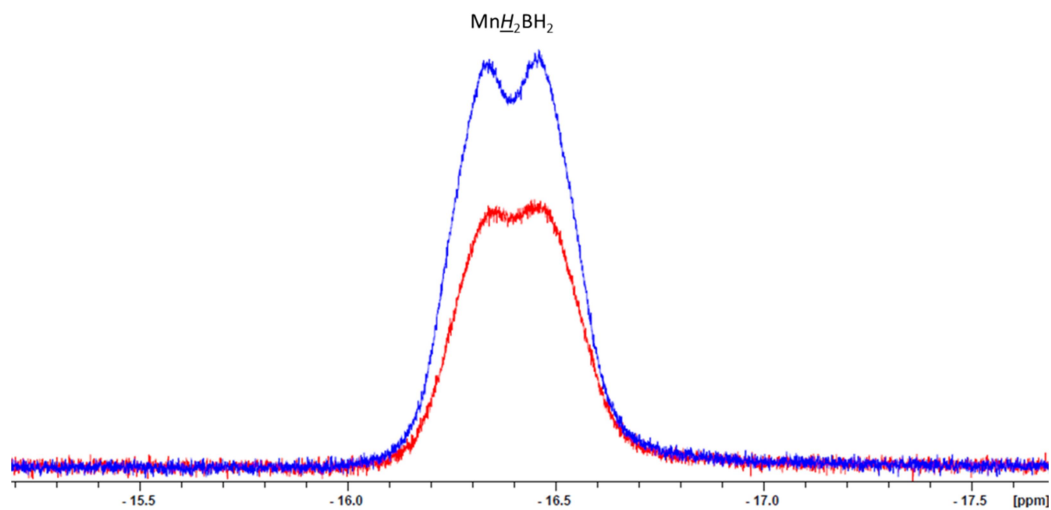

**Figure S78.** Expanded  $\text{MnH}$  region of the  $^1\text{H}$  NMR spectrum of a solution containing  $[(\text{dmpe})_2\text{Mn}(\mu\text{-H})_2\text{BH}_2]$  (**3**) and  $\text{D}_2$  immediately (blue) and after 12 h at  $90\text{ }^\circ\text{C}$  (red) in  $\text{C}_6\text{D}_6$  (600 MHz, 298 K).

**Experimental Details and Selected NMR Spectra of Intermediates in the Reactions of  $[(dmpe)_2MnH(C_2H_4)]$  (**1**) with 9-BBN or HBMe<sub>2</sub>**

**Reactions to generate the intermediates in the synthesis of 4.** a) 3.6 mg (0.030 mmol) of 9-BBN and 11.3 mg (0.029 mmol) of  $[(dmpe)_2MnH(C_2H_4)]$  (**1**) were dissolved in approx. 0.6 mL of C<sub>6</sub>D<sub>6</sub> and the resulting mixture was left for 7 days at room temperature and analyzed *in situ* by NMR spectroscopy indicating a 1.3 : 1.0 : 2.1 ratio of **1** : **4** : intermediates. b) 6.5 mg (0.05 mmol) of 9-BBN and 10.3 mg (0.27 mmol) of  $[(dmpe)_2MnH(C_2H_4)]$  (**1**) were dissolved in approx. 0.6 mL of C<sub>6</sub>D<sub>6</sub> and the resulting mixture was left for 3 days at room temperature and analyzed *in situ* by <sup>1</sup>H NMR spectroscopy indicating a 1.0 : 2.5 : 1.5 ratio of **1** : **4** : intermediates. A major (>95 %) and minor (<5 %) intermediate were both observed in solution. Selected NMR data for the major species: <sup>1</sup>H NMR (C<sub>6</sub>D<sub>6</sub>, 600 MHz, 298 K): δ 2.68, 2.60, 2.05, 0.53, 0.31 (5 × m, 1H), 2.46 (m, 4H), -1.44 (br. s, 1H), -13.14 (br. s, 1H, MnH). <sup>11</sup>B{<sup>1</sup>H} NMR (C<sub>6</sub>D<sub>6</sub>, 192 MHz, 298 K): δ -15.49 (s). <sup>31</sup>P{<sup>1</sup>H} NMR (C<sub>6</sub>D<sub>6</sub>, 243 MHz, 298 K): δ 85.83, 76.47, 64.94, 57.83 (4 × s, 1P). Selected NMR data for the minor species: <sup>31</sup>P{<sup>1</sup>H} NMR (C<sub>6</sub>D<sub>6</sub>, 243 MHz, 298 K): δ -5.64 (s).

**Reactions to generate the intermediates in the synthesis of 5.** 13.0 mg (0.052 mmol) of HBMe<sub>2</sub> and 10.0 mg (0.026 mmol) of  $[(dmpe)_2MnH(C_2H_4)]$  (**1**) were dissolved in approx. 0.6 mL of C<sub>6</sub>D<sub>6</sub>, and the resulting mixture was heated for 1.5 h at 60 °C. The resulting solution was analyzed *in situ* by NMR spectroscopy, indicating a 2.3 : 1.7 : 1.0 ratio of **1** : **5** : intermediates. A major (>95 %) and minor (<5 %) intermediate were both observed in solution. Selected NMR data for the major species: <sup>1</sup>H NMR (C<sub>6</sub>D<sub>6</sub>, 600 MHz, 298 K): 4.12 (app. t, 2H, *J* 2.2 Hz), 1.96 (q, 2H, <sup>3</sup>*J*<sub>H,H</sub> 7.1 Hz), -13.03 (t, 1H, *J*<sub>H,P</sub> 73.7 Hz, MnH). <sup>31</sup>P{<sup>1</sup>H} NMR (C<sub>6</sub>D<sub>6</sub>, 243 MHz, 298 K): δ -4.01 (s). Selected NMR data for the minor species: <sup>31</sup>P{<sup>1</sup>H} NMR (C<sub>6</sub>D<sub>6</sub>, 243 MHz, 298 K): δ 73.27 (br. s).

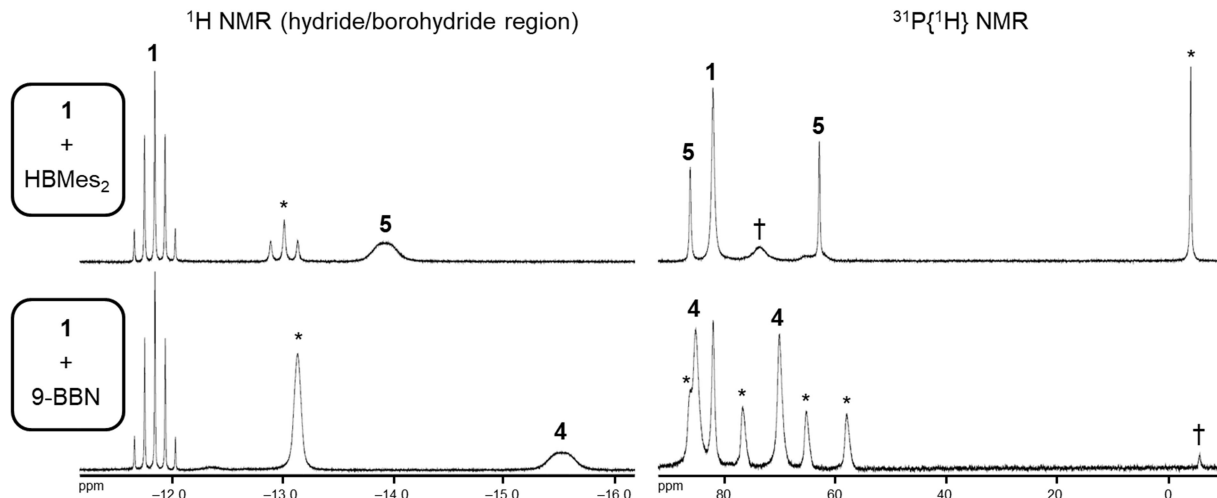

**Figure S79.** Left: (boro)hydride region of the <sup>1</sup>H NMR spectra, and right: <sup>31</sup>P{<sup>1</sup>H} NMR spectra, for reactions of *trans*- $[(dmpe)_2MnH(C_2H_4)]$  (**1**) with (bottom) 9-BBN or (top) HBMe<sub>2</sub> before completion. \* = peaks attributed to the dominant intermediate isomer, and † = peaks attributed to the minor intermediate isomer. C<sub>6</sub>D<sub>6</sub>, 600 MHz, 298 K.

## Experimental Details and Selected NMR Spectra of Solutions Generated by Hydroboration of Ethylene by HBR<sub>2</sub>

**Hydroboration of ethylene by 9-BBN and HBMe<sub>2</sub>** (in order to determine whether this reaction will take place under the conditions used to synthesize **3** and **4**, and to allow conclusive identification of the reaction byproducts EtBC<sub>8</sub>H<sub>14</sub> and EtBMe<sub>2</sub>). (a) Approximately 10 mg of 9-BBN was dissolved in roughly 0.6 mL of C<sub>6</sub>D<sub>6</sub>. The reaction mixture was freeze/pump/thaw cycled in a J. Young NMR tube three times and then was placed under 1 atm of ethylene at -95 °C, sealed, and warmed to room temperature. 90 % conversion of HBC<sub>8</sub>H<sub>14</sub> to EtBC<sub>8</sub>H<sub>14</sub> was observed by NMR spectroscopy after heating at 60 °C for 1 h, and the resulting solution of EtBC<sub>8</sub>H<sub>14</sub> was analyzed by NMR spectroscopy *in situ*. **<sup>1</sup>H NMR (C<sub>6</sub>D<sub>6</sub>, 600 MHz, 298 K):** δ 1.84 (m, 6H, C<sub>8</sub>H<sub>14</sub>), 1.76 (br. s, 2H, C<sub>8</sub>H<sub>14</sub>), 1.65 (m, 4H, C<sub>8</sub>H<sub>14</sub>), 1.35 (q, 2H, <sup>3</sup>J<sub>H,H</sub> 7.6 Hz, CH<sub>2</sub>CH<sub>3</sub>), 1.17 (m, 2H, C<sub>8</sub>H<sub>14</sub>) 1.08 (t, 3H, <sup>3</sup>J<sub>H,H</sub> 7.6 Hz, CH<sub>2</sub>CH<sub>3</sub>). **<sup>11</sup>B{<sup>1</sup>H} NMR (C<sub>6</sub>D<sub>6</sub>, 192 MHz, 298 K):** δ 87.41 (s). **<sup>13</sup>C{<sup>1</sup>H} NMR (C<sub>6</sub>D<sub>6</sub>, 151 MHz, 298 K):** δ 33.39, 23.63, 8.41 (3 × s), 31.13, 20.23 (2 × br. s). (b) Approximately 10 mg of BHMe<sub>2</sub> was dissolved in roughly 0.6 mL of C<sub>6</sub>D<sub>6</sub>. The reaction mixture was freeze/pump/thaw cycled in a J. Young NMR tube three times and then was placed under 1 atm of ethylene at -95 °C, sealed, and warmed to room temperature. 99 % conversion of HBMe<sub>2</sub> to EtBMe<sub>2</sub> was observed by NMR spectroscopy after heating at 60 °C for 1 h, and the resulting solution of EtBMe<sub>2</sub> was analyzed by NMR spectroscopy *in situ*. **<sup>1</sup>H NMR (C<sub>6</sub>D<sub>6</sub>, 600 MHz, 298 K):** δ 6.74 (s, 4H, m), 2.23 (s, 12H, o-CH<sub>3</sub>), 2.15 (s, 6H, p-CH<sub>3</sub>), 1.93 (q, 2H, <sup>3</sup>J<sub>H,H</sub> 7.5 Hz, CH<sub>2</sub>CH<sub>3</sub>), 1.15 (t, 3H, <sup>3</sup>J<sub>H,H</sub> 7.5 Hz, CH<sub>2</sub>CH<sub>3</sub>). **<sup>11</sup>B{<sup>1</sup>H} NMR (C<sub>6</sub>D<sub>6</sub>, 192 MHz, 298 K):** δ 84.02 (br. s). **<sup>13</sup>C{<sup>1</sup>H} NMR (C<sub>6</sub>D<sub>6</sub>, 151 MHz, 298 K):** δ 139.13, 138.34, 128.98, 22.91, 21.18, 9.38 (6 × s), 26.55 (br. s).

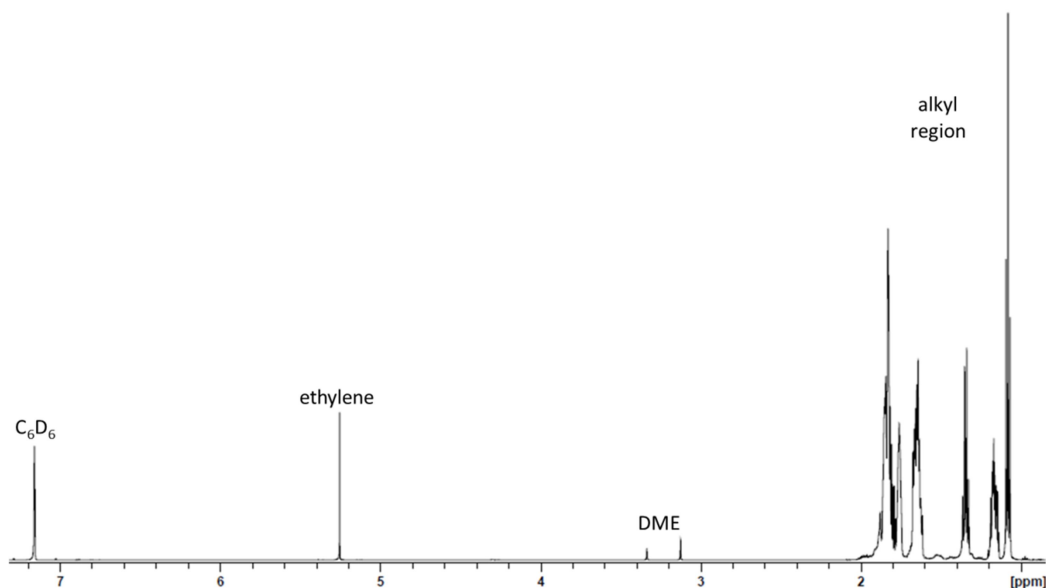

**Figure S80.** <sup>1</sup>H NMR spectrum of a solution containing EtBC<sub>8</sub>H<sub>14</sub>, observed *in situ* from the reaction of 9-BBN with ethylene for 1 h in C<sub>6</sub>D<sub>6</sub> at 60 °C (600 MHz, 298 K).



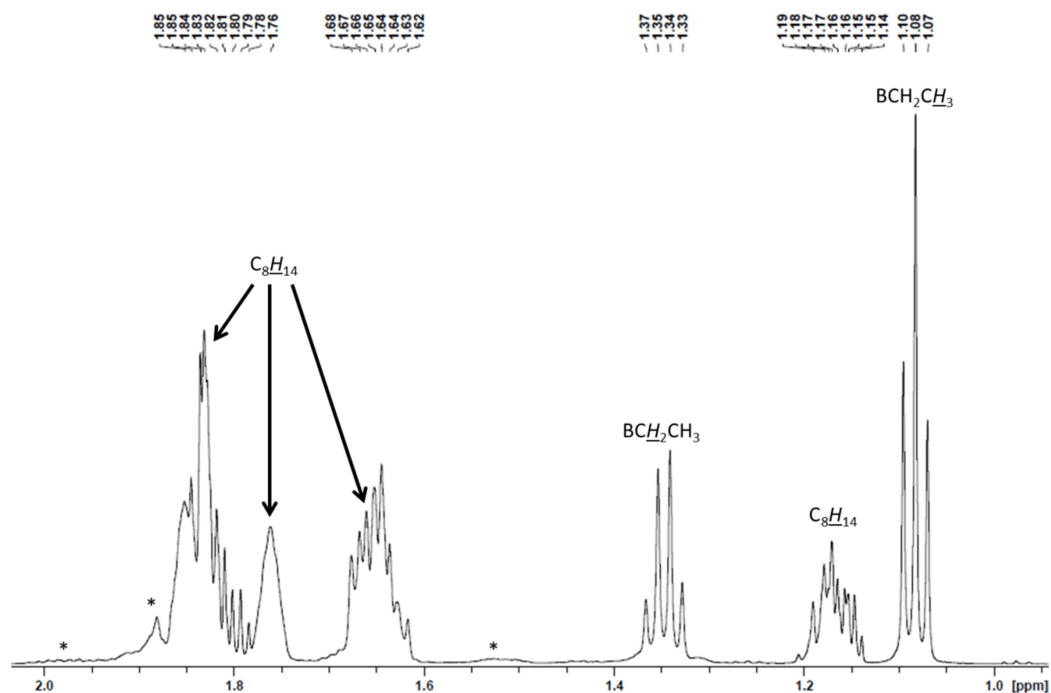

**Figure S81.** Expanded alkyl region of the  $^1\text{H}$  NMR spectrum of a solution containing  $\text{EtBC}_8\text{H}_{14}$ , observed *in situ* from the reaction of 9-BBN ethylene for 1 h in  $\text{C}_6\text{D}_6$  at 60 °C (600 MHz, 298 K). \* indicates peaks from residual 9-BBN.

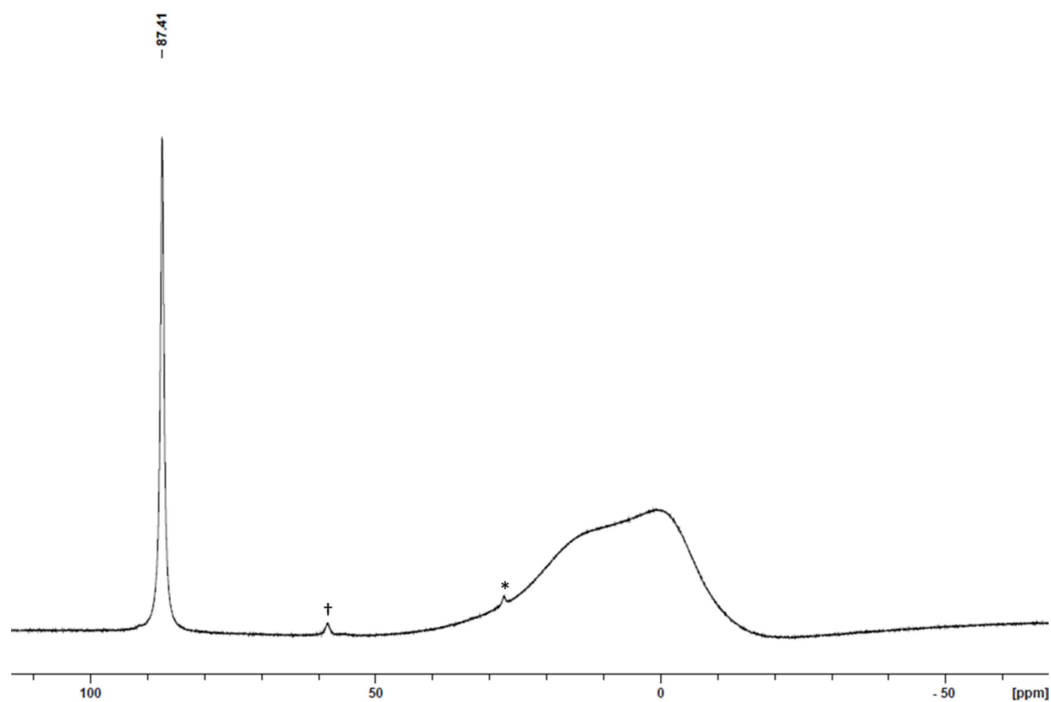

**Figure S82.**  $^{11}\text{B}\{^1\text{H}\}$  NMR spectrum of a solution containing  $\text{EtBC}_8\text{H}_{14}$ , observed *in situ* from the reaction of 9-BBN with ethylene for 1 h in  $\text{C}_6\text{D}_6$  at 60 °C (192 MHz, 298 K). \* indicates a peak from residual 9-BBN, and † indicates a peak from an impurity present in the 9-BBN starting material.

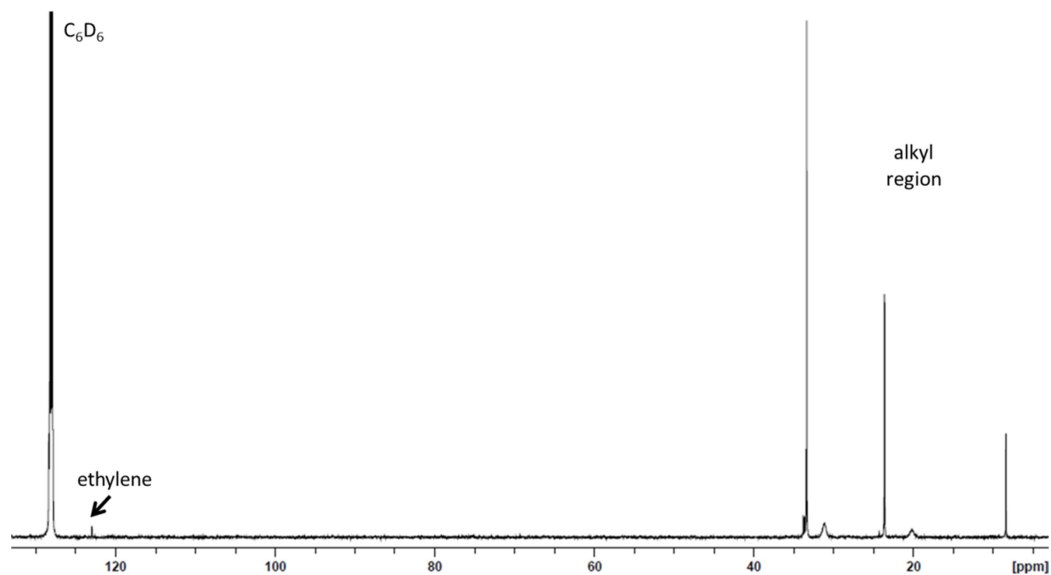

**Figure S83.**  $^{13}\text{C}\{^1\text{H}\}$  NMR spectrum of a solution containing  $\text{EtBC}_8\text{H}_{14}$ , observed *in situ* from the reaction of 9-BBN with ethylene for 1 h in  $\text{C}_6\text{D}_6$  at 60 °C (151 MHz, 298 K).

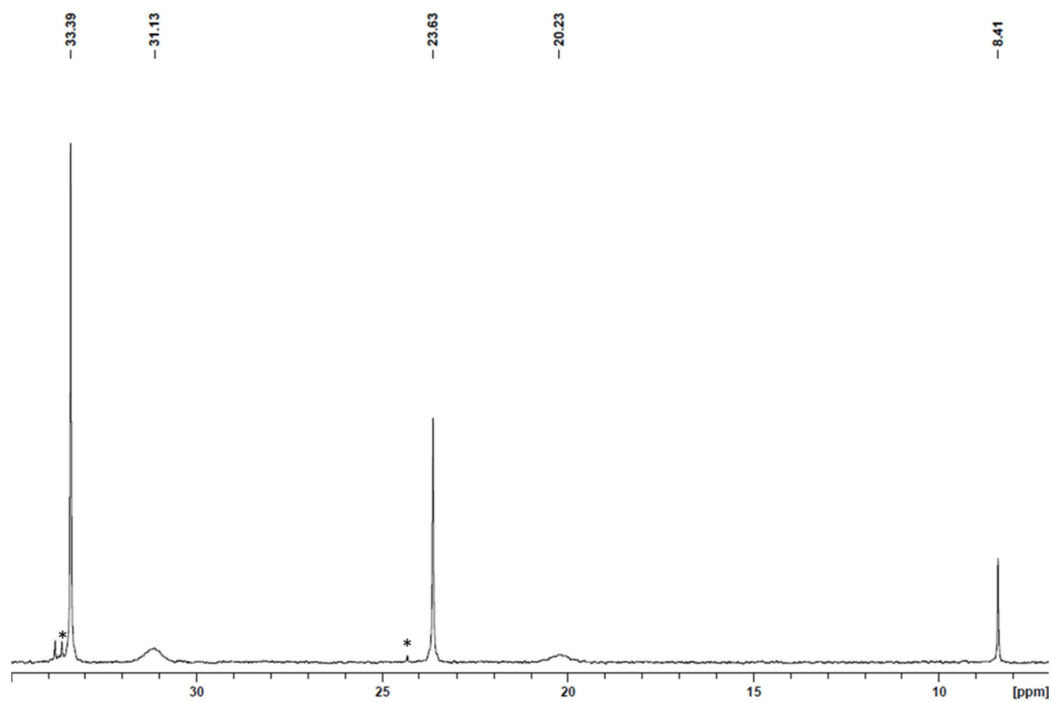

**Figure S84.** Expanded alkyl region of the  $^{13}\text{C}\{^1\text{H}\}$  NMR spectrum of a solution containing  $\text{EtBC}_8\text{H}_{14}$ , observed *in situ* from the reaction of 9-BBN with ethylene for 1 h in  $\text{C}_6\text{D}_6$  at 60 °C (151 MHz, 298 K). \* indicates peaks from residual 9-BBN.

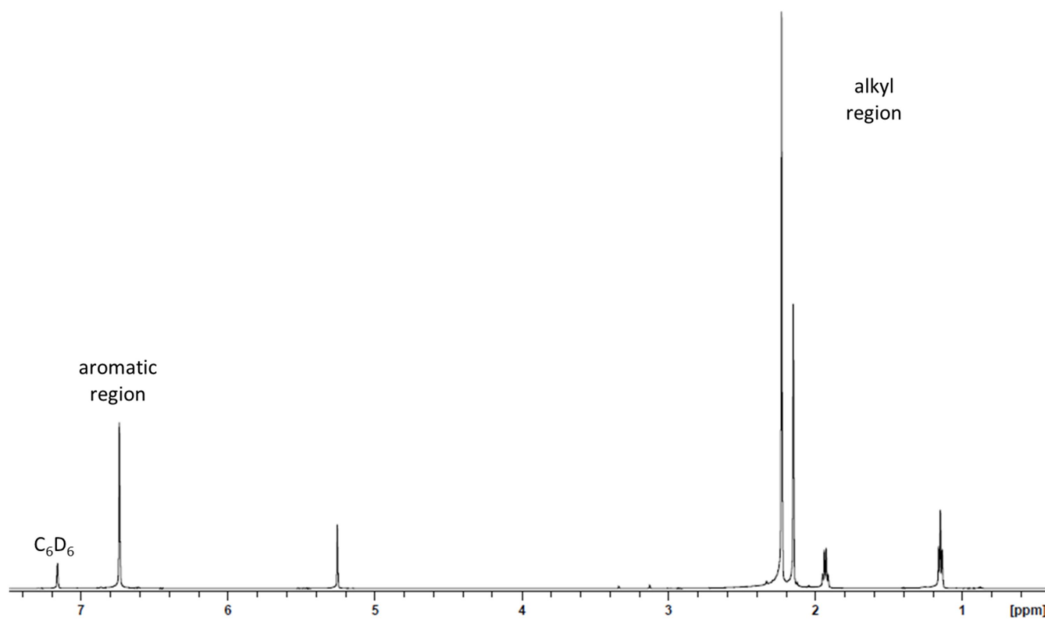

**Figure S85.**  $^1\text{H}$  NMR spectrum of a solution containing  $\text{EtBMes}_2$ , observed *in situ* from the reaction of  $\text{HBMes}_2$  with ethylene for 1 h in  $\text{C}_6\text{D}_6$  at  $60^\circ\text{C}$  (600 MHz, 298 K).

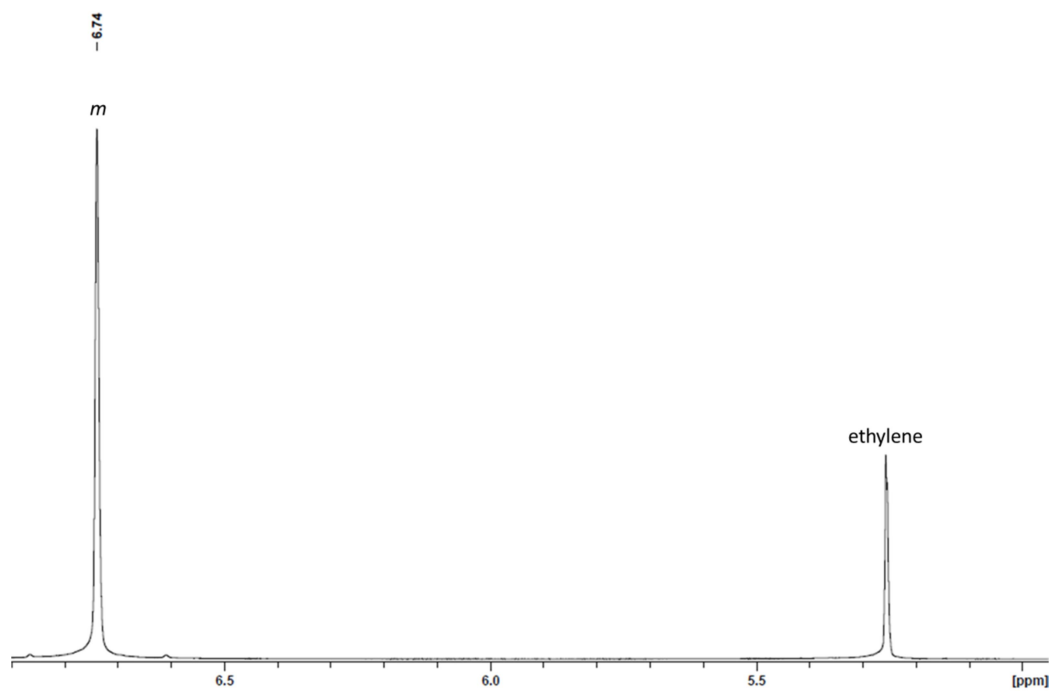

**Figure S86.** Expanded aromatic region of the  $^1\text{H}$  NMR spectrum of a solution containing  $\text{EtBMes}_2$ , observed *in situ* from the reaction of  $\text{HBMes}_2$  with ethylene for 1 h in  $\text{C}_6\text{D}_6$  at  $60^\circ\text{C}$  (600 MHz, 298 K).

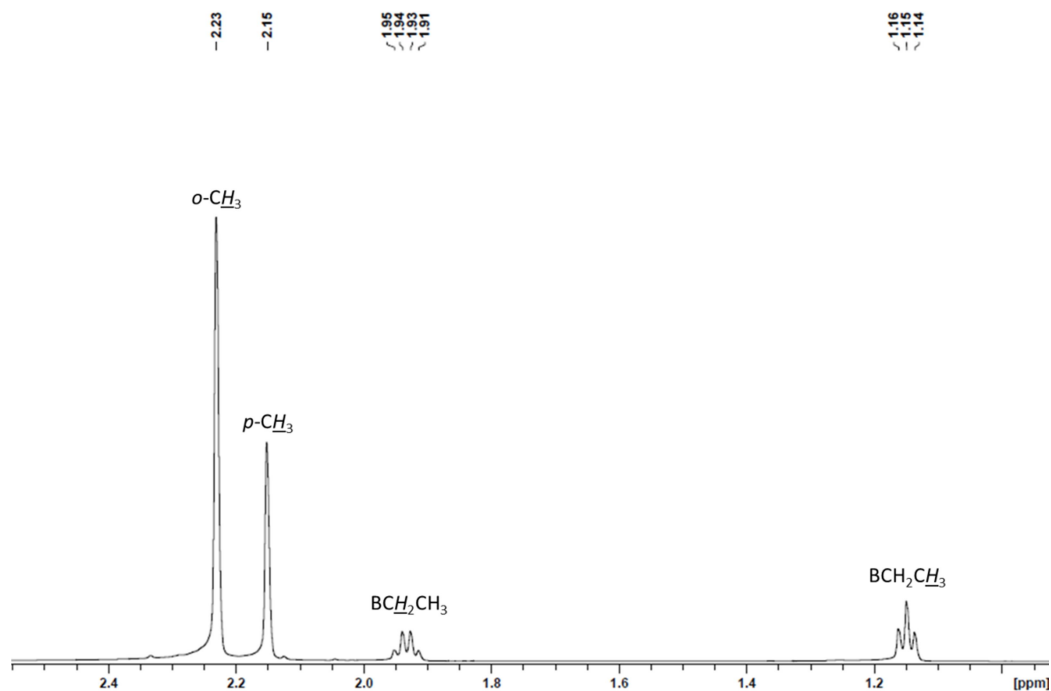

**Figure S87.** Expanded alkyl region of the  $^1\text{H}$  NMR spectrum of a solution containing EtBMes<sub>2</sub>, observed *in situ* from the reaction of HBMes<sub>2</sub> with ethylene for 1 h in C<sub>6</sub>D<sub>6</sub> at 60 °C (600 MHz, 298 K).

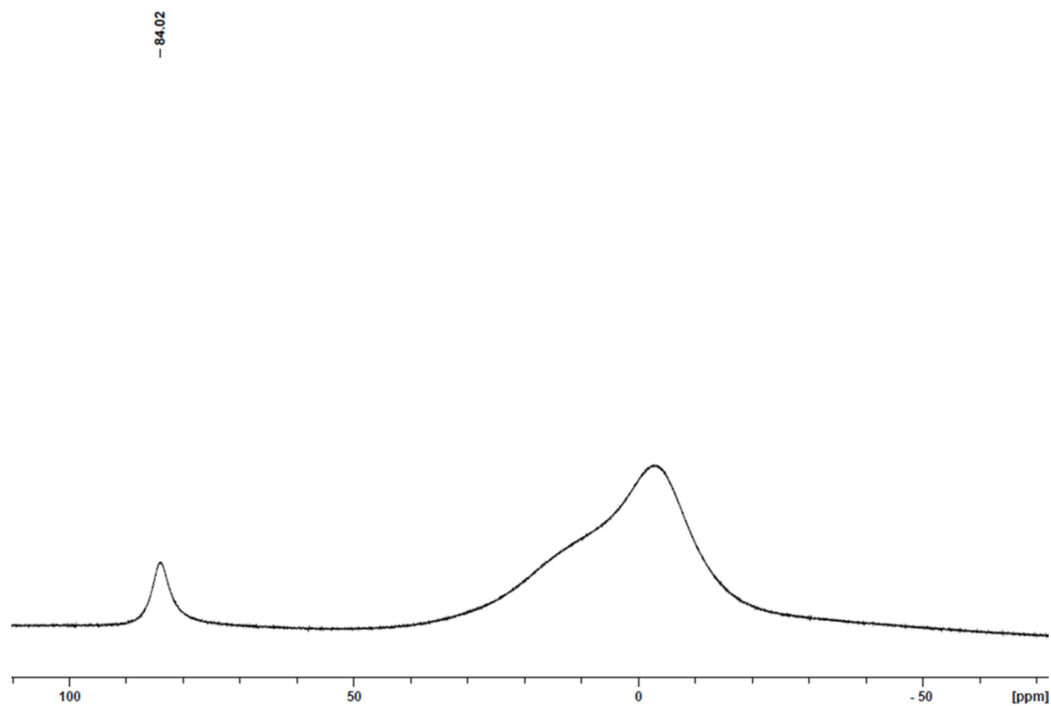

**Figure S88.**  $^{11}\text{B}\{^1\text{H}\}$  NMR spectrum of a solution containing EtBMes<sub>2</sub>, observed *in situ* from the reaction of HBMes<sub>2</sub> with ethylene for 1 h in C<sub>6</sub>D<sub>6</sub> at 60 °C (192 MHz, 298 K).

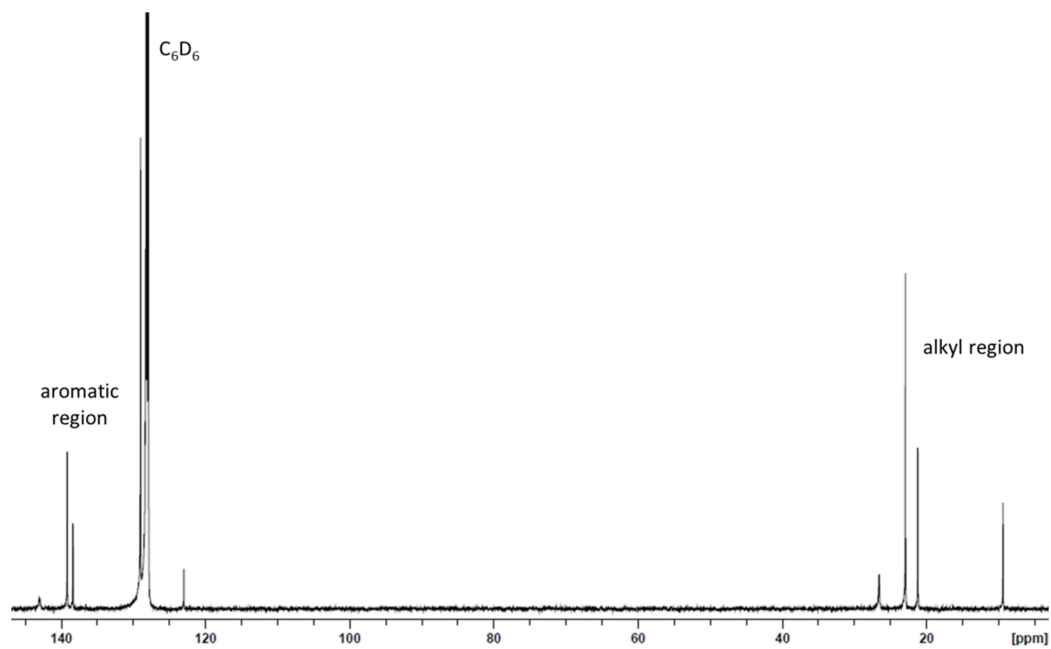

**Figure S89.**  $^{13}\text{C}\{^1\text{H}\}$  NMR spectrum of a solution containing  $\text{EtBMes}_2$ , observed *in situ* from the reaction of  $\text{HBMes}_2$  with ethylene for 1 h in  $\text{C}_6\text{D}_6$  at  $60^\circ\text{C}$  (151 MHz, 298 K).

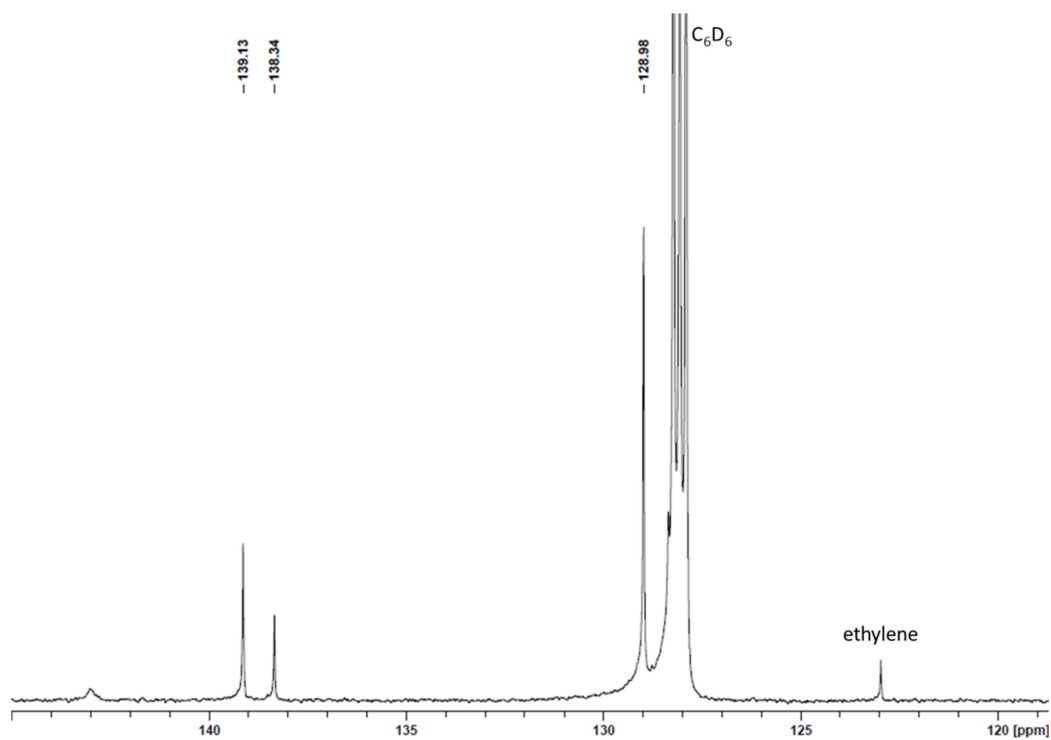

**Figure S90.** Expanded aromatic region of the  $^{13}\text{C}\{^1\text{H}\}$  NMR spectrum of a solution containing  $\text{EtBMes}_2$ , observed *in situ* from the reaction of  $\text{HBMes}_2$  with ethylene for 1 h in  $\text{C}_6\text{D}_6$  at  $60^\circ\text{C}$  (151 MHz, 298 K).

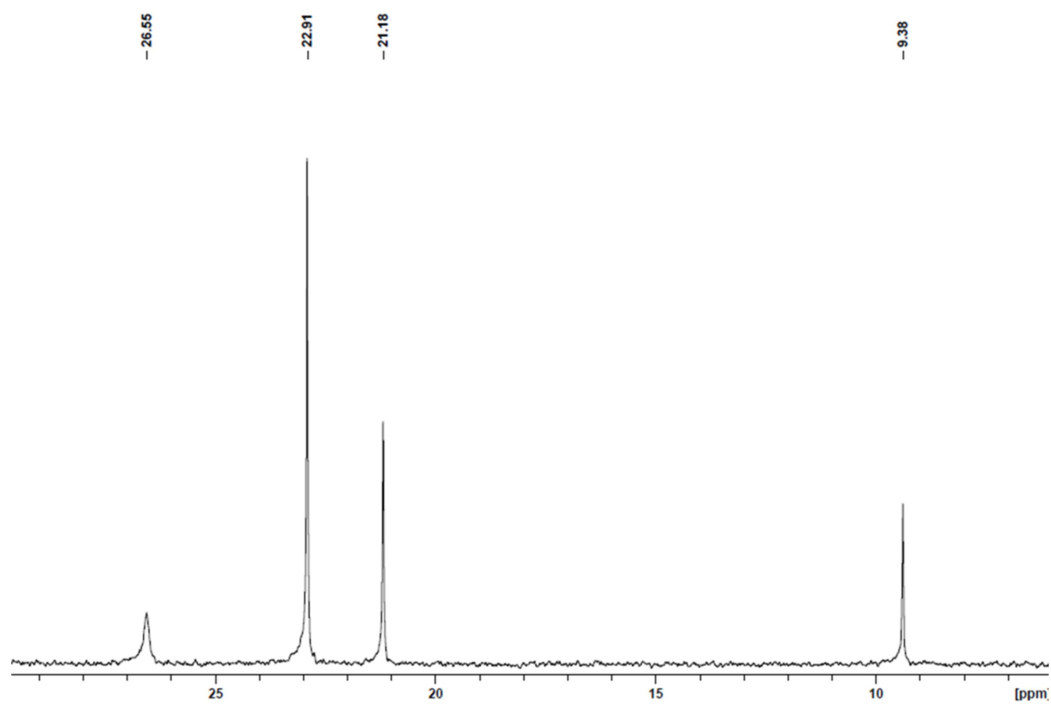

**Figure S91.** Expanded alkyl region of the  $^{13}\text{C}\{^1\text{H}\}$  NMR spectrum of a solution containing EtBMes<sub>2</sub>, observed *in situ* from the reaction of HBMe<sub>2</sub> with ethylene for 1 h in C<sub>6</sub>D<sub>6</sub> at 60 °C (151 MHz, 298 K).

**Selected NMR Spectra for Determining the Mechanism of the Reaction of  $[(dmpe)_2MnH(C_2H_4)]$  (**1**) with  $HBMes_2$**

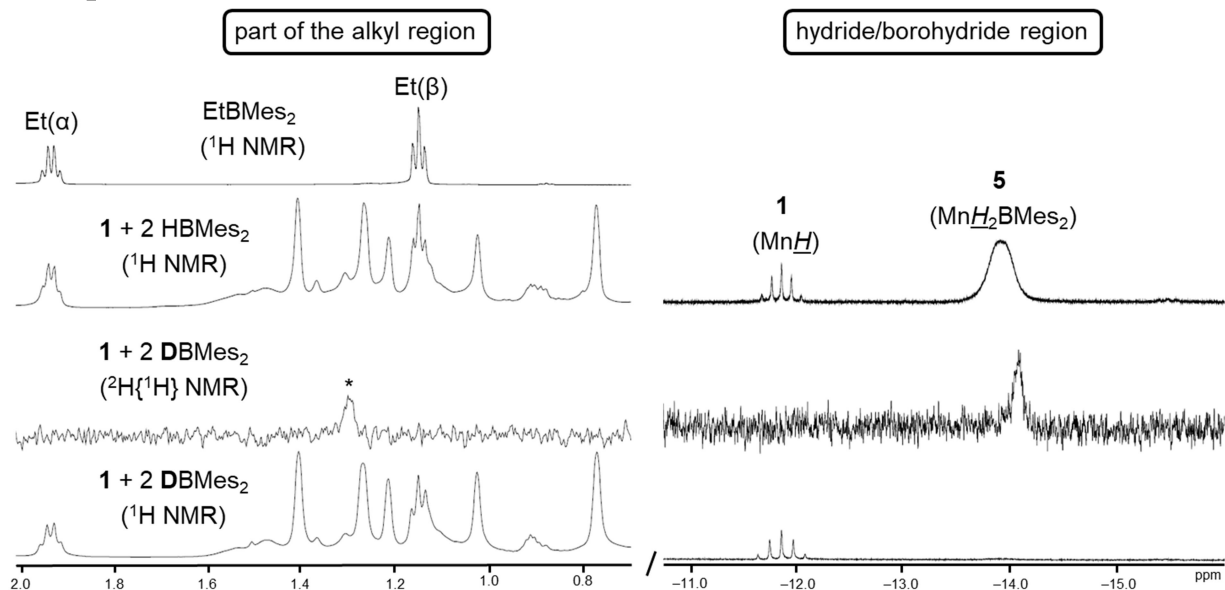

**Figure S92.** Regions of the <sup>1</sup>H NMR spectra ( $n = 1$ ; 500 or 600 MHz,  $n = 2$ ; 77 MHz) in  $C_6D_6$  at 298 K containing the  $EtBMes_2$  (left) and metal hydride/borohydride (right) environments for, from bottom to top, <sup>1</sup>H NMR for the reaction of 2 DBMes<sub>2</sub> with  $[(dmpe)_2MnH(C_2H_4)]$  (**1**) after heating overnight at 60 °C, <sup>2</sup>H NMR for the reaction of 2 DBMes<sub>2</sub> with **1** after heating overnight at 60 °C, <sup>1</sup>H NMR for the reaction of 2 HBMes<sub>2</sub> with **1** after heating overnight at 60 °C, and <sup>1</sup>H NMR for EtBMes<sub>2</sub>. \* is from an impurity in the  $C_6D_6$  used. Spectra indicate that the products of the reaction of **1** with two equivalents of DBMes<sub>2</sub> are fully protonated EtBMes<sub>2</sub> and  $[(dmpe)_2Mn(\mu-D)_2BMes_2]$  (**d<sub>2</sub>-5**).

## References

1. (a) ADF2010, SCM, Theoretical Chemistry, Vrije Universiteit, Amsterdam, The Netherlands, <http://www.scm.com>; C. F. Guerra, J. G. Snijders, G. te Velde and E. J. Baerends, *Theor. Chem. Acc.*, 1998, **99**, 391-403; (b) G. te Velde, F. M. Bickelhaupt, E. J. Baerends, C. Fonseca Guerra, S. J. A. Van Gisbergen, J. G. Snijders and T. Ziegler, *J. Comput. Chem.*, 2001, **22**, 931-967.
2. J. P. Perdew, K. Burke and M. Ernzerhof, *Phys. Rev. Lett.*, 1996, **77**, 3865-3868.
3. (a) E. van Lenthe, E. J. Baerends and J. G. Snijders, *J. Chem. Phys.*, 1993, **99**, 4597-4610; (b) E. van Lenthe, E. J. Baerends and J. G. Snijders, *J. Chem. Phys.*, 1994, **101**, 9783-9792; (c) E. van Lenthe, J. G. Snijders and E. J. Baerends, *J. Chem. Phys.*, 1996, **105**, 6505-6516; (d) E. van Lenthe, R. van Leeuwen, E. J. Baerends and J. G. Snijders, *Int. J. Quantum Chem.*, 1996, **57**, 281-293; (e) E. van Lenthe, A. Ehlers and E. J. Baerends, *J. Chem. Phys.*, 1999, **110**, 8943-8953.
4. (a) S. Grimme, J. Antony, S. Ehrlich and H. Krieg, *J. Chem. Phys.*, 2010, **132**, 154104; (b) S. Grimme, S. Ehrlich and L. Goerigk, *J. Comput. Chem.*, 2011, **32**, 1456-1465.
5. (a) A. D. Becke, *J. Chem. Phys.*, 1988, **88**, 2547-2553; (b) M. Franchini, P. H. T. Philipsen and L. Visscher, *J. Comput. Chem.*, 2013, **34**, 1819-1827.
6. (a) A. Bérces, R. M. Dickson, L. Fan, H. Jacobsen, D. Swerhone and T. Ziegler, *Comput. Phys. Commun.*, 1997, **100**, 247-262; (b) H. Jacobsen, A. Bérces, D. P. Swerhone and T. Ziegler, *Comput. Phys. Commun.*, 1997, **100**, 263-276; (c) S. K. Wolff, *Int. J. Quantum Chem.*, 2005, **104**, 645-659.
7. The SCANFREQ command rescans a specific range of frequencies along a normal mode numerically as described in the ADF manual: <https://www.scm.com/doc/ADF/Input/Frequencies.html#scanning-a-range-of-frequencies>. Reference for numeric frequency calculations is as follows; L. Fan and T. Ziegler, *J. Chem. Phys.*, 1992, **96**, 9005-9012.
8. R. F. W. Bader, *Atoms in Molecules: A Quantum Theory*, Clarendon Press, Oxford, 1990.
9. (a) J. I. Rodríguez, R. F. W. Bader, P. W. Ayers, C. Michel, A. W. Götz and C. Bo, *Chem. Phys. Lett.*, 2009, **472**, 149-152; (b) J. I. Rodríguez, A. M. Köster, P. W. Ayers, A. Santos-Valle, A. Vela and G. Merino, *J. Comput. Chem.*, 2009, **30**, 1082-1092; (c) J. I. Rodríguez, *J. Comput. Chem.*, 2013, **34**, 681-686; (d) P. W. Ayers and S. Jenkins, *Computational and Theoretical Chemistry*, 2015, **1053**, 112-122; (e) V. Tognetti and L. Joubert, *Physical Chemistry Chemical Physics*, 2014, **16**, 14539-14550; (f) Y. A. Abramov, *Acta Crystallogr., Sect. A: Found. Crystallogr.*, 1997, **A53**, 264-272; (g) X. Fradera, M. A. Austen and R. F. W. Bader, *The Journal of Physical Chemistry A*, 1999, **103**, 304-314; (h) J. Poater, M. Solà, M. Duran and X. Fradera, *Theoretical Chemistry Accounts*, 2002, **107**, 362-371.
